# Supplementary material for: Smoking and Dental Implants: A Systematic Review and Meta-Analysis
Source: MDPI journal article supplement (doi:10.3390/medicina58010039), 2021-12-27
Supplement: s1 [file s1]

## SUPPLEMENTARY MATERIAL

- a. Dental implant-related journals included in the manual search;
- b. Reference list of the included studies;
- c. Figure S1. Forest plot for the event 'implant failure', global results;
- d. Table S1. Detailed data of the included studies;
- e. Table S2. Quality assessment of the included studies, according to the National Institutes of Health (NIH).

### **a. Dental implant-related journals included in the manual search**

Clinical Implant Dentistry and Related Research, Clinical Oral Implants Research, European Journal of Oral Implantology, Implant Dentistry, International Journal of Implant Dentistry, International Journal of Oral and Maxillofacial Implants, International Journal of Oral Implantology, International Journal of Prosthodontics, Journal of Clinical Periodontology, Journal of Oral Implantology, Journal of Periodontology, Journal of Prosthetic Dentistry, Journal of Prosthodontics, Journal of Prosthodontic Research.

### **b. Reference list of the included studies**

1. Abduljabbar T, Al-Hamoudi N, Al-Sowayh ZH, Alajmi M, Javed F, Vohra F. Comparison of peri-implant clinical and radiographic status around short (6 mm in length) dental implants placed in cigarette-smokers and never-smokers: Six-year follow-up results. *Clin Implant Dent Relat Res*. 2018 Feb;20(1):21-25.
2. Abi-Aad H, Daher F, Dimassi H, Cordioli G, Majzoub Z. Immediate vs conventional loading of variable-thread tapered implants supporting three- to four-unit fixed partial dentures in the posterior maxilla: 1-year interim results of a split-mouth randomised controlled trial. *Eur J Oral Implantol*. 2018;11(3):337-350.
3. Agliardi E, Clericò M, Ciano P, Massironi D. Immediate loading of full-arch fixed prostheses supported by axial and tilted implants for the treatment of edentulous atrophic mandibles. *Quintessence Int*. 2010 Apr;41(4):285-93.
4. Agliardi EL, Pozzi A, Stappert CF, Benzi R, Romeo D, Gherlone E. Immediate fixed rehabilitation of the edentulous maxilla: a prospective clinical and radiological study after 3 years of loading. *Clin Implant Dent Relat Res*. 2014 Apr;16(2):292-302.
5. Al Amri MD, Kellesarian SV, Abduljabbar TS, Al Rifaiy MQ, Al Baker AM, Al-Kheraif AA. Comparison of Peri-Implant Soft Tissue Parameters and Crestal Bone Loss Around Immediately Loaded and Delayed Loaded Implants in Smokers and Non-Smokers: 5-Year Follow-Up Results. *J Periodontol*. 2017 Jan;88(1):3-9.
6. Al Najam Y, Tahmaseb A, Wiryasaputra D, Wolvius E, Dharmo B. Outcomes of dental implants in young patients with congenital versus non-congenital missing teeth. *Int J Implant Dent*. 2021 Aug 23;7(1):92.
7. Al-Aali KA, Alrabiah M, Al-Hamdan RS, Al-Hamoudi N, Aldahian N, Abduljabbar T. Impact of jaw location on clinical and radiological status of dental implants placed in cigarette-smokers and never-smokers: 5-year follow-up results. *Clin Implant Dent Relat Res*. 2018 Dec;20(6):983-987.
8. Alahmari F, Javed F, Ahmed ZU, Romanos GE, Al-Kheraif AA. Soft tissue status and crestal bone loss around conventionally-loaded dental implants placed in cigarette- and waterpipe (narghile) smokers: 8-years' follow-up results. *Clin Implant Dent Relat Res*. 2019 Oct;21(5):873-878.
9. Alasqah MN, Alfawaz YF, Aldahyan N, Vohra F, Alotaibi BM, Abduljabbar T. Longitudinal assessment of clinical and radiographic periimplant status around narrow and regular diameter implants placed in cigarette-smokers and nonsmokers. *Clin Implant Dent Relat Res*. 2019 Oct;21(5):910-915.
10. Alghamdi O, Alrabiah M, Al-Hamoudi N, AlKindi M, Vohra F, Abduljabbar T. Peri-implant soft tissue status and crestal bone loss around immediately-loaded narrow-diameter implants placed

- in cigarette-smokers: 6-year follow-up results. *Clin Implant Dent Relat Res*. 2020 Apr;22(2):220-225.
11. Aloy-Prósper A, Peñarrocha-Oltra D, Peñarrocha-Diago M, Camacho-Alonso F, Peñarrocha-Diago M. Peri-implant Hard and Soft Tissue Stability in Implants Placed Simultaneously Versus Delayed with Intraoral Block Bone Grafts in Horizontal Defects: A Retrospective Case Series Study. *Int J Oral Maxillofac Implants*. 2016 Jan-Feb;31(1):133-41.
  12. Alqahtani F, Alqahtani N, Alkhtani F, Devang Divakar D, Al-Kheraif AA, Javed F. Clinicoradiographic markers of peri-implantitis in cigarette-smokers and never-smokers with type 2 diabetes mellitus at 7-years follow-up. *J Periodontol*. 2020 Sep;91(9):1132-1138.
  13. Alsaadi G, Quirynen M, Komárek A, van Steenberghe D. Impact of local and systemic factors on the incidence of oral implant failures, up to abutment connection. *J Clin Periodontol*. 2007 Jul;34(7):610-7.
  14. Alsaadi G, Quirynen M, Komárek A, van Steenberghe D. Impact of local and systemic factors on the incidence of late oral implant loss. *Clin Oral Implants Res*. 2008 Jul;19(7):670-6.
  15. Alsaadi G, Quirynen M, Michiles K, Teughels W, Komárek A, van Steenberghe D. Impact of local and systemic factors on the incidence of failures up to abutment connection with modified surface oral implants. *J Clin Periodontol*. 2008 Jan;35(1):51-7.
  16. Al-Sabbagh M, Thomas MV, Bhavsar I, De Leeuw R. Effect of Bisphosphonate and Age on Implant Failure as Determined by Patient-Reported Outcomes. *J Oral Implantol*. 2015 Dec;41(6):e287-91.
  17. Angelis P, Passarelli PC, Gasparini G, Boniello R, D'Amato G, De Angelis S. Monolithic CAD-CAM lithium disilicate versus monolithic CAD-CAM zirconia for single implant-supported posterior crowns using a digital workflow: A 3-year cross-sectional retrospective study. *J Prosthet Dent*. 2020 Feb;123(2):252-256.
  18. Anitua E, Alkhraisat MH. Clinical Performance of Short Dental Implants Supporting Single Crown Restoration in the Molar-Premolar Region: Cement Versus Screw Retention. *Int J Oral Maxillofac Implants*. 2019 July/August;34(4):969–976.
  19. Anitua E, Orive G, Aguirre JJ, Ardanza B, Andía I. 5-year clinical experience with BTI dental implants: risk factors for implant failure. *J Clin Periodontol*. 2008 Aug;35(8):724-32.
  20. Anner R, Grossmann Y, Anner Y, Levin L. Smoking, diabetes mellitus, periodontitis, and supportive periodontal treatment as factors associated with dental implant survival: a long-term retrospective evaluation of patients followed for up to 10 years. *Implant Dent*. 2010 Feb;19(1):57-64.
  21. Arora H, Ivanovski S. Clinical and aesthetic outcomes of immediately placed single-tooth implants with immediate vs. delayed restoration in the anterior maxilla: A retrospective cohort study. *Clin Oral Implants Res*. 2018 Mar;29(3):346-352.
  22. Arora H, Ivanovski S. Immediate and early implant placement in single-tooth gaps in the anterior maxilla: A prospective study on ridge dimensional, clinical, and aesthetic changes. *Clin Oral Implants Res*. 2018 Nov;29(11):1143-1154.
  23. Atarchi AR, Miley DD, Omran MT, Abdulkareem AA. Early Failure Rate and Associated Risk Factors for Dental Implants Placed With and Without Maxillary Sinus Augmentation: A Retrospective Study. *Int J Oral Maxillofac Implants*. 2020 Nov/Dec;35(6):1187-1194.
  24. Aykent F, Inan O, Ozyesil AG, Alptekin NO. A 1- to 12-year clinical evaluation of 106 endosseous implants supporting fixed and removable prostheses. *Int J Periodontics Restorative Dent*. 2007 Aug;27(4):358-67.
  25. Bain CA, Moy PK. The association between the failure of dental implants and cigarette smoking. *Int J Oral Maxillofac Implants*. 1993;8(6):609-15.
  26. Bain CA. Smoking and implant failure--benefits of a smoking cessation protocol. *Int J Oral Maxillofac Implants*. 1996 Nov-Dec;11(6):756-9.
  27. Balaguer J, Ata-Ali J, Peñarrocha-Oltra D, García B, Peñarrocha-Diago M. Long-term survival rates of implants supporting overdentures. *J Oral Implantol*. 2015 Apr;41(2):173-7.

28. Balshi TJ, Wolfinger GJ, Slauch RW, Balshi SF. A retrospective analysis of 800 Brånemark System implants following the All-on-Four™ protocol. *J Prosthodont*. 2014 Feb;23(2):83-8.
29. Barbato L, Baldi N, Gonnelli A, Duvina M, Nieri M, Tonelli P. Association of Smoking Habits and Height of Residual Bone on Implant Survival and Success Rate in Lateral Sinus Lift: A Retrospective Study. *J Oral Implantol*. 2018 Dec;44(6):432-438.
30. Barnea E, Tal H, Nissan J, Tarrasch R, Peleg M, Kolerman R. The Use of Tilted Implant for Posterior Atrophic Maxilla. *Clin Implant Dent Relat Res*. 2016 Aug;18(4):788-800.
31. Barone A, Alfonsi F, Derchi G, Tonelli P, Toti P, Marchionni S, Covani U. The Effect of Insertion Torque on the Clinical Outcome of Single Implants: A Randomized Clinical Trial. *Clin Implant Dent Relat Res*. 2016 Jun;18(3):588-600.
32. Barone A, Toti P, Quaranta A, Derchi G, Covani U. The Clinical Outcomes of Immediate Versus Delayed Restoration Procedures on Immediate Implants: A Comparative Cohort Study for Single-Tooth Replacement. *Clin Implant Dent Relat Res*. 2015 Dec;17(6):1114-26.
33. Bell C, Bell RE. Immediate restoration of NobelActive implants placed into fresh extraction sites in the anterior maxilla. *J Oral Implantol*. 2014 Aug;40(4):455-8.
34. Bell CL, Diehl D, Bell BM, Bell RE. The immediate placement of dental implants into extraction sites with periapical lesions: a retrospective chart review. *J Oral Maxillofac Surg*. 2011 Jun;69(6):1623-7.
35. Bischof M, Nedir R, Abi Najm S, Szmukler-Moncler S, Samson J. A five-year life-table analysis on wide neck ITI implants with prosthetic evaluation and radiographic analysis: results from a private practice. *Clin Oral Implants Res*. 2006 Oct;17(5):512-20.
36. Boardman N, Darby I, Chen S. A retrospective evaluation of aesthetic outcomes for single-tooth implants in the anterior maxilla. *Clin Oral Implants Res*. 2016 Apr;27(4):443-51.
37. Boboeva O, Kwon TG, Kim JW, Lee ST, Choi SY. Comparing factors affecting dental-implant loss between age groups: A retrospective cohort study. *Clin Implant Dent Relat Res*. 2021 Apr;23(2):208-215.
38. Bouhy A, Rompen E, Lamy M, Legros C, Lecloux G, Lambert F. Maxillary implant overdenture retained by four unsplinted attachments and opposed by a natural or fixed dentition: One-year clinical outcomes. *Clin Oral Implants Res*. 2020 Aug;31(8):747-767.
39. Brandt R, Hollis S, Ahuja S, Adatrow P, Balanoff W. Short-term objective and subjective evaluation of small-diameter implants used to support and retain mandibular prosthesis. *J Tenn Dent Assoc*. 2012 Spring;92(1):34-8; quiz 38-9.
40. Cakar S, Selvi F, Can T, Kirli I, Palancioglu A, Keskin B, Yaltirik M, Keskin C. Investigation of the risk factors associated with the survival rate of dental implants. *Implant Dent*. 2014 Jun;23(3):328-33.
41. Cannizzaro G, Cavallari M, Lazzarini M, Purello D'ambrosio G, Scialpi G, Audino S, Velasco-Ortega E, Ippolito DR, Esposito M. Immediate loading of three (fixed-on-3) vs four (fixed-on-4) implants supporting cross-arch fixed prostheses: 1-year results from a multicentre randomised controlled trial. *Eur J Oral Implantol*. 2018;11(3):323-333.
42. Cannizzaro G, Felice P, Gherlone E, Barausse C, Ferri V, Leone M, Trullenque-Eriksson A, Esposito M. Immediate loading of two (fixed-on-2) vs four (fixed-on-4) implants placed with a flapless technique supporting mandibular cross-arch fixed prostheses: 3-year results from a pilot randomised controlled trial. *Eur J Oral Implantol*. 2017;10(2):133-145.
43. Cannizzaro G, Felice P, Leone M, Ferri V, Viola P, Esposito M. Immediate versus early loading of 6.5 mm-long flapless-placed single implants: a 4-year after loading report of a split-mouth randomised controlled trial. *Eur J Oral Implantol*. 2012 Summer;5(2):111-21.
44. Cannizzaro G, Felice P, Loi I, Viola P, Ferri V, Leone M, Lazzarini M, Trullenque-Eriksson A, Esposito M. Machined versus roughened immediately loaded and finally restored single implants inserted flapless: Preliminary 6-month data from a split- mouth randomised controlled trial. *Eur J Oral Implantol*. 2016;9 Suppl 1(2):155-63.

45. Cannizzaro G, Felice P, Trullenque-Eriksson A, Lazzarini M, Velasco-Ortega E, Esposito M. Immediate vs early loading of 6.6 mm flapless-placed single implants: 9 years after-loading report of a split-mouth randomised controlled trial. *Eur J Oral Implantol*. 2018;11(2):163-173.
46. Cannizzaro G, Leone M, Esposito M. Immediate versus early loading of two implants placed with a flapless technique supporting mandibular bar-retained overdentures: a single-blinded, randomised controlled clinical trial. *Eur J Oral Implantol*. 2008 Spring;1(1):33-43.
47. Cannizzaro G, Leone M. Restoration of partially edentulous patients using dental implants with a microtextured surface: a prospective comparison of delayed and immediate full occlusal loading. *Int J Oral Maxillofac Implants*. 2003 Jul-Aug;18(4):512-22.
48. Cannizzaro G, Loi I, Viola P, Ferri V, Leone M, Trullenque-Eriksson A, Esposito M. Immediate loading of two (fixed-on-2) versus three (fixed-on-3) implants placed flapless supporting cross-arch fixed prostheses: One-year results from a randomised controlled trial. *Eur J Oral Implantol*. 2016;9 Suppl 1(2):143-53.
49. Canullo L, Peñarrocha D, Peñarrocha M, Rocio AG, Penarrocha-Diago M. Piezoelectric vs. conventional drilling in implant site preparation: pilot controlled randomized clinical trial with crossover design. *Clin Oral Implants Res*. 2014 Dec;25(12):1336-43.
50. Capparé P, Teté G, Romanos GE, Nagni M, Sannino G, Gherlone EF. The 'All-on-four' protocol in HIV-positive patients: A prospective, longitudinal 7-year clinical study. *Int J Oral Implantol (Berl)*. 2019;12(4):501-510.
51. Carr AB, Arwani N, Lohse CM, Gonzalez RLV, Muller OM, Salinas TJ. Early Implant Failure Associated With Patient Factors, Surgical Manipulations, and Systemic Conditions. *J Prosthodont*. 2019 Jul;28(6):623-633.
52. Cavalcanti R, Oreglia F, Manfredonia MF, Gianserra R, Esposito M. The influence of smoking on the survival of dental implants: a 5-year pragmatic multicentre retrospective cohort study of 1727 patients. *Eur J Oral Implantol*. 2011 Spring;4(1):39-45.
53. Cha HS, Kim A, Nowzari H, Chang HS, Ahn KM. Simultaneous sinus lift and implant installation: prospective study of consecutive two hundred seventeen sinus lift and four hundred sixty-two implants. *Clin Implant Dent Relat Res*. 2014 Jun;16(3):337-47.
54. Chang LC. Risk factors associated with early failure of maxillary versus mandibular implants: A retrospective study. *Int J Oral Implantol (Berl)*. 2020;13(1):55-63.
55. Chiapasco M, Tommasato G, Palombo D, Del Fabbro M. A retrospective 10-year mean follow-up of implants placed in ridges grafted using autogenous mandibular blocks covered with bovine bone mineral and collagen membrane. *Clin Oral Implants Res*. 2020 Apr;31(4):328-340.
56. Chiapasco M, Tommasato G, Palombo D, Scarnò D, Zaniboni M, Del Fabbro M. Dental implants placed in severely atrophic jaws reconstructed with autogenous calvarium, bovine bone mineral, and collagen membranes: A 3- to 19-year retrospective follow-up study. *Clin Oral Implants Res*. 2018 Jul;29(7):725-740.
57. Chrcanovic BR, Kisch J, Albrektsson T, Wennerberg A. A retrospective study on clinical and radiological outcomes of oral implants in patients followed up for a minimum of 20 years. *Clin Implant Dent Relat Res*. 2018 Apr;20(2):199-207.
58. Chrcanovic BR, Kisch J, Albrektsson T, Wennerberg A. Analysis of risk factors for cluster behavior of dental implant failures. *Clin Implant Dent Relat Res*. 2017 Aug;19(4):632-642.
59. Chrcanovic BR, Kisch J, Albrektsson T, Wennerberg A. Intake of Proton Pump Inhibitors Is Associated with an Increased Risk of Dental Implant Failure. *Int J Oral Maxillofac Implants*. 2017 September/October;32(5):1097–1102.
60. Clauser C, Sforza NM, Menini I, Kalemaj Z, Buti J; Collaborators of Accademia Toscana di Ricerca Odontostomatologica (ATRO) IPI Group. Immediate Postextraction Single-Tooth Implants and Provisional Crowns in the Esthetic Area: 2-year Results of a Cohort Prospective Multicenter Study-Patient-Centered Outcomes. *Int J Oral Maxillofac Implants*. 2020 Jul/Aug;35(4):833-840.

61. Conrad HJ, Jung J, Barczak M, Basu S, Seong WJ. Retrospective cohort study of the predictors of implant failure in the posterior maxilla. *Int J Oral Maxillofac Implants*. 2011 Jan-Feb;26(1):154-62.
62. Corvino E, Pesce P, Camodeca F, Moses O, Iannello G, Canullo L. Clinical and radiological outcomes of implants with two different connection configurations: A randomised controlled trial. *Int J Oral Implantol (Berl)*. 2020;13(4):355-368.
63. Coskunses FM, Tak Ö. Clinical performance of narrow-diameter titanium-zirconium implants in immediately loaded fixed full-arch prostheses: a 2-year clinical study. *Int J Implant Dent*. 2021 Apr 16;7(1):30.
64. Crespi R, Fabris GBM, Crespi G, Toti P, Marconcini S, Covani U. Effects of different loading protocols on the bone remodeling volume of immediate maxillary single implants: A 2- to 3-year follow-up. *Int J Oral Maxillofac Implants*. 2019 July/August;34(4):953-962.
65. Cristalli MP, Marini R, La Monaca G, Sepe C, Tonoli F, Annibali S. Immediate loading of post-extractive single-tooth implants: a 1-year prospective study. *Clin Oral Implants Res*. 2015 Sep;26(9):1070-9.
66. Cucchi A, Vignudelli E, Franco S, Ghensi P, Malchiodi L, Corinaldesi G. Evaluation of Crestal Bone Loss Around Straight and Tilted Implants in Patients Rehabilitated by Immediate-Loaded Full-Arch All-on-4 or All-on-6: A Prospective Study. *J Oral Implantol*. 2019 Dec;45(6):434-443.
67. Daher FI, Abi-Aad HL, Dimassi HI, Cordioli G, Majzoub ZAK. Immediate versus conventional loading of variable-thread tapered implants supporting three- to four-unit fixed partial dentures in the posterior maxilla: 3-year results of a split-mouth randomised controlled trial. *Int J Oral Implantol (Berl)*. 2019;12(4):449-466.
68. Daneshvar SS, Matthews DC, Michuad PL, Ghiabi E. Success and Survival Rates of Dental Implants Restored at an Undergraduate Dental Clinic: A 13-Year Retrospective Study with a Mean Follow-up of 5.8 Years. *Int J Oral Maxillofac Implants*. 2016 Jul-Aug;31(4):870-5.
69. Daubert DM, Weinstein BF, Bordin S, Leroux BG, Flemming TF. Prevalence and predictive factors for peri-implant disease and implant failure: a cross-sectional analysis. *J Periodontol*. 2015 Mar;86(3):337-47.
70. De Bruyn H, Collaert B, Lindén U, Johansson C, Albrektsson T. Clinical outcome of Screw Vent implants. A 7-year prospective follow-up study. *Clin Oral Implants Res*. 1999 Apr;10(2):139-48.
71. De Bruyn H, Collaert B. The effect of smoking on early implant failure. *Clin Oral Implants Res*. 1994 Dec;5(4):260-4.
72. Degidi M, Nardi D, Piattelli A. 10-year prospective cohort follow-up of immediately restored XiVE implants. *Clin Oral Implants Res*. 2016 Jun;27(6):694-700.
73. Deli G, Petrone V, De Risi V, Tadic D, Zafiropoulos GG. Longitudinal implant stability measurements based on resonance frequency analysis after placement in healed or regenerated bone. *J Oral Implantol*. 2014 Aug;40(4):438-47.
74. D'haese J, Vervaeke S, Verbanck N, De Bruyn H. Clinical and radiographic outcome of implants placed using stereolithographic guided surgery: a prospective monocenter study. *Int J Oral Maxillofac Implants*. 2013 Jan-Feb;28(1):205-15.
75. Di Stefano DA, Piattelli A, Zaniol T, Iezzi G. Implant and Prosthetic Success Following Peri-implant Guided Bone Regeneration in the Esthetic Zone Using an Equine Cortical Bone Membrane and an Equine Enzyme-Treated Bone Graft: A Retrospective Study with 9-year Follow-Up. *Int J Oral Maxillofac Implants*. 2020 Jul/Aug;35(4):824-832.
76. Doan NV, Du Z, Reher P, Xiao Y. Flapless dental implant surgery: a retrospective study of 1,241 consecutive implants. *Int J Oral Maxillofac Implants*. 2014 May-Jun;29(3):650-8.
77. Donati M, Ekestubbe A, Lindhe J, Wennström JL. Marginal bone loss at implants with different surface characteristics - A 20-year follow-up of a randomized controlled clinical trial. *Clin Oral Implants Res*. 2018 May;29(5):480-487.

78. Donati M, La Scala V, Di Raimondo R, Speroni S, Testi M, Berglundh T. Marginal bone preservation in single-tooth replacement: a 5-year prospective clinical multicenter study. *Clin Implant Dent Relat Res*. 2015 Jun;17(3):425-34.
79. Donos N, Horvath A, Calciolari E, Mardas N. Immediate provisionalization of bone level implants with a hydrophilic surface. A five-year follow-up of a randomized controlled clinical trial. *Clin Oral Implants Res*. 2019 Feb;30(2):139-149.
80. Doyle SL, Hodges JS, Pesun IJ, Baisden MK, Bowles WR. Factors affecting outcomes for single-tooth implants and endodontic restorations. *J Endod*. 2007 Apr;33(4):399-402.
81. Engstrand P, Gröndahl K, Ohnrell LO, Nilsson P, Nannmark U, Brånemark PI. Prospective follow-up study of 95 patients with edentulous mandibles treated according to the Brånemark Novum concept. *Clin Implant Dent Relat Res*. 2003;5(1):3-10.
82. Feher B, Lettner S, Heinze G, Karg F, Ulm C, Gruber R, Kuchler U. An advanced prediction model for postoperative complications and early implant failure. *Clin Oral Implants Res*. 2020 Oct;31(10):928-935.
83. Felice P, Pistilli R, Barausse C, Trullenque-Eriksson A, Esposito M. Immediate non-occlusal loading of immediate post-extractive versus delayed placement of single implants in preserved sockets of the anterior maxilla: 1-year post-loading outcome of a randomised controlled trial. *Eur J Oral Implantol*. 2015 Winter;8(4):361-72.
84. Flores-Guillen J, Álvarez-Novoa C, Barbieri G, Martín C, Sanz M. Five-year outcomes of a randomized clinical trial comparing bone-level implants with either submerged or transmucosal healing. *J Clin Periodontol*. 2018 Jan;45(1):125-135.
85. Fonseca M, Molinero-Mourelle P, Forrer FA, Schnider N, Hicklin SP, Schimmel M, Brägger U. Clinical performance of implant crowns with customized zirconia abutments: A prospective cohort study with a 4.5- to 8.8-year follow-up. *Clin Oral Implants Res*. 2021 Jul;32(7):853-862.
86. Francetti L, Azzola F, Corbella S, Taschieri S, Del Fabbro M. Evaluation of clinical outcomes and bone loss around titanium implants with oxidized surface: six-year follow-up results from a prospective case series study. *Clin Implant Dent Relat Res*. 2014 Feb;16(1):81-8.
87. Francetti L, Cavalli N, Taschieri S, Corbella S. Ten years follow-up retrospective study on implant survival rates and prevalence of peri-implantitis in implant-supported full-arch rehabilitations. *Clin Oral Implants Res*. 2019 Mar;30(3):252-260.
88. Friberg B, Jemt T. Turned Brånemark System implants in wide and narrow edentulous maxillae: a retrospective clinical study. *Clin Implant Dent Relat Res*. 2008 May;10(2):78-85.
89. Gamper FB, Benic GI, Sanz-Martin I, Asgeirsson AG, Hämmerle CHF, Thoma DS. Randomized controlled clinical trial comparing one-piece and two-piece dental implants supporting fixed and removable dental prostheses: 4- to 6-year observations. *Clin Oral Implants Res*. 2017 Dec;28(12):1553-1559.
90. Gander T, Studer S, Studer G, Grätz KW, Bredell M. Medium-term outcome of Astra Tech implants in head and neck oncology patients. *Int J Oral Maxillofac Surg*. 2014 Nov;43(11):1381-5.
91. Gašperšič R, Dard M, Linder S, Oblak Č. One-Year Results Assessing the Performance of Prosthetic Rehabilitations in the Posterior Maxilla Supported by 4-mm Extrashort Implants Splinted to 10-mm Implants: A Prospective Case Series. *Int J Oral Maxillofac Implants*. 2021 Mar-Apr;36(2):371-378.
92. Geurs NC, Wang IC, Shulman LB, Jeffcoat MK. Retrospective radiographic analysis of sinus graft and implant placement procedures from the Academy of Osseointegration Consensus Conference on Sinus Grafts. *Int J Periodontics Restorative Dent*. 2001 Oct;21(5):517-23.
93. Ghazal SS, Huynh-Ba G, Aghaloo T, Dibart S, Froum S, O'Neal R, Cochran D. A Randomized, Controlled, Multicenter Clinical Study Evaluating The Crestal Bone Level Change Of SLActive Bone Level Ø 3.3 mm Implants Compared To SLActive Bone Level Ø 4.1 mm Implants For Single-Tooth Replacement. *Int J Oral Maxillofac Implants*. 2019 May/June;34(3):708–718.

94. Gherlone EF, Capparé P, Tecco S, Polizzi E, Pantaleo G, Gastaldi G, Grusovin MG. Implant Prosthetic Rehabilitation in Controlled HIV-Positive Patients: A Prospective Longitudinal Study with 1-Year Follow-Up. *Clin Implant Dent Relat Res*. 2016 Aug;18(4):725-34.
95. Gjølvd B, Kisch J, Mohammed DJH, Chrcanovic BR, Albrektsson T, Wennerberg A. Immediate Loading of Single Implants, Guided Surgery, and Intraoral Scanning: A Nonrandomized Study. *Int J Prosthodont*. 2020 Sep/Oct;33(5):513-522.
96. Gorman LM, Lambert PM, Morris HF, Ochi S, Winkler S. The effect of smoking on implant survival at second-stage surgery: DICRG Interim Report No. 5. Dental Implant Clinical Research Group. *Implant Dent*. 1994 Fall;3(3):165-8.
97. Göthberg C, Gröndahl K, Omar O, Thomsen P, Slotte C. Bone and soft tissue outcomes, risk factors, and complications of implant-supported prostheses: 5-Years RCT with different abutment types and loading protocols. *Clin Implant Dent Relat Res*. 2018 Jun;20(3):313-321.
98. Grandi T, Guazzi P, Samarani R, Garuti G, Grandi G. Immediate loading of two unsplinted implants retaining the existing complete mandibular denture in elderly edentulous patients: 1-year results from a multicentre prospective cohort study. *Eur J Oral Implantol*. 2012 Spring;5(1):61-8.
99. Grandi T, Guazzi P, Samarani R, Garuti G. Immediate positioning of definitive abutments versus repeated abutment replacements in immediately loaded implants: effects on bone healing at the 1-year follow-up of a multicentre randomised controlled trial. *Eur J Oral Implantol*. 2012 Spring;5(1):9-16.
100. Grandi T, Guazzi P, Samarani R, Grandi G. A 3-year report from a multicentre randomised controlled trial: immediately versus early loaded implants in partially edentulous patients. *Eur J Oral Implantol*. 2013 Autumn;6(3):217-24.
101. Grandi T, Guazzi P, Samarani R, Grandi G. Immediate loading of four (all-on-4) post-extractive implants supporting mandibular cross-arch fixed prostheses: 18-month follow-up from a multicentre prospective cohort study. *Eur J Oral Implantol*. 2012 Autumn;5(3):277-85.
102. Grandi T, Guazzi P, Samarani R, Maghaireh H, Grandi G. One abutment-one time versus a provisional abutment in immediately loaded post-extractive single implants: a 1-year follow-up of a multicentre randomised controlled trial. *Eur J Oral Implantol*. 2014 Summer;7(2):141-9.
103. Grandi T, Guazzi P, Samarani R, Tohme H, Khoury S, Sbricoli L, Grandi G, Esposito M. Immediate, early (3 weeks) and conventional loading (4 months) of single implants: Preliminary data at 1 year after loading from a pragmatic multicenter randomised controlled trial. *Eur J Oral Implantol*. 2015 Summer;8(2):115-26.
104. Grisar K, Sinha D, Schoenaers J, Dormaar T, Politis C. Retrospective Analysis of Dental Implants Placed Between 2012 and 2014: Indications, Risk Factors, and Early Survival. *Int J Oral Maxillofac Implants*. 2017 May/June;32(3):649–654.
105. Groenendijk E, Staas TA, Bronkhorst E, Raghoobar GM, Meijer GJ. Immediate implant placement and provisionalization: Aesthetic outcome 1 year after implant placement. A prospective clinical multicenter study. *Clin Implant Dent Relat Res*. 2020 Apr;22(2):193-200.
106. Grossmann Y, Levin L, Sadan A. A retrospective case series of implants used to restore partially edentulous patients with implant-supported removable partial dentures: 31-month mean follow-up results. *Quintessence Int*. 2008 Sep;39(8):665-71.
107. Grunder U, Gaberthuel T, Boitel N, Imoberdorf M, Meyenberg K, Andreoni C, Meier T. Evaluating the clinical performance of the Osseotite implant: defining prosthetic predictability. *Compend Contin Educ Dent*. 1999 Jul;20(7):628-33, 636, 638-40.
108. Guarnieri R, Di Nardo D, Gaimari G, Miccoli G, Testarelli L. Short vs. Standard Laser-Microgrooved Implants Supporting Single and Splinted Crowns: A Prospective Study with 3 Years Follow-Up. *J Prosthodont*. 2019 Feb;28(2):e771-e779.
109. Guarnieri R, Testarelli L, Zuffetti F, Bertani P, Testori T. Comparative Results of Single Implants With and Without Laser-Microgrooved Collar Placed and Loaded with Different Protocols: A Long-Term (7 to 10 years) Retrospective Multicenter Study. *Int J Oral Maxillofac Implants*. 2020 Jul/Aug;35(4):841-849.

110. Guida L, Annunziata M, Esposito U, Sirignano M, Torrisi P, Cecchinato D. 6-mm-short and 11-mm-long implants compared in the full-arch rehabilitation of the edentulous mandible: A 3-year multicenter randomized controlled trial. *Clin Oral Implants Res.* 2020 Jan;31(1):64-73.
111. Habsha E. Survival of osseointegrated dental implants in smokers and non-smokers Toronto: University of Toronto; 2000.
112. Hakam AE, Vila G, Duarte PM, Mbadu MP, Ai Angary DS, Shuwaikan H, Aukhil I, Neiva R, da Silva HDP, Chang J. Effects of different antidepressant classes on dental implant failure: A retrospective clinical study. *J Periodontol.* 2021 Feb;92(2):196-204.
113. Han J, Tang Z, Zhang X, Meng H. A prospective, multi-center study assessing early loading with short implants in posterior regions. A 3-year post-loading follow-up study. *Clin Implant Dent Relat Res.* 2018 Feb;20(1):34-42.
114. Hartlev J, Schou S, Isidor F, Nørholt SE. A clinical and radiographic study of implants placed in autogenous bone grafts covered by either a platelet-rich fibrin membrane or deproteinised bovine bone mineral and a collagen membrane: a pilot randomised controlled clinical trial with a 2-year follow-up. *Int J Implant Dent.* 2021 Feb 8;7(1):8.
115. Hattingh A, De Bruyn H, Vandeweghe S. A retrospective study on ultra-wide diameter dental implants for immediate molar replacement. *Clin Implant Dent Relat Res.* 2019 Oct;21(5):879-887.
116. Hattingh A, Hommez G, De Bruyn H, Huyghe M, Vandeweghe S. A prospective study on ultra-wide diameter dental implants for immediate molar replacement. *Clin Implant Dent Relat Res.* 2018 Dec;20(6):1009-1015.
117. He J, Zhao B, Deng C, Shang D, Zhang C. Assessment of implant cumulative survival rates in sites with different bone density and related prognostic factors: an 8-year retrospective study of 2,684 implants. *Int J Oral Maxillofac Implants.* 2015 Mar-Apr;30(2):360-71.
118. Higuchi K, Rosenberg R, Davó R, Albanese M, Liddel G. A Prospective Single-Cohort Multicenter Study of an Innovative Prefabricated Three-Implant-Supported Full-Arch Prosthesis for Treatment of Edentulous Mandible: 1-year Report. *Int J Oral Maxillofac Implants.* 2020 Jan/Feb;35(1):150-159.
119. Hingsammer L, Pommer B, Fürhauser R, Mailath-Pokorny G, Haas R, Busenlechner D. Single tooth implants in the esthetic zone following a two-stage all flapless approach: A retrospective analysis. *Clin Implant Dent Relat Res.* 2018 Dec;20(6):929-936.
120. Hinze M, Thalmeier T, Bolz W, Wachtel H. Immediate loading of fixed provisional prostheses using four implants for the rehabilitation of the edentulous arch: a prospective clinical study. *Int J Oral Maxillofac Implants.* 2010 Sep-Oct;25(5):1011-8.
121. Hof M, Pommer B, Ambros H, Jesch P, Vogl S, Zechner W. Does Timing of Implant Placement Affect Implant Therapy Outcome in the Aesthetic Zone? A Clinical, Radiological, Aesthetic, and Patient-Based Evaluation. *Clin Implant Dent Relat Res.* 2015 Dec;17(6):1188-99.
122. Holahan CM, Koka S, Kennel KA, Weaver AL, Assad DA, Regennitter FJ, Kademani D. Effect of osteoporotic status on the survival of titanium dental implants. *Int J Oral Maxillofac Implants.* 2008 Sep-Oct;23(5):905-10.
123. Horwitz J, Levin L, Gabay E, Zuabi O, Machtei EE. Immediate restoration of delayed placement of dental implants in patients with treated periodontal disease: 1-year results. *Int J Oral Maxillofac Implants.* 2012 Nov-Dec;27(6):1569-75.
124. Hsu YT, Chan HL, Rudek I, Bashutski J, Oh WS, Wang HL, Oh TJ. Comparison of Clinical and Radiographic Outcomes of Platform-Switched Implants with a Rough Collar and Platform-Matched Implants with a Smooth Collar: A 1-Year Randomized Clinical Trial. *Int J Oral Maxillofac Implants.* 2016 Mar-Apr;31(2):382-90.
125. Hu C, Lang NP, Ong MM, Lim LP, Tan WC. Influence of periodontal maintenance and periodontitis susceptibility on implant success: A 5-year retrospective cohort on moderately rough surfaced implants. *Clin Oral Implants Res.* 2020 Aug;31(8):727-736.
126. Ibañez JC, Tahhan MJ, Zamar JA, Menendez AB, Juaneda AM, Zamar NJ, Monquaut JL. Immediate occlusal loading of double acid-etched surface titanium implants in 41 consecutive



- full-arch cases in the mandible and maxilla: 6- to 74-month results. *J Periodontol.* 2005 Nov;76(11):1972-81.
127. Ibañez JC, Tahhan MJ, Zamar JA. Performance of double acid-etched surface external hex titanium implants in relation to one- and two-stage surgical procedures. *J Periodontol.* 2003 Nov;74(11):1575-81.
  128. Iorio-Siciliano V, Marenzi G, Blasi A, Mignogna J, Cafiero C, Wang HL, Sammartino G. Influence of Platform-Switched, Laser-Microtextured Implant on Marginal Bone Level: A 24-Month Case Series Study. *Int J Oral Maxillofac Implants.* 2016 Jan-Feb;31(1):162-6.
  129. Ji TJ, Kan JY, Rungcharassaeng K, Roe P, Lozada JL. Immediate loading of maxillary and mandibular implant-supported fixed complete dentures: a 1- to 10-year retrospective study. *J Oral Implantol.* 2012 Sep;38 Spec No:469-76.
  130. Jones JD, Lupori J, Van Sickels JE, Gardner W. A 5-year comparison of hydroxyapatite-coated titanium plasma-sprayed and titanium plasma-sprayed cylinder dental implants. *Oral Surg Oral Med Oral Pathol Oral Radiol Endod.* 1999 Jun;87(6):649-52.
  131. Kan JY, Rungcharassaeng K, Lozada JL, Goodacre CJ. Effects of smoking on implant success in grafted maxillary sinuses. *J Prosthet Dent.* 1999 Sep;82(3):307-11.
  132. Karoussis IK, Salvi GE, Heitz-Mayfield LJ, Brägger U, Hämmerle CH, Lang NP. Long-term implant prognosis in patients with and without a history of chronic periodontitis: a 10-year prospective cohort study of the ITI Dental Implant System. *Clin Oral Implants Res.* 2003 Jun;14(3):329-39.
  133. Keller EE, Tolman DE, Eckert SE. Maxillary antral-nasal inlay autogenous bone graft reconstruction of compromised maxilla: a 12-year retrospective study. *Int J Oral Maxillofac Implants.* 1999 Sep-Oct;14(5):707-21.
  134. Khouly I, Pardiñas López S, Aliaga I, Froum SJ. Long-Term Implant Survival After 100 Maxillary Sinus Augmentations Using Plasma Rich in Growth Factors. *Implant Dent.* 2017 Apr;26(2):199-208.
  135. Kim SY, Dodson TB, Do DT, Wadhwa G, Chuang SK. Factors Associated With Crestal Bone Loss Following Dental Implant Placement in a Longitudinal Follow-up Study. *J Oral Implantol.* 2015 Oct;41(5):579-85.
  136. Kinsel RP, Liss M. Retrospective analysis of 56 edentulous dental arches restored with 344 single-stage implants using an immediate loading fixed provisional protocol: statistical predictors of implant failure. *Int J Oral Maxillofac Implants.* 2007 Sep-Oct;22(5):823-30.
  137. Klotz AL, Ott L, Krisam J, Schmitz S, Seyidaliyeva A, Rammelsberg P, Zenthöfer A. Short-term performance of implant-supported restorations fitted in general dental practice: A retrospective study. *Int J Oral Maxillofac Implants.* 2019 September/October;34(5):1169–1176.
  138. Kolerman R, Mijiritsky E, Barnea E, Dabaja A, Nissan J, Tal H. Esthetic Assessment of Implants Placed into Fresh Extraction Sockets for Single-Tooth Replacements Using a Flapless Approach. *Clin Implant Dent Relat Res.* 2017 Apr;19(2):351-364.
  139. Komiyama A, Klinge B, Hultin M. Treatment outcome of immediately loaded implants installed in edentulous jaws following computer-assisted virtual treatment planning and flapless surgery. *Clin Oral Implants Res.* 2008 Jul;19(7):677-85.
  140. Krennmair S, Hunger S, Forstner T, Malek M, Krennmair G, Stimmelmayer M. Implant health and factors affecting peri-implant marginal bone alteration for implants placed in staged maxillary sinus augmentation: A 5-year prospective study. *Clin Implant Dent Relat Res.* 2019 Feb;21(1):32-41.
  141. Krennmair S, Weinländer M, Malek M, Forstner T, Krennmair G, Stimmelmayer M. Mandibular Full-Arch Fixed Protheses Supported on 4 Implants with Either Axial Or Tilted Distal Implants: A 3-Year Prospective Study. *Clin Implant Dent Relat Res.* 2016 Dec;18(6):1119-1133.
  142. Kumar A, Jaffin RA, Berman C. The effect of smoking on achieving osseointegration of surface-modified implants: a clinical report. *Int J Oral Maxillofac Implants.* 2002 Nov-Dec;17(6):816-9.
  143. Lambert PM, Morris HF, Ochi S. The influence of smoking on 3-year clinical success of osseointegrated dental implants. *Ann Periodontol.* 2000 Dec;5(1):79-89.

144. Le BT, Follmar T, Borzabadi-Farahani A. Assessment of short dental implants restored with single-unit nonsplinted restorations. *Implant Dent*. 2013 Oct;22(5):499-502.
145. Lee CT, Sanz-Miralles E, Zhu L, Glick J, Heath A, Stoupel J. Predicting bone and soft tissue alterations of immediate implant sites in the esthetic zone using clinical parameters. *Clin Implant Dent Relat Res*. 2020 Jun;22(3):325-332.
146. Lee CT, Tran D, Jeng MD, Shen YT. Survival rates of hybrid rough surface implants and their alveolar bone level alterations. *J Periodontol*. 2018 Dec;89(12):1390-1399.
147. Leventi E, Malden NJ, Lopes VR. Periimplant bone-level reduction in relation to hydroxyapatite-coated dental implants that act as mandibular overdenture retainers: results at 6 to 10 years. *J Prosthet Dent*. 2014 Oct;112(4):792-7.
148. Levin L, Hertzberg R, Har-Nes S, Schwartz-Arad D. Long-term marginal bone loss around single dental implants affected by current and past smoking habits. *Implant Dent*. 2008 Dec;17(4):422-9.
149. Levin L, Ofec R, Grossmann Y, Anner R. Periodontal disease as a risk for dental implant failure over time: a long-term historical cohort study. *J Clin Periodontol*. 2011 Aug;38(8):732-7.
150. Lin TH, Chen L, Cha J, Jeffcoat M, Kao DW, Nevins M, Fiorellini JP. The effect of cigarette smoking and native bone height on dental implants placed immediately in sinuses grafted by hydraulic condensation. *Int J Periodontics Restorative Dent*. 2012 Jun;32(3):255-61.
151. Lindquist LW, Carlsson GE, Jemt T. Association between marginal bone loss around osseointegrated mandibular implants and smoking habits: a 10-year follow-up study. *J Dent Res*. 1997 Oct;76(10):1667-74.
152. Lini F, Poli PP, Beretta M, Cortinovis I, Maiorana C. Long-term retrospective observational cohort study on the survival rate of stepped screw titanium implants followed up to 20 years. *Int J Oral Maxillofac Implants*. 2019 July/August;34(4):999-1006.
153. Lobato RPB, Kinalski MA, Martins TM, Agostini BA, Bergoli CD, Dos Santos MBF. Influence of low-level laser therapy on implant stability in implants placed in fresh extraction sockets: A randomized clinical trial. *Clin Implant Dent Relat Res*. 2020 Jun;22(3):261-269.
154. Locante WM. Single-tooth replacements in the esthetic zone with an immediate function implant: a preliminary report. *J Oral Implantol*. 2004;30(6):369-75.
155. Lombardo G, Signoriello A, Simancas-Pallares M, Marincola M, Nocini PF. Survival of Short and Ultra-Short Locking-Taper Implants Supporting Single Crowns in the Posterior Mandible: A 3-Year Retrospective Study. *J Oral Implantol*. 2020 Aug 1;46(4):396-406.
156. Luongo R, Sgaramella N, Traini T, Bugea C. Graftless Maxillary Sinus Floor Augmentation with Simultaneous Porcine Bone Layer Insertion: A 1- to 5-Year Follow-up Study. *Int J Oral Maxillofac Implants*. 2020 Jul/Aug;35(4):808-815.
157. Malchiodi L, Balzani L, Cucchi A, Ghensi P, Nocini PF. Primary and Secondary Stability of Implants in Postextraction and Healed Sites: A Randomized Controlled Clinical Trial. *Int J Oral Maxillofac Implants*. 2016 Nov/Dec;31(6):1435-1443.
158. Malchiodi L, Cucchi A, Ghensi P, Consonni D, Nocini PF. Influence of crown-implant ratio on implant success rates and crestal bone levels: a 36-month follow-up prospective study. *Clin Oral Implants Res*. 2014 Feb;25(2):240-51.
159. Maló P, de Araújo Nobre M, Lopes A, Ferro A, Botto J. The All-on-4 treatment concept for the rehabilitation of the completely edentulous mandible: A longitudinal study with 10 to 18 years of follow-up. *Clin Implant Dent Relat Res*. 2019 Aug;21(4):565-577.
160. Maló P, de Araújo Nobre M, Lopes A, Ferro A, Nunes M. The All-on-4 concept for full-arch rehabilitation of the edentulous maxillae: A longitudinal study with 5-13 years of follow-up. *Clin Implant Dent Relat Res*. 2019 Aug;21(4):538-549.
161. Maló P, Nobre Md, Lopes A. Immediate loading of 'All-on-4' maxillary prostheses using trans-sinus tilted implants without sinus bone grafting: a retrospective study reporting the 3-year outcome. *Eur J Oral Implantol*. 2013 Autumn;6(3):273-83.

162. Mastrangelo F, Gastaldi G, Vinci R, Troiano G, Tettamanti L, Gherlone E, Lo Muzio L. Immediate Postextractive Implants With and Without Bone Graft: 3-year Follow-up Results From a Multicenter Controlled Randomized Trial. *Implant Dent*. 2018 Dec;27(6):638-645.
163. Mayfield LJ, Skoglund A, Hising P, Lang NP, Attström R. Evaluation following functional loading of titanium fixtures placed in ridges augmented by deproteinized bone mineral. A human case study. *Clin Oral Implants Res*. 2001 Oct;12(5):508-14.
164. McCarthy C, Patel RR, Wragg PF, Brook IM. Sinus augmentation bone grafts for the provision of dental implants: report of clinical outcome. *Int J Oral Maxillofac Implants*. 2003 May-Jun;18(3):377-82.
165. Mendonça JA, Francischone CE, Senna PM, Matos de Oliveira AE, Sotto-Maior BS. A retrospective evaluation of the survival rates of splinted and non-splinted short dental implants in posterior partially edentulous jaws. *J Periodontol*. 2014 Jun;85(6):787-94.
166. Merli M, Bianchini E, Mariotti G, Moscatelli M, Piemontese M, Rappelli G, Nieri M. Ceramic vs composite veneering of full arch implant-supported zirconium frameworks: assessing patient preference and satisfaction. A crossover double-blind randomised controlled trial. *Eur J Oral Implantol*. 2017;10(3):311-322.
167. Merli M, Merli M, Mariotti G, Pagliaro U, Moscatelli M, Nieri M. Immediate versus early non-occlusal loading of dental implants placed flapless in partially edentulous patients: A 10-year randomized clinical trial. *J Clin Periodontol*. 2020 May;47(5):621-629.
168. Mertens C, Steveling HG, Stucke K, Pretzl B, Meyer-Bäumer A. Fixed implant-retained rehabilitation of the edentulous maxilla: 11-year results of a prospective study. *Clin Implant Dent Relat Res*. 2012 Dec;14(6):816-27.
169. Migliorati M, Amorfini L, Signori A, Biavati AS, Benedicenti S. Clinical and Aesthetic Outcome with Post-Extractive Implants with or without Soft Tissue Augmentation: A 2-Year Randomized Clinical Trial. *Clin Implant Dent Relat Res*. 2015 Oct;17(5):983-95.
170. Mijiritsky E, Barbu H, Lorean A, Shohat I, Danza M, Levin L. Use of Implant-Derived Minimally Invasive Sinus Floor Elevation: A Multicenter Clinical Observational Study With 12- to 65-Month Follow-Up. *J Oral Implantol*. 2016 Aug;42(4):343-8.
171. Mijiritsky E, Lorean A, Mazor Z, Levin L. Implant Tooth-Supported Removable Partial Denture with at Least 15-Year Long-Term Follow-Up. *Clin Implant Dent Relat Res*. 2015 Oct;17(5):917-22.
172. Mijiritsky E, Mazor Z, Lorean A, Levin L. Implant diameter and length influence on survival: interim results during the first 2 years of function of implants by a single manufacturer. *Implant Dent*. 2013 Aug;22(4):394-8.
173. Minsk L, Polson AM, Weisgold A, Rose LF, Sanavi F, Baumgarten H, Listgarten MA. Outcome failures of endosseous implants from a clinical training center. *Compend Contin Educ Dent*. 1996 Sep;17(9):848-50, 852-4, 856 passim.
174. Mir-Mari J, Mir-Orfila P, Valmaseda-Castellón E, Gay-Escoda C. Long-term marginal bone loss in 217 machined-surface implants placed in 68 patients with 5 to 9 years of follow-up: a retrospective study. *Int J Oral Maxillofac Implants*. 2012 Sep-Oct;27(5):1163-9.
175. Moheng P, Feryn JM. Clinical and biologic factors related to oral implant failure: a 2-year follow-up study. *Implant Dent*. 2005 Sep;14(3):281-8.
176. Moráquez O, Vailati F, Grütter L, Sailer I, Belser UC. Four-unit fixed dental prostheses replacing the maxillary incisors supported by two narrow-diameter implants - a five-year case series. *Clin Oral Implants Res*. 2017 Jul;28(7):887-892.
177. Morales-Vadillo R, Leite FP, Guevara-Canales J, Netto HD, Miranda Chaves Md, Cruz F, Cruz G, Cruz-Pierce S, Cruz M. Retrospective study of the survival and associated risk factors of wedge-shaped implants. *Int J Oral Maxillofac Implants*. 2013 May-Jun;28(3):875-82.
178. Mordenfeld A, Albrektsson T, Hallman M. A 10-year clinical and radiographic study of implants placed after maxillary sinus floor augmentation with an 80:20 mixture of deproteinized bovine bone and autogenous bone. *Clin Implant Dent Relat Res*. 2014 Jun;16(3):435-46.

179. Mundt T, Mack F, Schwahn C, Biffar R. Private practice results of screw-type tapered implants: survival and evaluation of risk factors. *Int J Oral Maxillofac Implants*. 2006 Jul-Aug;21(4):607-14.
180. Muñoz M, Busoms E, Vilarrasa J, Albertini M, Ruíz-Magaz V, Nart J. Bone-level changes around implants with 1- or 3-mm-high abutments and their relation to crestal mucosal thickness: A 1-year randomized clinical trial. *J Clin Periodontol*. 2021 Oct;48(10):1302-1311.
181. Naeini EN, Dierens M, Atashkadeh M, De Bruyn H. Long-term clinical outcome of single implants inserted flaplessly or conventionally. *Clin Implant Dent Relat Res*. 2018 Oct;20(5):829-837.
182. Nedir R, Bischof M, Briaux JM, Beyer S, Szmukler-Moncler S, Bernard JP. A 7-year life table analysis from a prospective study on ITI implants with special emphasis on the use of short implants. Results from a private practice. *Clin Oral Implants Res*. 2004 Apr;15(2):150-7.
183. Niedermaier R, Stelzle F, Riemann M, Bolz W, Schuh P, Wachtel H. Implant-Supported Immediately Loaded Fixed Full-Arch Dentures: Evaluation of Implant Survival Rates in a Case Cohort of up to 7 Years. *Clin Implant Dent Relat Res*. 2017 Feb;19(1):4-19.
184. Nitzan D, Mamlider A, Levin L, Schwartz-Arad D. Impact of smoking on marginal bone loss. *Int J Oral Maxillofac Implants*. 2005 Jul-Aug;20(4):605-9.
185. Noelken R, Pausch T, Wagner W, Al-Nawas B. Peri-implant defect grafting with autogenous bone or bone graft material in immediate implant placement in molar extraction sites-1- to 3-year results of a prospective randomized study. *Clin Oral Implants Res*. 2020 Nov;31(11):1138-1148.
186. Nogueira TE, Aguiar FMO, de Barcelos BA, Leles CR. A 2-year prospective study of single-implant mandibular overdentures: Patient-reported outcomes and prosthodontic events. *Clin Oral Implants Res*. 2018 Jun;29(6):541-550.
187. Noguerol B, Muñoz R, Mesa F, de Dios Luna J, O'Valle F. Early implant failure. Prognostic capacity of Periotest: retrospective study of a large sample. *Clin Oral Implants Res*. 2006 Aug;17(4):459-64.
188. Norton MR. The Influence of Low Insertion Torque on Primary Stability, Implant Survival, and Maintenance of Marginal Bone Levels: A Closed-Cohort Prospective Study. *Int J Oral Maxillofac Implants*. 2017 Jul/Aug;32(4):849-857.
189. Nyström E, Nilson H, Gunne J, Lundgren S. Reconstruction of the atrophic maxilla with interpositional bone grafting/Le Fort I osteotomy and endosteal implants: a 11-16 year follow-up. *Int J Oral Maxillofac Surg*. 2009 Jan;38(1):1-6.
190. Oliva J, Oliva X, Oliva JD. All-on-three delayed implant loading concept for the completely edentulous maxilla and mandible: a retrospective 5-year follow-up study. *Int J Oral Maxillofac Implants*. 2012 Nov-Dec;27(6):1584-92.
191. Olmedo-Gaya MV, Manzano-Moreno FJ, Cañaveral-Cavero E, de Dios Luna-del Castillo J, Vallecillo-Capilla M. Risk factors associated with early implant failure: A 5-year retrospective clinical study. *J Prosthet Dent*. 2016 Feb;115(2):150-5.
192. Olson JW, Dent CD, Morris HF, Ochi S. Long-term assessment (5 to 71 months) of endosseous dental implants placed in the augmented maxillary sinus. *Ann Periodontol*. 2000 Dec;5(1):152-6.
193. Omran MT, Miley DD, McLeod DE, Garcia MN. Retrospective assessment of survival rate for short endosseous dental implants. *Implant Dent*. 2015 Apr;24(2):185-91.
194. Park WB, Kang KL, Han JY. Factors influencing long-term survival rates of implants placed simultaneously with lateral maxillary sinus floor augmentation: A 6- to 20-year retrospective study. *Clin Oral Implants Res*. 2019 Oct;30(10):977-988.
195. Patil PG, Seow LL. Crestal bone-level changes and patient satisfaction with mandibular overdentures retained by one or two implants with immediate loading protocols: A randomized controlled clinical study. *J Prosthet Dent*. 2020 May;123(5):710-716.
196. Peleg M, Garg AK, Mazor Z. Healing in smokers versus nonsmokers: survival rates for sinus floor augmentation with simultaneous implant placement. *Int J Oral Maxillofac Implants*. 2006 Jul-Aug;21(4):551-9.

197. Peñarrocha D, Candel E, Guirado JL, Canullo L, Peñarrocha M. Implants placed in the nasopalatine canal to rehabilitate severely atrophic maxillae: a retrospective study with long follow-up. *J Oral Implantol*. 2014 Dec;40(6):699-706.
198. Peñarrocha-Oltra D, Peñarrocha-Diago M, Encinas RF, Ippolito DR, Xhanari E, Esposito M. Natural or palatal positioning of immediate post-extractive implants in the aesthetic zone? Three-year results of a multicentre randomised controlled trial. *Int J Oral Implantol (Berl)*. 2019;12(2):181-194.
199. Perez A, Caiazzo A, Valente NA, Toti P, Alfonsi F, Barone A. Standard vs customized healing abutments with simultaneous bone grafting for tissue changes around immediate implants. 1-year outcomes from a randomized clinical trial. *Clin Implant Dent Relat Res*. 2020 Feb;22(1):42-53.
200. Pico A, Martín-Lancharro P, Caneiro L, Nóvoa L, Batalla P, Blanco J. Influence of abutment height and implant depth position on interproximal peri-implant bone in sites with thin mucosa: A 1-year randomized clinical trial. *Clin Oral Implants Res*. 2019 Jul;30(7):595-602.
201. Pozzi A, Holst S, Fabbri G, Tallarico M. Clinical reliability of CAD/CAM cross-arch zirconia bridges on immediately loaded implants placed with computer-assisted/template-guided surgery: a retrospective study with a follow-up between 3 and 5 years. *Clin Implant Dent Relat Res*. 2015 Jan;17 Suppl 1:e86-96.
202. Pozzi A, Moy PK. Minimally invasive transcrestal guided sinus lift (TGSL): a clinical prospective proof-of-concept cohort study up to 52 months. *Clin Implant Dent Relat Res*. 2014 Aug;16(4):582-93.
203. Pozzi A, Tallarico M, Moy PK. Four-implant overdenture fully supported by a CAD-CAM titanium bar: A single-cohort prospective 1-year preliminary study. *J Prosthet Dent*. 2016 Oct;116(4):516-523.
204. Pozzi A, Tallarico M, Moy PK. Three-year post-loading results of a randomised, controlled, split-mouth trial comparing implants with different prosthetic interfaces and design in partially posterior edentulous mandibles. *Eur J Oral Implantol*. 2014 Spring;7(1):47-61.
205. Prati C, Zamparini F, Pirani C, Montebugnoli L, Canullo L, Gandolfi MG. A Multilevel Analysis of Platform-Switching Flapless Implants Placed at Tissue Level: 4-year Prospective Cohort Study. *Int J Oral Maxillofac Implants*. 2020 Mar/Apr;35(2):330-341.
206. Queridinha BM, Almeida RF, Felino A, de Araújo Nobre M, Maló P. Partial Rehabilitation with Distally Tilted and Straight Implants in the Posterior Maxilla with Immediate Loading Protocol: A Retrospective Cohort Study with 5-Year Follow-up. *Int J Oral Maxillofac Implants*. 2016 Jul-Aug;31(4):891-9.
207. Raabe C, Monje A, Abou-Ayash S, Buser D, von Arx T, Chappuis V. Long-term effectiveness of 6 mm micro-rough implants in various indications: A 4.6- to 18.2-year retrospective study. *Clin Oral Implants Res*. 2021 Aug;32(8):1008-1018.
208. Raes F, Eccellente T, Lenzi C, Ortolani M, Luongo G, Mangano C, Mangano F. Immediate functional loading of single implants: a multicenter study with 4 years of follow-up. *J Dent Res Dent Clin Dent Prospects*. 2018 Winter;12(1):26-37.
209. Raes S, Rocci A, Raes F, Cooper L, De Bruyn H, Cosyn J. A prospective cohort study on the impact of smoking on soft tissue alterations around single implants. *Clin Oral Implants Res*. 2015 Sep;26(9):1086-90.
210. Ramaglia L, Sbordone C, Saviano R, Martuscelli R, Sbordone L. Marginal masticatory mucosa dimensional changes in immediate post-extractive implants: a 2 year prospective cohort study. *Clin Oral Implants Res*. 2015 Dec;26(12):1495-502.
211. Rasperini G, Siciliano VI, Cafiero C, Salvi GE, Blasi A, Aglietta M. Crestal bone changes at teeth and implants in periodontally healthy and periodontally compromised patients. A 10-year comparative case-series study. *J Periodontol*. 2014 Jun;85(6):e152-9.
212. Ravidà A, Barootchi S, Tattan M, Saleh MHA, Gargallo-Albiol J, Wang HL. Clinical outcomes and cost effectiveness of computer-guided versus conventional implant-retained hybrid prostheses:

- A long-term retrospective analysis of treatment protocols. *J Periodontol*. 2018 Sep;89(9):1015-1024.
213. Ravidà A, Tattan M, Askar H, Barootchi S, Tavelli L, Wang HL. Comparison of three different types of implant-supported fixed dental prostheses: A long-term retrospective study of clinical outcomes and cost-effectiveness. *Clin Oral Implants Res*. 2019 Apr;30(4):295-305.
  214. Rocuzzo M, Grasso G, Dalmasso P. Keratinized mucosa around implants in partially edentulous posterior mandible: 10-year results of a prospective comparative study. *Clin Oral Implants Res*. 2016 Apr;27(4):491-6.
  215. Rodriguez-Argueta OF, Figueiredo R, Valmaseda-Castellon E, Gay-Escoda C. Postoperative complications in smoking patients treated with implants: a retrospective study. *J Oral Maxillofac Surg*. 2011 Aug;69(8):2152-7.
  216. Romandini M, Cordaro M, Donno S, Cordaro L. Discrepancy between patient satisfaction and biologic complication rate in patients rehabilitated with overdentures and not participating in a structured maintenance program after 7 to 12 years of loading. *Int J Oral Maxillofac Implants*. 2019 September/October;34(5):1143-1151.
  217. Romanos GE, Gaertner K, Aydin E, Nentwig GH. Long-term results after immediate loading of platform-switched implants in smokers versus nonsmokers with full-arch restorations. *Int J Oral Maxillofac Implants*. 2013 May-Jun;28(3):841-5.
  218. Romanos GE, Gaertner K, Nentwig GH. Long-term evaluation of immediately loaded implants in the edentulous mandible using fixed bridges and platform shifting. *Clin Implant Dent Relat Res*. 2014 Aug;16(4):601-8.
  219. Rosen PS, Sahlin H, Seemann R, Rosen AS. A 1-7 year retrospective follow-up on consecutively placed 7-mm-long dental implants with an electrowetted surface. *Int J Implant Dent*. 2018 Aug 23;4(1):24.
  220. Rosen PS, Summers R, Mellado JR, Salkin LM, Shanaman RH, Marks MH, Fugazzotto PA. The bone-added osteotome sinus floor elevation technique: multicenter retrospective report of consecutively treated patients. *Int J Oral Maxillofac Implants*. 1999 Nov-Dec;14(6):853-8.
  221. Rossi F, Lang NP, Ricci E, Ferraioli L, Baldi N, Botticelli D. Long-term follow-up of single crowns supported by short, moderately rough implants-A prospective 10-year cohort study. *Clin Oral Implants Res*. 2018 Dec;29(12):1212-1219.
  222. Rossi F, Lang NP, Ricci E, Ferraioli L, Marchetti C, Botticelli D. 6-mm-long implants loaded with fiber-reinforced composite resin-bonded fixed prostheses (FRCRBFDs). A 5-year prospective study. *Clin Oral Implants Res*. 2017 Dec;28(12):1478-1483.
  223. Salman A, Thacker S, Rubin S, Dhingra A, Ioannidou E, Schincaglia GP. Immediate versus delayed loading of mandibular implant-retained overdentures: A 60-month follow-up of a randomized clinical trial. *J Clin Periodontol*. 2019 Aug;46(8):863-871.
  224. Sánchez-Pérez A, Moya-Villaescusa MJ, Caffesse RG. Tobacco as a risk factor for survival of dental implants. *J Periodontol*. 2007 Feb;78(2):351-9.
  225. Sanna AM, Molly L, van Steenberghe D. Immediately loaded CAD-CAM manufactured fixed complete dentures using flapless implant placement procedures: a cohort study of consecutive patients. *J Prosthet Dent*. 2007 Jun;97(6):331-9.
  226. Sanz-Martín I, Sanz-Sánchez I, Noguerol F, Cok S, Ortiz-Vigón A, Sanz M. Randomized controlled clinical trial comparing two dental implants with different neck configurations. *Clin Implant Dent Relat Res*. 2017 Jun;19(3):512-522.
  227. Sayardoust S, Gröndahl K, Johansson E, Thomsen P, Slotte C. Implant survival and marginal bone loss at turned and oxidized implants in periodontitis-susceptible smokers and never-smokers: a retrospective, clinical, radiographic case-control study. *J Periodontol*. 2013 Dec;84(12):1775-82.
  228. Schlee M, Pradies G, Mehmke WU, Beneytout A, Stamm M, Meda RG, Kamm T, Poiroux F, Weinlich F, del Canto Pingarron M, Crichton E, Poulet JB, Bousquet P. Prospective, Multicenter Evaluation of Trabecular Metal-Enhanced Titanium Dental Implants Placed in Routine Dental

- Practices: 1-Year Interim Report From the Development Period (2010 to 2011). *Clin Implant Dent Relat Res*. 2015 Dec;17(6):1141-53.
229. Schmid E, Morandini M, Roccuzzo A, Ramseier CA, Sculean A, Salvi GE. Clinical and radiographic outcomes of implant-supported fixed dental prostheses with cantilever extension. A retrospective cohort study with a follow-up of at least 10 years. *Clin Oral Implants Res*. 2020 Dec;31(12):1243-1252.
  230. Schmid E, Roccuzzo A, Morandini M, Ramseier CA, Sculean A, Salvi GE. Clinical and radiographic evaluation of implant-supported single-unit crowns with cantilever extension in posterior areas: A retrospective study with a follow-up of at least 10 years. *Clin Implant Dent Relat Res*. 2021 Apr;23(2):189-196.
  231. Schneider D, Witt L, Hämmerle CHF. Influence of the crown-to-implant length ratio on the clinical performance of implants supporting single crown restorations: a cross-sectional retrospective 5-year investigation. *Clin Oral Implants Res*. 2012 Feb;23(2):169-174.
  232. Schoenbaum TR, Moy PK, Aghaloo T, Elashoff D. Risk Factors for Dental Implant Failure in Private Practice: A Multicenter Survival Analysis. *Int J Oral Maxillofac Implants*. 2021 Mar-Apr;36(2):388-394.
  233. Schwartz-Arad D, Grossman Y, Chaushu G. The clinical effectiveness of implants placed immediately into fresh extraction sites of molar teeth. *J Periodontol*. 2000 May;71(5):839-44.
  234. Schwartz-Arad D, Ofec R, Eliyahu G, Ruban A, Sterer N. Long Term Follow-Up of Dental Implants Placed in Autologous Onlay Bone Graft. *Clin Implant Dent Relat Res*. 2016 Jun;18(3):449-61.
  235. Schwartz-Arad D, Samet N, Samet N, Mamlider A. Smoking and complications of endosseous dental implants. *J Periodontol*. 2002 Feb;73(2):153-7.
  236. Shibuya Y, Takeuchi Y, Asai T, Takeuchi J, Suzuki H, Komori T. Maxillary sinus floor elevation combined with a vertical onlay graft. *Implant Dent*. 2012 Apr;21(2):91-6.
  237. Si M, Zhang Y, Li J, He F. Retrospective study on the clinical outcomes of small-diameter implants supporting fixed prostheses without bone augmentation in the posterior region after 2 to 12 years. *Clin Implant Dent Relat Res*. 2019 Jun;21(3):454-461.
  238. Si MS, Shou YW, Shi YT, Yang GL, Wang HM, He FM. Long-term outcomes of osteotome sinus floor elevation without bone grafts: a clinical retrospective study of 4-9 years. *Clin Oral Implants Res*. 2016 Nov;27(11):1392-1400.
  239. Sicilia A, Gallego L, Sicilia P, Mallo C, Cuesta S, Sanz M. Crestal bone loss associated with different implant surfaces in the posterior mandible in patients with a history of periodontitis. A retrospective study. *Clin Oral Implants Res*. 2021 Jan;32(1):88-99.
  240. Siebers D, Gehrke P, Schliephake H. Delayed function of dental implants: a 1- to 7-year follow-up study of 222 implants. *Int J Oral Maxillofac Implants*. 2010 Nov-Dec;25(6):1195-202.
  241. Simons WF, De Smit M, Duyck J, Coucke W, Quirynen M. The proportion of cancellous bone as predictive factor for early marginal bone loss around implants in the posterior part of the mandible. *Clin Oral Implants Res*. 2015 Sep;26(9):1051-9.
  242. Sivoilella S, Botticelli D, Prasad S, Ricci S, Bressan E, Prasad H. Evaluation and comparison of histologic changes and implant survival in extraction sites immediately grafted with two different xenografts: A randomized clinical pilot study. *Clin Oral Implants Res*. 2020 Sep;31(9):825-835.
  243. Souza CSV, Ortega-Lopes R, Barreno AC, de Moraes M, Albergaria-Barbosa JR, Nôia CF. Analysis of the Survival of Dental Implants Installed in Reconstructed Maxilla With Autogenous Iliac Crest Graft: 7- to 9-Year Follow-Up. *J Oral Implantol*. 2019 Dec;45(6):427-436.
  244. Stacchi C, Troiano G, Rapani A, Lombardi T, Sentineri R, Speroni S, Berton F, Di Lenarda R. Factors influencing the prevalence of peri-implantitis in implants inserted in augmented maxillary sinuses: A multicenter cross-sectional study. *J Periodontol*. 2021 Aug;92(8):1117-1125.
  245. Stoker G, van Waas R, Wismeijer D. Long-term outcomes of three types of implant-supported mandibular overdentures in smokers. *Clin Oral Implants Res*. 2012 Aug;23(8):925-9.

246. Strietzel FP, Karmon B, Lorean A, Fischer PP. Implant-prosthetic rehabilitation of the edentulous maxilla and mandible with immediately loaded implants: preliminary data from a retrospective study, considering time of implantation. *Int J Oral Maxillofac Implants*. 2011 Jan-Feb;26(1):139-47.
247. Sverzut AT, Stabile GA, de Moraes M, Mazzone R, Moreira RW. The influence of tobacco on early dental implant failure. *J Oral Maxillofac Surg*. 2008 May;66(5):1004-9.
248. Tallarico M, Canullo L, Pisano M, Peñarrocha-Oltra D, Peñarrocha-Diogo M, Meloni SM. An up to 7-Year Retrospective Analysis of Biologic and Technical Complication With the All-on-4 Concept. *J Oral Implantol*. 2016 Jun;42(3):265-71.
249. Tallarico M, Esposito M, Xhanari E, Caneva M, Meloni SM. Computer-guided vs freehand placement of immediately loaded dental implants: 5-year postloading results of a randomised controlled trial. *Eur J Oral Implantol*. 2018;11(2):203-213.
250. Tallarico M, Meloni SM. Retrospective Analysis on Survival Rate, Template-Related Complications, and Prevalence of Peri-implantitis of 694 Anodized Implants Placed Using Computer-Guided Surgery: Results Between 1 and 10 Years of Follow-Up. *Int J Oral Maxillofac Implants*. 2017 Sep/Oct;32(5):1162-1171.
251. Tartaglia GM, Maiorana C, Gallo M, Codari M, Sforza C. Implant-Supported Immediately Loaded Full-Arch Rehabilitations: Comparison of Resin and Zirconia Clinical Outcomes in a 5-Year Retrospective Follow-Up Study. *Implant Dent*. 2016 Feb;25(1):74-82.
252. Taschieri S, Lolato A, Testori T, Francetti L, Del Fabbro M. Short dental implants as compared to maxillary sinus augmentation procedure for the rehabilitation of edentulous posterior maxilla: Three-year results of a randomized clinical study. *Clin Implant Dent Relat Res*. 2018 Feb;20(1):9-20.
253. Tattan M, Puranam M, Cornick C, McBrearty C, Xie XJ, Caplan DJ, Avila-Ortiz G, Elangovan S. Surgery start time and early implant failure: A case-control study. *Clin Oral Implants Res*. 2021 Jul;32(7):871-880.
254. Tawil G, Younan R, Azar P, Sleilati G. Conventional and advanced implant treatment in the type II diabetic patient: surgical protocol and long-term clinical results. *Int J Oral Maxillofac Implants*. 2008 Jul-Aug;23(4):744-52.
255. Tealdo T, Menini M, Bevilacqua M, Pera F, Capalbo V, Pera P. Brånemark Novum immediate loading rehabilitation of edentulous mandibles: 11-year retrospective study. *Clin Oral Implants Res*. 2015 Jan;26(1):83-9.
256. Temmerman A, Keestra JA, Coucke W, Teughels W, Quirynen M. The outcome of oral implants placed in bone with limited bucco-oral dimensions: a 3-year follow-up study. *J Clin Periodontol*. 2015 Mar;42(3):311-8.
257. Testori T, Galli F, Fumagalli L, Capelli M, Zuffetti F, Deflorian M, Parenti A, Del Fabbro M. Assessment of Long-Term Survival of Immediately Loaded Tilted Implants Supporting a Maxillary Full-Arch Fixed Prosthesis. *Int J Oral Maxillofac Implants*. 2017 Jul/Aug;32(4):904-911.
258. Testori T, Taschieri S, Scutellà F, Del Fabbro M. Immediate Versus Delayed Loading of Postextraction Implants: A Long-Term Retrospective Cohort Study. *Implant Dent*. 2017 Dec;26(6):853-859.
259. Testori T, Wiseman L, Woolfe S, Porter SS. A prospective multicenter clinical study of the Osseotite implant: four-year interim report. *Int J Oral Maxillofac Implants*. 2001 Mar-Apr;16(2):193-200.
260. Testori T, Zuffetti F, Capelli M, Galli F, Weinstein RL, Del Fabbro M. Immediate versus conventional loading of post-extraction implants in the edentulous jaws. *Clin Implant Dent Relat Res*. 2014 Dec;16(6):926-35.
261. Thoma DS, Gasser TJW, Jung RE, Hämmerle CHF. Randomized controlled clinical trial comparing implant sites augmented with a volume-stable collagen matrix or an autogenous connective tissue graft: 3-year data after insertion of reconstructions. *J Clin Periodontol*. 2020 May;47(5):630-639.



262. Thoma DS, Haas R, Sporniak-Tutak K, Garcia A, Taylor TD, Hämmerle CHF. Randomized controlled multicentre study comparing short dental implants (6 mm) versus longer dental implants (11-15 mm) in combination with sinus floor elevation procedures: 5-Year data. *J Clin Periodontol*. 2018 Dec;45(12):1465-1474.
263. Thoma DS, Maggetti I, Waller T, Hämmerle CHF, Jung RE. Clinical and patient-reported outcomes of implants placed in autogenous bone grafts and implants placed in native bone: A case-control study with a follow-up of 5-16 years. *Clin Oral Implants Res*. 2019 Mar;30(3):242-251.
264. Troiano G, Luongo R, Romano DC, Galli M, Ravidà A, Wang HL, Laino L. Comparison of immediate versus delayed implant placement in a failed implant site: A retrospective analysis of early implant survival. *Int J Oral Implantol (Berl)*. 2021 Mar 16;14(1):67-76.
265. Twito D, Sade P. The effect of cigarette smoking habits on the outcome of dental implant treatment. *PeerJ*. 2014 Sep 2;2:e546.
266. Urdaneta RA, Daher S, Leary J, Emanuel KM, Chuang SK. The survival of ultrashort locking-taper implants. *Int J Oral Maxillofac Implants*. 2012 May-Jun;27(3):644-54.
267. Uribarri A, Bilbao E, Marichalar-Mendia X, Martínez-Conde R, Aguirre JM, Verdugo F. Bone Remodeling around Implants Placed in Augmented Sinuses in Patients with and without History of Periodontitis. *Clin Implant Dent Relat Res*. 2017 Apr;19(2):268-279.
268. van Steenberghe D, Molly L, Jacobs R, Vandekerckhove B, Quirynen M, Naert I. The immediate rehabilitation by means of a ready-made final fixed prosthesis in the edentulous mandible: a 1-year follow-up study on 50 consecutive patients. *Clin Oral Implants Res*. 2004 Jun;15(3):360-5.
269. Vandeweghe S, Ackermann A, Bronner J, Hattingh A, Tschakaloff A, De Bruyn H. A retrospective, multicenter study on a novo wide-body implant for posterior regions. *Clin Implant Dent Relat Res*. 2012 Apr;14(2):281-92.
270. Vandeweghe S, De Bruyn H. The effect of smoking on early bone remodeling on surface modified Southern Implants®. *Clin Implant Dent Relat Res*. 2011 Sep;13(3):206-14.
271. Vandeweghe S, Nicolopoulos C, Thevissen E, Jimbo R, Wennerberg A, De Bruyn H. Immediate loading of screw-retained all-ceramic crowns in immediate versus delayed single implant placement. *Int J Prosthodont*. 2013 Sep-Oct;26(5):458-64.
272. Vervaeke S, Collaert B, Cosyn J, Deschepper E, De Bruyn H. A multifactorial analysis to identify predictors of implant failure and peri-implant bone loss. *Clin Implant Dent Relat Res*. 2015 Jan;17 Suppl 1:e298-307.
273. Waechter J, Madruga MM, Carmo Filho LCD, Leite FRM, Schinestsck AR, Faot F. Comparison between tapered and cylindrical implants in the posterior regions of the mandible: A prospective, randomized, split-mouth clinical trial focusing on implant stability changes during early healing. *Clin Implant Dent Relat Res*. 2017 Aug;19(4):733-741.
274. Wagenberg B, Froum SJ. A retrospective study of 1925 consecutively placed immediate implants from 1988 to 2004. *Int J Oral Maxillofac Implants*. 2006 Jan-Feb;21(1):71-80.
275. Wagenberg BD, Froum SJ, Eckert SE. Long-term bone stability assessment around 1,187 immediately placed implants with 1- to 22-year follow-up. *Int J Oral Maxillofac Implants*. 2013 Mar-Apr;28(2):605-12.
276. Wallace RH. The relationship between cigarette smoking and dental implant failure. *Eur J Prosthodont Restor Dent*. 2000 Sep;8(3):103-6.
277. Wang F, Monje A, Huang W, Zhang Z, Wang G, Wu Y. Maxillary Four Implant-retained Overdentures via Locator® Attachment: Intermediate-term Results from a Retrospective Study. *Clin Implant Dent Relat Res*. 2016 Jun;18(3):571-9.
278. Wang J, Lerman G, Bittner N, Fan W, Lalla E, Papapanou PN. Immediate versus delayed temporization at posterior single implant sites: A randomized controlled trial. *J Clin Periodontol*. 2020 Oct;47(10):1281-1291.

279. Wennström JL, Ekestubbe A, Gröndahl K, Karlsson S, Lindhe J. Oral rehabilitation with implant-supported fixed partial dentures in periodontitis-susceptible subjects. A 5-year prospective study. *J Clin Periodontol*. 2004 Sep;31(9):713-24.
280. Werbelow L, Weiss M, Schramm A. Long-term follow-up of full-arch immediate implant-supported restorations in edentulous jaws: a clinical study. *Int J Implant Dent*. 2020 Jul 30;6(1):34.
281. Widmark G, Andersson B, Carlsson GE, Lindvall AM, Ivanoff CJ. Rehabilitation of patients with severely resorbed maxillae by means of implants with or without bone grafts: a 3- to 5-year follow-up clinical report. *Int J Oral Maxillofac Implants*. 2001 Jan-Feb;16(1):73-9.
282. Windael S, Collaert B, De Buyser S, De Bruyn H, Vervaeke S. Early peri-implant bone loss as a predictor for peri-implantitis: A 10-year prospective cohort study. *Clin Implant Dent Relat Res*. 2021 Jun;23(3):298-308.
283. Windael S, Vervaeke S, Wijnen L, Jacquet W, De Bruyn H, Collaert B. Ten-year follow-up of dental implants used for immediate loading in the edentulous mandible: A prospective clinical study. *Clin Implant Dent Relat Res*. 2018 Aug;20(4):515-521.
284. Wolf F, Spoerl S, Gottsauner M, Klingelhöffer C, Spanier G, Kolbeck C, Reichert TE, Hautmann MG, Ettl T. Significance of site-specific radiation dose and technique for success of implant-based prosthetic rehabilitation in irradiated head and neck cancer patients-A cohort study. *Clin Implant Dent Relat Res*. 2021 Jun;23(3):444-455.
285. Wu S, Wu X, Shrestha R, Lin J, Feng Z, Liu Y, Shi Y, Huang B, Li Z, Liu Q, Zhang X, Hu M, Chen Z. Clinical and Radiologic Outcomes of Submerged and Nonsubmerged Bone-Level Implants with Internal Hexagonal Connections in Immediate Implantation: A 5-Year Retrospective Study. *J Prosthodont*. 2018 Feb;27(2):101-107.
286. Wu X, Al-Abedalla K, Abi-Nader S, Daniel NG, Nicolau B, Tamimi F. Proton Pump Inhibitors and the Risk of Osseointegrated Dental Implant Failure: A Cohort Study. *Clin Implant Dent Relat Res*. 2017 Apr;19(2):222-232.
287. Wu X, Al-Abedalla K, Eimar H, Arekunnath Madathil S, Abi-Nader S, Daniel NG, Nicolau B, Tamimi F. Antihypertensive Medications and the Survival Rate of Osseointegrated Dental Implants: A Cohort Study. *Clin Implant Dent Relat Res*. 2016 Dec;18(6):1171-1182.
288. Wu X, Al-Abedalla K, Rastikerdar E, Abi Nader S, Daniel NG, Nicolau B, Tamimi F. Selective serotonin reuptake inhibitors and the risk of osseointegrated implant failure: a cohort study. *J Dent Res*. 2014 Nov;93(11):1054-61.
289. Zafiropoulos GG, Deli G, Bartee BK, Hoffmann O. Single-tooth implant placement and loading in fresh and regenerated extraction sockets. Five-year results: a case series using two different implant designs. *J Periodontol*. 2010 Apr;81(4):604-15.
290. Zembic A, Tahmaseb A, Jung RE, Wismeijer D. One-year results of maxillary overdentures supported by 2 titanium-zirconium implants - implant survival rates and radiographic outcomes. *Clin Oral Implants Res*. 2017 Jul;28(7):e60-e67.
291. Zinser MJ, Randelzhofer P, Kuiper L, Zöller JE, De Lange GL. The predictors of implant failure after maxillary sinus floor augmentation and reconstruction: a retrospective study of 1045 consecutive implants. *Oral Surg Oral Med Oral Pathol Oral Radiol*. 2013 May;115(5):571-82.
292. Zumstein T, Schütz S, Sahlin H, Sennerby L. Factors influencing marginal bone loss at a hydrophilic implant design placed with or without GBR procedures: A 5-year retrospective study. *Clin Implant Dent Relat Res*. 2019 Oct;21(5):817-826.

**c. Figure S1. Forest plot for the event 'implant failure', global results (estimate in odds ratio).**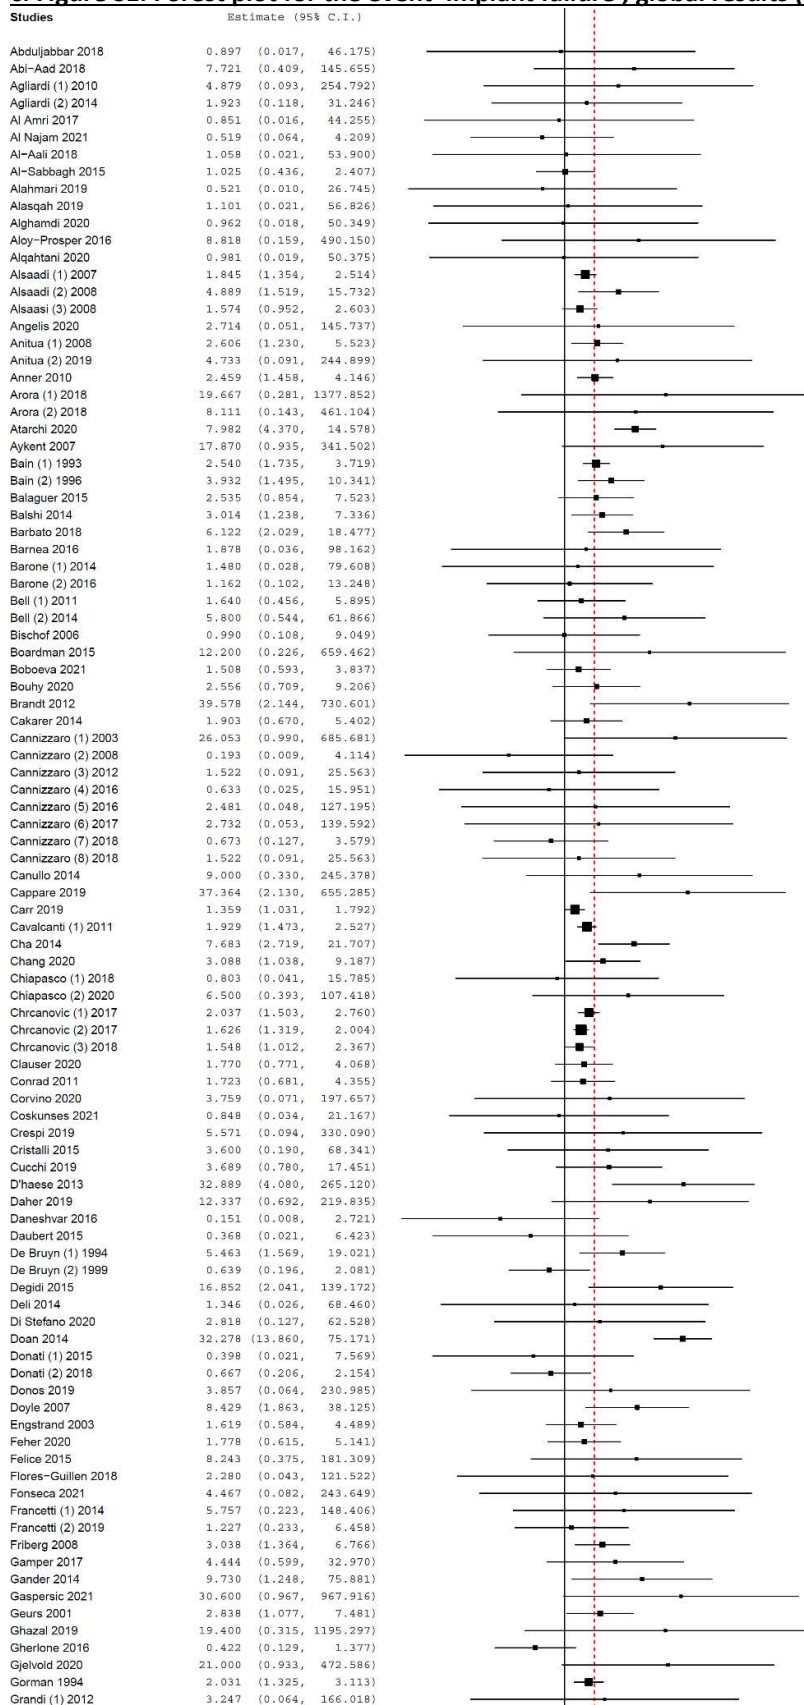

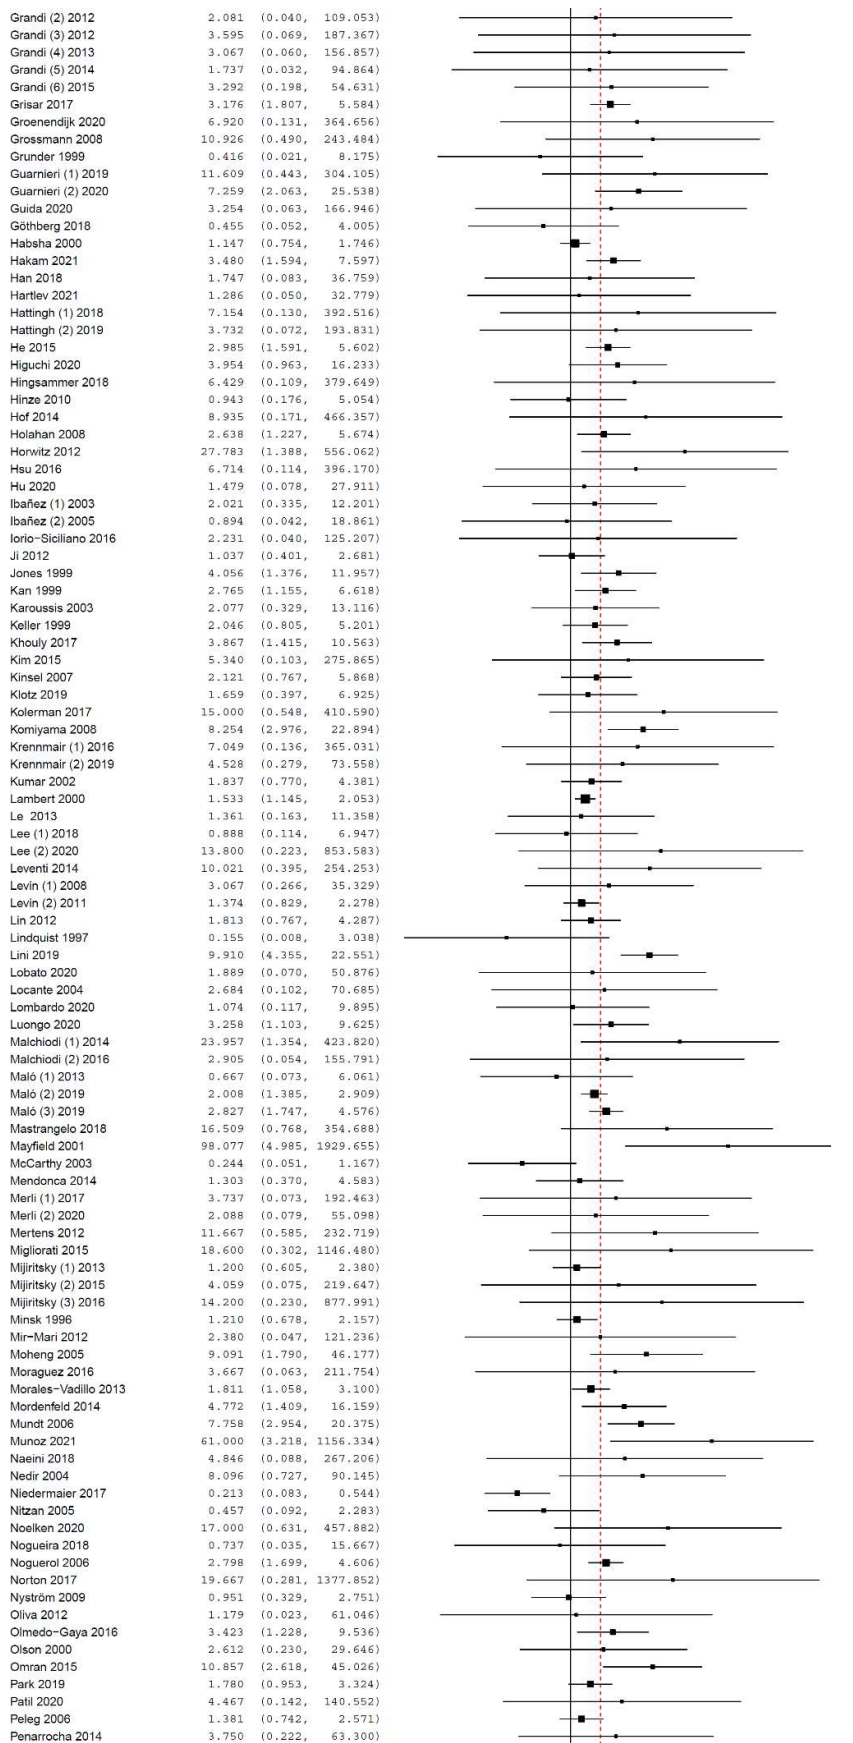

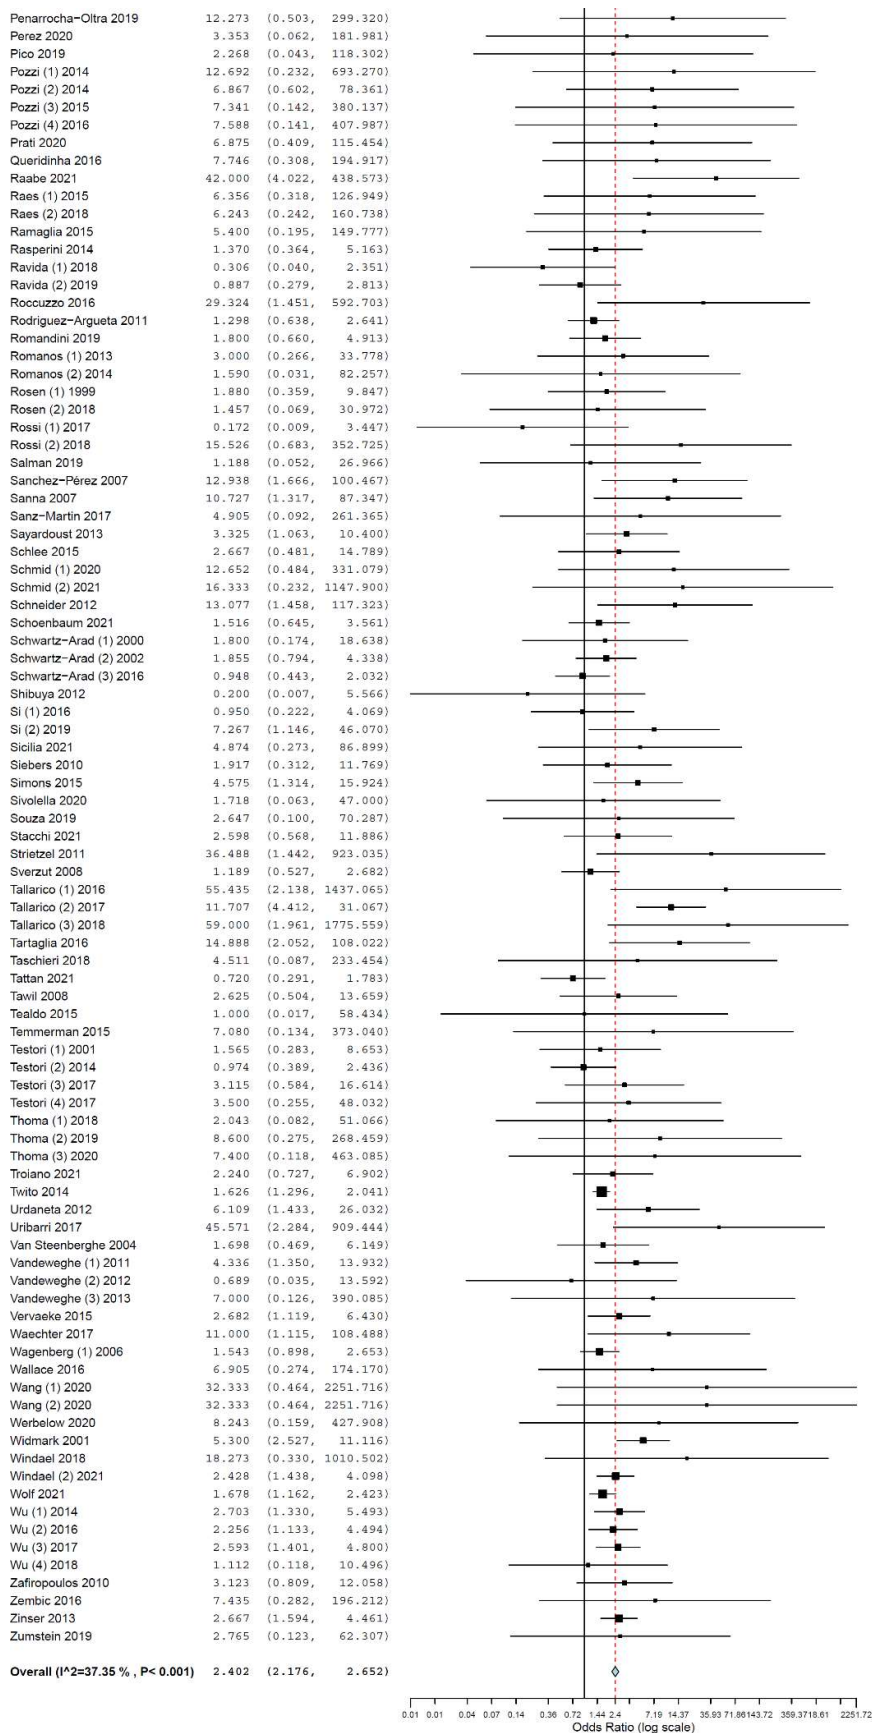

**d. Table S1. Detailed data of the included studies.**

| Study               | Year | Study design    | Country / Setting              | Patients (male/female) (n) | Patients' Age Range (mean) (years) | Prosthetic loading               | Implant location (maxilla and/or mandible) | Implant used                                                       | Type of smokers included <sup>a</sup>                                     |
|---------------------|------|-----------------|--------------------------------|----------------------------|------------------------------------|----------------------------------|--------------------------------------------|--------------------------------------------------------------------|---------------------------------------------------------------------------|
| <b>Abduljabbar</b>  | 2018 | CCT (unicenter) | Saudi Arabia / University      | 56 (56/0)                  | NM (41)                            | Delayed (3-4 mo)                 | Mx, Md                                     | Osseospeed (Astra Tech, Mölndal, Sweden)                           | 29 smokers                                                                |
| <b>Abi-Aad</b>      | 2018 | RCT (unicenter) | Lebanon / University           | 26 (12/14)                 | 34-67 (49.5)                       | Immediate, delayed (3 mo)        | Mx                                         | NobelActive (Nobel Biocare, Göteborg, Sweden)                      | 5 heavy smokers<br>9 extra-heavy smokers                                  |
| <b>Agliardi (1)</b> | 2010 | CCT (unicenter) | Italy / Private practice       | 24 (13/11)                 | 40-73 (60)                         | Immediate                        | Md                                         | MkIV TiUnite, NobelSpeedy Groovy (Nobel Biocare, Göteborg, Sweden) | 4 smokers                                                                 |
| <b>Agliardi (2)</b> | 2014 | CCT (unicenter) | Italy / Private practice       | 32 (15/17)                 | 44-68 (58)                         | Immediate                        | Mx                                         | MK IV and NobelSpeedy Groovy (Nobel Biocare, Göteborg, Sweden)     | 11 light smokers                                                          |
| <b>Al Amri</b>      | 2017 | RA (unicenter)  | Saudi Arabia / University      | 61 (51/10)                 | 33-53 (43)                         | Immediate, delayed (mean 3.2 mo) | Md                                         | Straumann Bone Level (Straumann, Basel, Switzerland)               | 33 light and heavy smokers                                                |
| <b>Al Najam</b>     | 2021 | RA (unicenter)  | Netherlands / Private Practice | 110 (62/48)                | 18-40 (24)                         | Delayed (4 mo)                   | Mx, Md                                     | Bone level (Straumann, Basel, Switzerland)                         | 19 smokers                                                                |
| <b>Al-Aali</b>      | 2018 | RA (unicenter)  | Saudi Arabia / University      | 116 (116/0)                | 35-51 (44)                         | Delayed (mean 3.2 mo)            | Mx, Md                                     | NM                                                                 | 59 smokers, but the degree of smoking among the patients was not reported |
| <b>Alahmari</b>     | 2019 | RA (unicenter)  | Saudi Arabia / University      | 123 (123/0)                | NM (43)                            | Delayed                          | Mx, Md                                     | NM                                                                 | 41 cigarette smokers (minimum of 5 cig./day),<br>40 water pipe smokers    |
| <b>Alasqah</b>      | 2019 | RA (unicenter)  | Saudi Arabia / University      | 82 (65/17)                 | NM (43)                            | NM                               | Md                                         | NM (Straumann, Basel, Switzerland)                                 | 39 smokers (minimum of 1 cig./day)                                        |
| <b>Alghamdi</b>     | 2020 | RA (unicenter)  | Saudi Arabia / University      | 51 (51/0)                  | NM (46)                            | Immediate                        | Mx, Md                                     | NM                                                                 | 26 smokers, but the degree of smoking among the patients was not reported |
| <b>Aloy-Prosper</b> | 2016 | RA (unicenter)  | Spain / University             | 53 (14/39)                 | 18-67 (35-48)                      | Delayed (3 mo)                   | Mx, Md                                     | TSA Avantblast (Phibo Dental Solutions)                            | 2 light smokers<br>3 heavy smokers                                        |
| <b>Alqahtani</b>    | 2020 | RA (unicenter)  | Saudi Arabia / University      | 101 (101/0)                | NM (51-55)                         | NM                               | Mx, Md                                     | NM                                                                 | 51 smokers                                                                |

|                    |      |                  |                              |                 |              |                             |        |                                                                               |                                           |
|--------------------|------|------------------|------------------------------|-----------------|--------------|-----------------------------|--------|-------------------------------------------------------------------------------|-------------------------------------------|
| <b>Alsaadi (1)</b> | 2007 | RA (unicenter)   | Belgium / University         | 2004 (792/1212) | NM           | NM                          | Mx, Md | Brånemark, TiUnite (Nobel Biocare, Göteborg, Sweden)                          | Light, heavy, and extra-heavy smokers     |
| <b>Alsaadi (2)</b> | 2008 | PS (unicenter)   | Belgium / University         | 283 (96/187)    | 18-86 (56.2) | NM                          | Mx, Md | TiUnite (Nobel Biocare, Göteborg, Sweden)                                     | NM                                        |
| <b>Alsaadi (3)</b> | 2008 | RA (unicenter)   | Belgium / University         | 412 (172/240)   | NM           | NM                          | Mx, Md | Brånemark, TiUnite (Nobel Biocare, Göteborg, Sweden)                          | 61 smokers                                |
| <b>Al-Sabbagh</b>  | 2015 | RA (unicenter)   | USA / University             | 415 (174/241)   | NM (59.4)    | NM                          | Mx, Md | NM                                                                            | 46 smokers                                |
| <b>Angelis</b>     | 2020 | RA (unicenter)   | Italy / Private practice     | 38 (17/21)      | 51-76 (65)   | Delayed (3 mo)              | Mx, Md | Bone Level Tapered RC, SLA, Loxim, Roxolid (Straumann, Basel, Switzerland)    | 10 light smokers                          |
| <b>Anitua (1)</b>  | 2008 | RA (multicenter) | Spain / NM                   | 1060 (386/674)  | 17-91 (54)   | Immediate, delayed (>3 mo)  | Mx, Md | BTI (Biotechnology Institute, Vitoria, Spain)                                 | 221 light, heavy, and extra-heavy smokers |
| <b>Anitua (2)</b>  | 2019 | RA (unicenter)   | Spain / Private practice     | 113 (50/63)     | 32-77 (56)   | Delayed (mean 4 mo)         | Mx, Md | UnicCa (BTI Biotechnology Institute, Vitoria-Gasteiz, Spain)                  | NM                                        |
| <b>Anner</b>       | 2010 | RA (unicenter)   | Israel / Private practice    | 475 (176/299)   | NM (52)      | NM                          | Mx, Md | NM                                                                            | 63 smokers                                |
| <b>Arora (1)</b>   | 2018 | PS (unicenter)   | Australia / Private practice | 30 (13/17)      | 26-77 (52)   | Delayed (3-4 mo)            | Mx     | NM (Straumann, Basel, Switzerland)                                            | Only light smokers (<10 cig/day)          |
| <b>Arora (2)</b>   | 2018 | RA (unicenter)   | Australia / Private practice | 40 (16/24)      | 19-74 (50.6) | Immediate, delayed (3-4 mo) | Mx     | Osseospeed (Astra Tech, Mölndal, Sweden)                                      | 3 light smokers<br>1 heavy smoker         |
| <b>Atarchi</b>     | 2020 | RA (multicenter) | USA / University             | 1343 (516/827)  | 18-96 (61.7) | NM                          | Mx     | Several (Astra EV OsseoSpeed, NobelReplace, Biomet 3i, Straumann, Zimmer)     | 58 smokers                                |
| <b>Aykent</b>      | 2007 | RA (unicenter)   | Turkey / University          | 34 (14/20)      | 19-70 (44.5) | Delayed (3-6 mo)            | Mx, Md | Calcitek (Sulzer Medical, Carlsbad, USA), SLA (Straumann, Basel, Switzerland) | NM                                        |
| <b>Bain (1)</b>    | 1993 | RA (unicenter)   | Scotland / Private practice  | 540 (229/311)   | 12-86 (55)   | NM                          | Mx, Md | Brånemark (Nobel Biocare, Göteborg, Sweden)                                   | NM                                        |
| <b>Bain (2)</b>    | 1996 | RA (unicenter)   | Scotland / Private practice  | 78 (NM)         | NM           | NM                          | Mx, Md | Brånemark (Nobel Biocare, Göteborg, Sweden)                                   | NM                                        |
| <b>Balaguer</b>    | 2015 | PS (unicenter)   | Spain / University           | 95 (43/52)      | 23-80 (55.9) | Delayed (3 mo)              | Mx, Md | Tissue Level (Straumann, Basel, Switzerland)                                  | 18 smokers                                |
| <b>Balshi</b>      | 2014 | RA (unicenter)   | USA / Private practice       | 152 (NM)        | NM           | Immediate                   | Mx, Md | Brånemark (Nobel Biocare, Göteborg, Sweden)                                   | 13 light, heavy, and extra-heavy smokers  |
| <b>Barbato</b>     | 2018 | RA (unicenter)   | Italy / Private practice     | 32 (10/22)      | 37-81 (55.4) | Delayed (6-9 mo)            | Mx     | TSA Advance (Defcon, Barcelona, Spain)                                        | 13 heavy and extra-heavy smokers          |

|                       |      |                 |                                |                |                    |                           |        |                                                                                                                                                                                                                 |                                            |
|-----------------------|------|-----------------|--------------------------------|----------------|--------------------|---------------------------|--------|-----------------------------------------------------------------------------------------------------------------------------------------------------------------------------------------------------------------|--------------------------------------------|
| <b>Barnea</b>         | 2016 | RA (unicenter)  | Israel / Private practice      | 29 (16/13)     | 40-83 (64.5)       | Delayed (6 mo)            | Mx     | Biocom (MIS Implant technologies, Bar Lev Industrial Park, Israel)                                                                                                                                              | 10 smokers                                 |
| <b>Barone (1)</b>     | 2014 | PS (unicenter)  | Italy / Hospital               | 30 (16/14)     | 29-67 (43-51)      | Immediate, delayed (4 mo) | Mx, Md | Blossom (Intra-Lock International, Boca Raton, USA)                                                                                                                                                             | 12 light smokers                           |
| <b>Barone (2)</b>     | 2016 | RCT (unicenter) | Italy / University             | 116 (39/77)    | NM (51.4)          | Delayed (3 mo)            | Mx, Md | CT, Blossom (Intra-Lock International, Boca Raton, USA)                                                                                                                                                         | 35 light smokers                           |
| <b>Bell (1)</b>       | 2011 | RA (unicenter)  | USA / Private practice         | 655 (NM)       | NM                 | 3 months                  | Mx, Md | SLA (Straumann, Waldenburg, Switzerland)                                                                                                                                                                        | NM                                         |
| <b>Bell (2)</b>       | 2014 | RA (unicenter)  | USA / Private practice         | 39 (NM)        | 24-88 (58)         | Immediate, delayed        | Mx     | Oxidized (NobelActive, Nobel Biocare, Göteborg, Sweden)                                                                                                                                                         | NM                                         |
| <b>Bischof</b>        | 2006 | RA (unicenter)  | Switzerland / Private practice | 212 (91/121)   | 22-88 (49.9)       | Delayed (mean 3.7 mo)     | Mx, Md | SLA, ITI (Straumann, Waldenburg, Switzerland)                                                                                                                                                                   | Light and heavy smokers                    |
| <b>Boardman</b>       | 2015 | RA (unicenter)  | Australia / Private practice   | 98 (21/77)     | 23-81 (51.2)       | NM                        | Mx     | Several (AstraTech, Straumann, Biomet 3i, Nobel Biocare)                                                                                                                                                        | 7 smokers                                  |
| <b>Boboeva</b>        | 2021 | RA (unicenter)  | South Korea / University       | 1295 (584/711) | 15-86 (46.7, 71.4) | Delayed                   | Mx, Md | Several (Astra Tech, AB, Mölndal, Sweden; Dentis, Daegu, South Korea; Dentium, Seoul, South Korea; Straumann, Basel, Switzerland; Megagen Implant, Gyeongsan, South Korea; Osstem Implant, Seoul, South Korea). | 78 smokers                                 |
| <b>Bouhy</b>          | 2020 | PS (unicenter)  | Belgium / University           | 30 (17/13)     | 48-82 (66.4)       | Delayed (3 mo)            | Mx     | Roxolid (Straumann, Basel, Switzerland)                                                                                                                                                                         | 4 light smokers (<10 cig/day)              |
| <b>Brandt</b>         | 2012 | PS (unicenter)  | USA / University               | 34 (NM)        | 35-70 (NM)         | Immediate                 | Md     | MDL (Intra-Lock System International, Boca Raton, Florida)                                                                                                                                                      | NM                                         |
| <b>Cakarar</b>        | 2014 | RA (unicenter)  | Turkey / University            | 274 (109/165)  | 19-84 (50.2)       | Delayed (2-3 mo)          | Mx, Md | Several (Astra Tech, Straumann, SwissPlus)                                                                                                                                                                      | Yes, but the exact number was not informed |
| <b>Cannizzaro (1)</b> | 2003 | CCT (unicenter) | Italy / Private practice       | 28 (14/14)     | 18-72 (38)         | Immediate, delayed        | Mx, Md | Spline Twist MTX (Centerpulse Dental, Carlsbad, USA)                                                                                                                                                            | 6 smokers                                  |
| <b>Cannizzaro (2)</b> | 2008 | RCT (unicenter) | Italy / Private practice       | 60 (25/35)     | 36-80 (61)         | Immediate, early (6 wk)   | Md     | Tapered SwissPlus (Zimmer Dental, Carlsbad, USA)                                                                                                                                                                | 9 light smokers<br>21 heavy smokers        |
| <b>Cannizzaro (3)</b> | 2012 | RCT (unicenter) | Italy / Private practice       | 30 (15/15)     | 18-57 (35)         | Immediate, delayed (6 wk) | Mx, Md | NanoTite (Biomet 3i, Palm Beach, USA)                                                                                                                                                                           | 12 light and heavy smokers                 |
| <b>Cannizzaro (4)</b> | 2016 | RCT (unicenter) | Italy / Private practice       | 50 (25/25)     | 19-62 (40)         | Immediate                 | Mx, Md | Syra and Syra SL (Sweden & Martina, Due Carrare, Italy)                                                                                                                                                         | 11 light smokers<br>6 heavy smokers        |
| <b>Cannizzaro (5)</b> | 2016 | RCT (unicenter) | Italy / Private practice       | 40 (21/19)     | 33-78 (56)         | Immediate                 | Mx, Md | Prama PF tapered (Sweden & Martina, Due Carrare, Italy)                                                                                                                                                         | Light and heavy smokers                    |



|                       |      |                   |                               |                 |               |                           |        |                                                                                                                       |                                                               |
|-----------------------|------|-------------------|-------------------------------|-----------------|---------------|---------------------------|--------|-----------------------------------------------------------------------------------------------------------------------|---------------------------------------------------------------|
| <b>Cannizzaro (6)</b> | 2017 | RCT (multicenter) | Italy / Private practice      | 60 (29/31)      | 37-83 (59)    | Immediate                 | Md     | NT Full Osseotite (Zimmer Biomet, Palm Beach Gardens, USA), ExFeel (MegaGen Implant, Gyeongbuk, South Korea)          | 11 light smokers<br>5 heavy smokers                           |
| <b>Cannizzaro (7)</b> | 2018 | RCT (multicenter) | Italy / Private practice      | 48 (28/20)      | 36-78 (58)    | Immediate                 | Mx, Md | Syra and Syra SL (Sweden & Martina, Due Carrare, Italy)                                                               | 13 light smokers<br>4 heavy smokers                           |
| <b>Cannizzaro (8)</b> | 2018 | RCT (unicenter)   | Italy / Private practice      | 30 (15/15)      | 18-57 (35)    | Immediate, delayed (6 wk) | Mx, Md | NanoTite (Biomet 3i, Palm Beach Gardens, USA)                                                                         | 9 light smokers<br>3 heavy smokers                            |
| <b>Canullo</b>        | 2014 | RCT (unicenter)   | Spain / University            | 15 (6/9)        | 32-76 (57.3)  | Delayed (2 mo)            | Md     | Premium SP (Sweden & Martina, Padua, Italy)                                                                           | 4 light smokers                                               |
| <b>Cappare</b>        | 2019 | PS (unicenter)    | Italy / University            | 24 (NM)         | NM            | Immediate                 | Mx, Md | TTx, Winsix (Biosafin, Ancona, Italy)                                                                                 | 12 smokers                                                    |
| <b>Carr</b>           | 2019 | RA (unicenter)    | USA / Non-profit organization | 2798 (NM)       | >18           | Immediate, delayed        | Mx, Md | NM                                                                                                                    | NM                                                            |
| <b>Cavalcanti</b>     | 2011 | RA (multicenter)  | Italy / Private practice      | 1727 (702/1025) | 17-85 (47-51) | Immediate, delayed        | Mx, Md | Several (3i Biomet, Astra Tech, Camlog, Friadent-Dentsply, Nobel Biocare, Straumann, Sweden & Martina, Zimmer Dental) | 549 smokers                                                   |
| <b>Cha</b>            | 2014 | PS (unicenter)    | South Korea / Hospital        | 161 (96/65)     | NM            | Delayed (6 mo)            | Mx     | Implantium (Dentium Co., Seoul, Korea)                                                                                | 18 heavy and extra-heavy smokers                              |
| <b>Chang</b>          | 2020 | RA (unicenter)    | China / Hospital              | 376 (222/154)   | NM (49)       | Delayed                   | Mx, Md | Osseotite, Certain Taper (Biomet 3i, Palm Beach Gardens, USA)                                                         | 15 smokers<br>52 former smokers                               |
| <b>Chiapasco (1)</b>  | 2018 | RA (NM)           | Italy / NM                    | 69 (16/53)      | 16-72 (48)    | Delayed (3-9 mo)          | Mx, Md | NM                                                                                                                    | 10 light smokers                                              |
| <b>Chiapasco (2)</b>  | 2020 | RA (NM)           | Italy / NM                    | 75 (21/54)      | 18-78 (49)    | Delayed (3-10 mo)         | Md     | NM                                                                                                                    | 10 light smokers                                              |
| <b>Chrcanovic (1)</b> | 2017 | RA (unicenter)    | Sweden / Public service       | 999 (479/520)   | 14-90 (60)    | Immediate, delayed        | Mx, Md | Several                                                                                                               | 263 light, heavy and extra-heavy smokers<br>23 former smokers |
| <b>Chrcanovic (2)</b> | 2017 | RA (unicenter)    | Sweden / Public service       | 1406 (625/781)  | NM            | Immediate, delayed        | Mx, Md | Several                                                                                                               | 285 light, heavy and extra-heavy smokers<br>33 former smokers |
| <b>Chrcanovic (3)</b> | 2018 | RA (unicenter)    | Sweden / Public service       | 227 (95/132)    | NM            | Immediate, delayed        | Mx, Md | Several                                                                                                               | Light, heavy and extra-heavy smokers                          |
| <b>Clauser</b>        | 2020 | PS (multicenter)  | Italy / Private practice      | 214 (92/122)    | 17-84 (48.3)  | Immediate                 | Mx, Md | NanoTite Certain Tapered (Biomet 3i)                                                                                  | 24 heavy smokers<br>4 extra-heavy smokers                     |

|                   |      |                  |                            |               |              |                                  |        |                                                                                             |                                                                          |
|-------------------|------|------------------|----------------------------|---------------|--------------|----------------------------------|--------|---------------------------------------------------------------------------------------------|--------------------------------------------------------------------------|
| <b>Conrad</b>     | 2011 | RA (unicenter)   | USA / University           | NM            | 18-84 (55.3) | Immediate, delayed (mean 3.8 mo) | Mx     | NM                                                                                          | NM                                                                       |
| <b>Corvino</b>    | 2020 | RCT (unicenter)  | Italy / Private practice   | 33 (17/16)    | NM (67.4)    | Delayed (2-3 mo)                 | Mx, Md | NeO Conical Standard, NeO Internal Hex (Alpha-Bio Tec, Petah Tikva, Israel)                 | 5 light smokers                                                          |
| <b>Coskunes</b>   | 2021 | PS (unicenter)   | Turkey / University        | 28 (17/11)    | 23-72 (52)   | Immediate                        | Mx, Md | Roxolid Bone Level Tapered (Straumann, Basel, Switzerland)                                  | 6 smokers                                                                |
| <b>Crespi</b>     | 2019 | RA (NM)          | Italy / NM                 | 22 (8/14)     | NM (54)      | Immediate, delayed (4 mo)        | Mx     | out-Link PRO-Link (Sweden & Martina)                                                        | 3 smokers                                                                |
| <b>Cristalli</b>  | 2015 | PS (NM)          | Italy / NM                 | 24 (9/15)     | 35-65 (47.3) | Immediate                        | Mx, Md | NobelActive (Nobel Biocare, Göteborg, Sweden)                                               | 6 light smokers                                                          |
| <b>Cucchi</b>     | 2019 | PS (NM)          | Italy / NM                 | 20 (NM)       | NM (67)      | Early (3-5 d)                    | Mx, Md | NM                                                                                          | Light smokers                                                            |
| <b>D'haese</b>    | 2013 | PS (unicenter)   | Belgium / University       | 26 (16/10)    | 20-81 (51.8) | Immediate                        | Mx     | Osseospeed (Astra Tech, Mölndal, Sweden)                                                    | 9 heavy smokers                                                          |
| <b>Daher</b>      | 2019 | RCT (unicenter)  | Lebanon / University       | 24 (11/13)    | 34-67 (49.2) | Immediate, delayed               | Mx     | NobelActive (Nobel Biocare, Göteborg, Sweden)                                               | 13 heavy smokers                                                         |
| <b>Daneshvar</b>  | 2016 | RA (unicenter)   | Canada / University        | 111 (40/71)   | 17-86 (56.1) | NM                               | Mx, Md | NM                                                                                          | 8 smokers                                                                |
| <b>Daubert</b>    | 2015 | RA (unicenter)   | USA / University           | 96 (48/48)    | 31-86 (67.6) | Immediate, delayed               | Mx, Md | Several                                                                                     | 7 smokers, but the degree of smoking among the patients was not reported |
| <b>De Bruyn</b>   | 1994 | RA (unicenter)   | Belgium / Private practice | 117 (NM)      | 20-80 (NM)   | NM                               | Mx, Md | Brånemark (Nobel Biocare, Göteborg, Sweden)                                                 | 26 smokers                                                               |
| <b>De Bruyn</b>   | 1999 | PS (unicenter)   | Sweden / University        | 23 (NM)       | NM           | NM                               | Mx     | Screw-Vent (Zimmer Dental, Carlsbad, USA)                                                   | 10 smokers                                                               |
| <b>Degidi</b>     | 2015 | PS (unicenter)   | Italy / Private practice   | 114 (NM)      | NM (53.1)    | Immediate                        | Mx, Md | XiVE (Dentsply, Mannheim, Germany)                                                          | 34 smokers                                                               |
| <b>Deli</b>       | 2014 | RA (unicenter)   | Italy / University         | 216 (94/122)  | NM (54)      | Delayed (4 mo)                   | Mx, Md | Straight line (Dentegris, Duisburg, Germany)                                                | 92 light smokers                                                         |
| <b>Di Stefano</b> | 2020 | RA (multicenter) | Italy / Private practice   | 32 (12/20)    | 36-73 (52.2) | Delayed (3-4 mo)                 | Mx, Md | XiVE (Dentsply)                                                                             | 9 light smokers                                                          |
| <b>Doan</b>       | 2014 | RA (multicenter) | Australia / University     | 472 (216/256) | 19-89 (54)   | Delayed                          | Mx, Md | Several (Imtec, Innova, MIS, Southern, Straumann, Biomet/3i, Zimmer Dental Implant Systems) | 39 smokers                                                               |
| <b>Donati (1)</b> | 2015 | PS (multicenter) | Italy / Private practice   | 151 (70/81)   | NM (45)      | Immediate, delayed (3 mo)        | Mx, Md | Osseospeed (Astra Tech, Mölndal, Sweden)                                                    | 34 smokers                                                               |
| <b>Donati (2)</b> | 2018 | RCT (unicenter)  | Sweden / Public service    | 51 (20/31)    | 36-80 (59.5) | Delayed                          | Mx, Md | Turned and TiOblast (Astra Tech, Mölndal, Sweden)                                           | 17 smokers, but the degree of smoking among                              |

|                       |      |                   |                                            |                |                          |                                       |        |                                                                                                                                                    |                                                          |
|-----------------------|------|-------------------|--------------------------------------------|----------------|--------------------------|---------------------------------------|--------|----------------------------------------------------------------------------------------------------------------------------------------------------|----------------------------------------------------------|
|                       |      |                   |                                            |                |                          |                                       |        |                                                                                                                                                    | the patients was not reported                            |
| <b>Donos</b>          | 2019 | RCT (unicenter)   | England / University                       | 16 (5/11)      | NM (49)                  | Immediate, delayed (4 mo)             | Mx     | Straumann Bone Level SLActive (Straumann, Basel, Switzerland)                                                                                      | 3 light smokers                                          |
| <b>Doyle</b>          | 2007 | RA (unicenter)    | USA / Private practice                     | 171 (NM)       | NM (47.5)                | NM                                    | Mx, Md | NM                                                                                                                                                 | 10 smokers                                               |
| <b>Engstrand</b>      | 2003 | PS (unicenter)    | Sweden / Public Service                    | 95 (53/42)     | 45-89 (68.5)             | Immediate, delayed                    | Md     | Turned (Brånemark, Nobel Biocare, Göteborg, Sweden)                                                                                                | 23 smokers                                               |
| <b>Feher</b>          | 2020 | RA (unicenter)    | Austria / University                       | 1132 (505/627) | NM (50.6)                | Evaluation of implants before loading | Mx, Md | NM                                                                                                                                                 | 157 light smokers<br>60 heavy smokers                    |
| <b>Felice</b>         | 2015 | RCT (multicenter) | Italy / Private practice                   | 50 (25/25)     | 32-72 (52)               | Immediate, delayed (4 mo)             | Mx     | XiVE S plus (Dentsply Friadent, Mannheim, Germany)                                                                                                 | Light and heavy smokers                                  |
| <b>Flores-Guillen</b> | 2018 | RCT (unicenter)   | Spain / University                         | 40 (23/17)     | NM (48)                  | Delayed (2-3 mo)                      | Mx, Md | Straumann Bone Level SLActive (Straumann, Basel, Switzerland)                                                                                      | 12 light smokers                                         |
| <b>Fonseca</b>        | 2021 | PS (unicenter)    | Switzerland / University                   | 32 (20/12)     | 28-82 (52.4)             | Early, delayed (2-4 mo)               | Mx, Md | SLActive (Straumann, Basel, Switzerland)                                                                                                           | 5 smokers<br>3 former smokers                            |
| <b>Francetti (1)</b>  | 2014 | PS (unicenter)    | Italy / Private practice                   | 22 (10/22)     | NM                       | Delayed (3-6 mo)                      | Mx, Md | Replace Select Straight and Tapered TiUnite (Nobel Biocare, Göteborg, Sweden)                                                                      | 6 light and heavy smokers                                |
| <b>Francetti (2)</b>  | 2019 | RA (unicenter)    | Italy / Private practice                   | 77 (32/45)     | NM (68.2)                | Immediate, early                      | Mx, Md | Nobel Speedy Groovy, MK IV TiUnite (Nobel Biocare, Göteborg, Sweden)                                                                               | 19 light and heavy smokers                               |
| <b>Friberg</b>        | 2008 | RA (unicenter)    | Sweden / Public Service                    | 75 (39/36)     | 20-87 (64)               | NM                                    | Mx     | Turned (Brånemark, Nobel Biocare, Göteborg, Sweden)                                                                                                | 28 smokers                                               |
| <b>Gamper</b>         | 2017 | RCT (unicenter)   | Switzerland / University                   | 60 (23/37)     | NM (47.8-55.7, 2 groups) | Early, delayed (from 6 wk to 7 mo)    | Mx, Md | Mk III and Mk IV TiUnite (Nobel Biocare, Göteborg, Sweden), SLA Standard, Standard Plus, and Standard Plus Tapered (Straumann, Basel, Switzerland) | 14 smokers, 2 smoked <5 cig/day and 12 smoked >5 cig/day |
| <b>Gander</b>         | 2014 | RA (multicenter)  | Switzerland / Private practice, University | 33 (23/10)     | NM (64)                  | NM                                    | Md     | OsseoSpeed (Astra Tech, Mölndal, Sweden)                                                                                                           | 21 smokers                                               |
| <b>Gaspersic</b>      | 2021 | PS (unicenter)    | Slovenia / NM                              | 11 (5/6)       | 49-73 (61)               | Delayed (6 mo)                        | Mx     | SLActive (Straumann, Basel, Switzerland)                                                                                                           | 3 smokers                                                |
| <b>Geurs</b>          | 2001 | RA (multicenter)  | USA / Private practice                     | 100 (NM)       | NM                       | NM                                    | Mx     | NM                                                                                                                                                 | NM                                                       |
| <b>Ghazal</b>         | 2019 | RCT (multicenter) | USA / University                           | 50 (18/32)     | NM (51.2)                | Early (3-4 wk)                        | Mx, Md | Roxolid (Straumann, Basel, Switzerland)                                                                                                            | 2 light smokers<br>6 former smokers                      |
| <b>Gherlone (2)</b>   | 2016 | PS (unicenter)    | Italy / Hospital                           | 68 (22/46)     | 40-73 (55.3)             | Delayed (2-3 mo)                      | Mx, Md | WinSix (BioSAFin., Ancona, Italy)                                                                                                                  | 29 light smokers<br>13 heavy smokers                     |

|                      |      |                   |                                             |               |               |                                  |        |                                                                            |                                                                          |
|----------------------|------|-------------------|---------------------------------------------|---------------|---------------|----------------------------------|--------|----------------------------------------------------------------------------|--------------------------------------------------------------------------|
| <b>Gjelvold</b>      | 2020 | PS (unicenter)    | Sweden / Public service                     | 46 (25/21)    | NM (40)       | Immediate                        | Mx     | Tapered Internal (BioHorizons, Birmingham, USA)                            | 3 smokers, but the degree of smoking among the patients was not reported |
| <b>Gorman</b>        | 1994 | CCT (multicenter) | USA / Military clinic                       | 310 (NM)      | NM            | NM                               | Mx, Md | NM                                                                         | 82 smokers                                                               |
| <b>Göthberg</b>      | 2018 | RCT (unicenter)   | Sweden / Public service                     | 50 (18/32)    | NM (67)       | Immediate, delayed (3 mo)        | Mx, Md | Brånemark TiUnite (Nobel Biocare, Göteborg, Sweden)                        | 15 light smokers                                                         |
| <b>Grandi (1)</b>    | 2012 | CCT (multicenter) | Italy / Private practice                    | 47 (22/25)    | 52-78 (62.3)  | Immediate                        | Md     | JDEvolution (JDentalCare, Modena, Italy)                                   | 11 light and heavy smokers                                               |
| <b>Grandi (2)</b>    | 2012 | RCT (multicenter) | Italy / Private practice                    | 28 (11/17)    | 39-64 (51)    | Immediate                        | Mx, Md | JDEvolution (JDentalCare, Modena, Italy)                                   | 9 light smokers                                                          |
| <b>Grandi (3)</b>    | 2012 | PS (multicenter)  | Italy / Private practice                    | 42 (13/29)    | 71-89 (76.5)  | Immediate                        | Md     | JDEvolution (JDentalCare, Modena, Italy)                                   | 9 light smokers                                                          |
| <b>Grandi (4)</b>    | 2013 | RCT (multicenter) | Italy / Private practice                    | 80 (31/49)    | 39-65 (52-55) | Immediate, delayed (2 mo)        | Mx, Md | JDEvolution (JDentalCare, Modena, Italy)                                   | 22 light smokers                                                         |
| <b>Grandi (5)</b>    | 2014 | RCT (multicenter) | Italy / Private practice                    | 25 (9/16)     | 39-74 (56)    | Immediate                        | Mx, Md | JDEvolution (JDentalCare, Modena, Italy)                                   | 9 light and heavy smokers                                                |
| <b>Grandi (6)</b>    | 2015 | RCT (multicenter) | Italy / Private practice                    | 105 (50/55)   | 21-75 (45-51) | Immediate, early, delayed (4 mo) | Mx, Md | JD Evolution (J DentalCare, Modena, Italy)                                 | 19 light smokers<br>6 heavy smokers                                      |
| <b>Grisar</b>        | 2017 | RA (unicenter)    | Belgium / University                        | 509 (240/269) | 16-87 (58)    | Immediate, delayed               | Mx, Md | Several (Nobel Biocare, Straumann, Bicon, Astra, Ankylos)                  | Yes, but exact number not reported                                       |
| <b>Groenendijk</b>   | 2020 | PS (multicenter)  | Netherlands / Private practice + University | 98 (41/57)    | 17-80 (45.8)  | Immediate                        | Mx     | NobelActive (Nobel Biocare, Göteborg, Sweden)                              | 12 smokers                                                               |
| <b>Grossman</b>      | 2008 | RA (unicenter)    | Israel / Private practice                   | 23 (20/3)     | 33-57 (44.2)  | NM                               | Mx, Md | Several (Zimmer Dental, 3i Implant Innovations, MIS Implants Technologies) | 8 smokers                                                                |
| <b>Grunder</b>       | 1999 | PS (multicenter)  | Switzerland / Private practice              | 74 (40/34)    | NM (57.8)     | Delayed (3-6 mo)                 | Mx, Md | Osseotite (3i-Implant Innovations Inc., Palm Beach Gardens, USA)           | 19 smokers                                                               |
| <b>Guarnieri (1)</b> | 2019 | RCT (unicenter)   | Italy / University                          | 20 (12/8)     | 36-64 (49.7)  | Delayed (4-6 mo)                 | Mx, Md | Laser Lok (BioHorizons, Birmingham, USA)                                   | Light smokers                                                            |
| <b>Guarnieri (2)</b> | 2020 | RA (multicenter)  | Italy / Private practice                    | 274 (146/128) | 45-75 (48.1)  | Immediate, delayed               | Mx, Md | BioHorizons TLX and TRX (BioHorizons)                                      | 124 smokers                                                              |
| <b>Guida</b>         | 2020 | RCT (multicenter) | Italy / Private practice + University       | 30 (17/13)    | NM (63)       | Delayed (3 mo)                   | Md     | OsseoSpeed TX (Dentsply, Mölndal, Sweden)                                  | 7 heavy smokers<br>4 former smokers                                      |

|                     |      |                  |                                                                     |                |              |                                |        |                                                                                |                                                 |
|---------------------|------|------------------|---------------------------------------------------------------------|----------------|--------------|--------------------------------|--------|--------------------------------------------------------------------------------|-------------------------------------------------|
| <b>Habsha</b>       | 2000 | RA (unicenter)   | Canada / University                                                 | 389 (NM)       | 15-84 (49.3) | NM                             | Mx, Md | Brånemark (Nobel Biocare, Göteborg, Sweden)                                    | 104 smokers                                     |
| <b>Hakam</b>        | 2021 | RA (unicenter)   | USA / University                                                    | 771 (346/425)  | 22-97 (67.3) | NM                             | Mx, Md | NM                                                                             | 37 smokers                                      |
| <b>Han</b>          | 2018 | PS (multicenter) | China / University                                                  | 45 (17/28)     | 26-73 (53)   | Early (6 wk)                   | Mx, Md | OsseoSpeed TX (Dentsply, Mölndal, Sweden)                                      | 2 smokers<br>3 former smokers                   |
| <b>Hartlev</b>      | 2021 | RCT (unicenter)  | Denmark / University                                                | 27 (15/12)     | 23-72 (50)   | Delayed (mean 6.7 mo)          | Mx     | NobelParallel Conical Connection (Nobel Biocare, Göteborg, Sweden)             | 3 smokers                                       |
| <b>Hattingh (1)</b> | 2018 | PS (unicenter)   | England / Private practice                                          | 51 (36/15)     | 38-89 (61)   | Delayed (4 mo)                 | Mx, Md | MAX (Southern Implants, Irene, South Africa)                                   | 5 smokers                                       |
| <b>Hattingh (2)</b> | 2019 | RA (unicenter)   | United Kingdom / Private practice                                   | 85 (43/42)     | 45-87 (65)   | Delayed (4 mo)                 | Mx, Md | MAX (Southern Implants, Irene, South Africa)                                   | NM                                              |
| <b>He</b>           | 2015 | RA (unicenter)   | China / University                                                  | 1377 (704/673) | 18-83 (44.9) | Immediate, delayed             | Mx, Md | Several (Straumann, Bego, Dentium, Anthogyr, Biomet 3i, Lifecore, Osstem, BLB) | NM                                              |
| <b>Higuchi</b>      | 2020 | PS (multicenter) | USA, Chile, Spain, Australia, Italy / University + Private practice | 110 (50/60)    | NM (61.7)    | Immediate, early (within 10 d) | Md     | Nobel Active (Nobel Biocare, Göteborg, Sweden)                                 | 23 light and heavy smokers<br>47 former smokers |
| <b>Hingsammer</b>   | 2018 | RA (unicenter)   | Austria / Private practice                                          | 25 (9/16)      | 19-73 (42.5) | Immediate                      | Mx     | NM (Nobel Biocare, Göteborg, Sweden)                                           | 3 smokers                                       |
| <b>Hinze</b>        | 2010 | CCT (unicenter)  | Germany / Private practice                                          | 37 (18/19)     | 39-84 (64.6) | Immediate                      | Mx, Md | Osseotite, NanoTite Tapered (Biomet 3i, Palm Beach Gardens, USA)               | 11 light and heavy smokers                      |
| <b>Hof</b>          | 2014 | RA (unicenter)   | Austria / University                                                | 153 (73/80)    | NM (37)      | Delayed                        | Mx     | MkIII, Nobel Replace Tapered (Nobel Biocare, Göteborg, Sweden)                 | 15 smokers                                      |
| <b>Holahan</b>      | 2008 | RA (unicenter)   | USA / University                                                    | 192 (0/192)    | 50-85 (63.4) | NM                             | Mx, Md | NM                                                                             | 24 smokers                                      |
| <b>Horwitz</b>      | 2012 | PS (unicenter)   | Israel / University                                                 | 18 (NM)        | 34-69 (54.5) | Immediate                      | Mx, Md | Seven (MIS Implants Technologies Ltd., Tel Aviv, Israel)                       | 5 smokers                                       |
| <b>Hsu</b>          | 2016 | RCT (unicenter)  | USA / University                                                    | 26 (19/7)      | 31-90 (57.7) | Early                          | Mx     | NM (SuperLine, Dentium), Zimmer TSV (Zimmer Dental)                            | 3 smokers<br>10 former smokers                  |

|                        |      |                  |                                          |               |               |                    |        |                                                                                                                                                                                                |                                            |
|------------------------|------|------------------|------------------------------------------|---------------|---------------|--------------------|--------|------------------------------------------------------------------------------------------------------------------------------------------------------------------------------------------------|--------------------------------------------|
| <b>Hu</b>              | 2020 | RA (unicenter)   | Singapore / Public Service               | 200 (100/100) | 28-84 (57.7)  | NM                 | Mx, Md | NM (Straumann, Basel, Switzerland)                                                                                                                                                             | Light smokers                              |
| <b>Ibañez (1)</b>      | 2003 | CCT (NM)         | Argentina / Private practice             | 195 (86/109)  | 18-79 (49.2)  | Immediate, delayed | Mx, Md | Osseotite (3i-Implant Innovations Inc., Palm Beach Gardens, USA)                                                                                                                               | Heavy smokers                              |
| <b>Ibañez (2)</b>      | 2005 | PS (multicenter) | Argentina / Private practice, University | 41 (11/30)    | 38-82 (62.1)  | Immediate          | Mx, Md | Osseotite (Biomet 3i, Palm Beach Gardens, USA)                                                                                                                                                 | NM                                         |
| <b>Iorio-Siciliano</b> | 2016 | RA (unicenter)   | Italy / University                       | 20 (7/13)     | NM (46.5)     | Delayed (3-6 mo)   | Mx, Md | Laser-Lok Tapered Internal Plus (BioHorizons)                                                                                                                                                  | 6 light smokers                            |
| <b>Ji</b>              | 2012 | RA (unicenter)   | USA / University                         | 45 (18/27)    | 25-88 (61.5)  | Immediate          | Mx, Md | XiVe (Dentsply Friadent, Mannheim, Germany), TiUnite (Nobel Biocare, Göteborg, Sweden), Steri-Oss Hex-Loc (Nobel Biocare, Göteborg, Sweden) Tapered Screw-Vent, (Zimmer Dental, Carlsbad, USA) | 8 smokers                                  |
| <b>Jones</b>           | 1999 | RCT (unicenter)  | USA / University                         | 65 (25/40)    | 21-70 (50)    | Delayed (3-7 mo)   | Mx, Md | TPS (Sterngold/Implamed, Attleboro, USA)                                                                                                                                                       | 19 smokers                                 |
| <b>Kan</b>             | 1999 | RA (unicenter)   | USA / University                         | 60 (27/33)    | 41-84 (64.6)  | NM                 | Mx     | NM                                                                                                                                                                                             | 16 smokers                                 |
| <b>Karoussis</b>       | 2003 | CCT (unicenter)  | Switzerland / University                 | 53 (NM)       | NM            | Delayed (4-6 mo)   | Mx, Md | TPS (ITI Straumann, Waldenburg, Switzerland)                                                                                                                                                   | 12 smokers                                 |
| <b>Keller</b>          | 1999 | RA (unicenter)   | USA / Non-profit organization            | 62 (42/20)    | 15-73 (28-59) | NM                 | Mx     | Brånemark (Nobel Biocare, Göteborg, Sweden)                                                                                                                                                    | 8 smokers                                  |
| <b>Khouly</b>          | 2017 | RA (unicenter)   | Spain / Private practice                 | 67 (30/37)    | NM (56)       | Delayed (6-9 mo)   | Mx     | BTI Externa (BTI, Biotechnology Institute, Vitoria-Gasteiz, Spain) and Brånemark Mk IV TiUnite (Nobel Biocare, Göteborg, Sweden)                                                               | NM                                         |
| <b>Kim</b>             | 2015 | RA (unicenter)   | USA / Community practice                 | 85 (43/42)    | 17-83 (55)    | Immediate, delayed | Mx, Md | Nobel Replace Select (Nobel Biocare, Göteborg, Sweden)                                                                                                                                         | NM                                         |
| <b>Kinsel</b>          | 2007 | RA (unicenter)   | USA / Private practice                   | 43 (12/31)    | 35-80 (58)    | Immediate          | Mx, Md | TPS, SLA (Straumann, Basel, Switzerland)                                                                                                                                                       | 12 extra-heavy smokers                     |
| <b>Klotz</b>           | 2019 | RA (unicenter)   | Germany / Private practice               | 84 (28/56)    | 28-96 (60.2)  | Delayed            | Mx, Md | BlueSky (Bredent Medical)                                                                                                                                                                      | Yes, but the exact number was not reported |

|                      |      |                   |                            |               |              |                    |        |                                                                                                                                                                                                        |                                            |
|----------------------|------|-------------------|----------------------------|---------------|--------------|--------------------|--------|--------------------------------------------------------------------------------------------------------------------------------------------------------------------------------------------------------|--------------------------------------------|
| <b>Kolerman</b>      | 2017 | RA (unicenter)    | Israel / University        | 39 (16/23)    | 24-82 (47.5) | Immediate          | Mx     | Lans (MIS, Bar Lev, Israel)                                                                                                                                                                            | 7 light smokers                            |
| <b>Komiyama</b>      | 2008 | RA (unicenter)    | Sweden / University        | 29 (20/9)     | 42-90 (71.5) | Immediate          | Mx, Md | TiUnite Brånemark MkIII (Nobel Biocare, Göteborg, Sweden)                                                                                                                                              | 5 smokers                                  |
| <b>Krennmair (1)</b> | 2016 | CCT (unicenter)   | Austria / University       | 41 (21/20)    | NM (62.9)    | Delayed (2 mo)     | Md     | Camlog Screw-line (Promote+, Wimsheim, Germany)                                                                                                                                                        | 5 light smokers                            |
| <b>Krennmair (2)</b> | 2019 | PS (unicenter)    | Austria / Private practice | 85 (39/46)    | NM (56.7)    | Delayed (5-7 mo)   | Mx     | Camlog Screw-line (Promote+, Wimsheim, Germany)                                                                                                                                                        | 15 smokers                                 |
| <b>Kumar</b>         | 2002 | RA (unicenter)    | USA / Private Practice     | 461 (NM)      | NM           | Delayed (6-12 wk)  | Mx, Md | Sandblasted and acid-etched (SLA, ITI, Straumann, Waldenburg, Switzerland)                                                                                                                             | 72 heavy smokers                           |
| <b>Lambert</b>       | 2000 | CCT (multicenter) | USA / Public Hospital      | 662 (NM)      | NM           | NM                 | Mx, Md | NM                                                                                                                                                                                                     | 199 smokers                                |
| <b>Le</b>            | 2013 | RA (unicenter)    | USA / Private practice     | 168 (74/94)   | 34-87 (61)   | NM                 | Mx, Md | SLA (Straumann, Waldenburg, Switzerland), Astra Tech (AstraTech, Mölndal, Sweden), NM (Zimmer Dental, Warsaw, USA), NM (3i Implant Innovations, Palm Beach Gardens), NM (BioHorizons, Birmingham, USA) | 13 smokers                                 |
| <b>Lee (1)</b>       | 2018 | RA (unicenter)    | Taiwan / Private practice  | 161 (NM)      | 23-90 (53)   | Immediate, delayed | Mx, Md | IDEOSS (IDEOSS Biotech, Taipei, Taiwan)                                                                                                                                                                | Yes, but the exact number was not reported |
| <b>Lee (2)</b>       | 2020 | RCT (unicenter)   | USA / University           | 36 (13/23)    | NM (49.2)    | Immediate          | Mx     | Full OSSEOTITE Certain Tapered Implant (Biomet 3i, Palm Beach Gardens, USA)                                                                                                                            | 2 light smokers                            |
| <b>Leventi</b>       | 2014 | RA (unicenter)    | Scotland / University      | 41 (16/25)    | 45-88 (65.4) | Delayed (>3 mo)    | Md     | NM                                                                                                                                                                                                     | 9 smokers                                  |
| <b>Levin (1)</b>     | 2008 | RA (unicenter)    | Israel / Private practice  | 55 (NM)       | 18-78 (45)   | NM                 | Mx, Md | NM                                                                                                                                                                                                     | 6 smokers                                  |
| <b>Levin (2)</b>     | 2011 | CCT (unicenter)   | Israel / Private practice  | 717 (273/444) | NM (46-54)   | NM                 | Mx, Md | NM                                                                                                                                                                                                     | 103 heavy smokers                          |
| <b>Lin</b>           | 2012 | RA (multicenter)  | USA / University           | 75 (32/43)    | NM (59.6)    | Delayed (1 mo)     | Mx     | NM                                                                                                                                                                                                     | 28 smokers                                 |
| <b>Lindquist</b>     | 1997 | CCT (unicenter)   | Sweden / University        | 45 (13/32)    | 33-64 (65)   | Delayed (4 mo)     | Md     | Brånemark (Nobel Biocare, Göteborg, Sweden)                                                                                                                                                            | 21 light, heavy, and extra-heavy smokers   |
| <b>Lini</b>          | 2019 | RA (unicenter)    | Italy / University         | 67 (45/22)    | NM (65)      | Delayed (2-6 mo)   | Mx, Md | Frialit-2 (Friadent)                                                                                                                                                                                   | NM                                         |
| <b>Lobato</b>        | 2020 | RCT (unicenter)   | Brazil / University        | 44 (NM)       | 25-77 (50.8) | Delayed (4-6 mo)   | Mx, Md | Alvim, Drive, and Titamax (Neodent, Curitiba, Brazil)                                                                                                                                                  | Light and heavy smokers                    |

|                       |      |                   |                             |                |              |                        |        |                                                                            |                                                                           |
|-----------------------|------|-------------------|-----------------------------|----------------|--------------|------------------------|--------|----------------------------------------------------------------------------|---------------------------------------------------------------------------|
| <b>Locante</b>        | 2004 | RA (unicenter)    | USA / Private practice      | 86 (35/51)     | 12-81 (NM)   | Immediate              | Mx     | Stabledent (Crystal Medical Technology, Pelham, USA)                       | 9 light, heavy, and extra-heavy smokers                                   |
| <b>Lombardo</b>       | 2020 | RA (unicenter)    | NM / University             | 98 (43/55)     | 32-77 (54.1) | Delayed (4-6 mo)       | Md     | Morse taper, Morse cone (Bicon Dental Implants, Boston, USA)               | 20 smokers                                                                |
| <b>Luongo</b>         | 2020 | PS (NM)           | NM / NM                     | 190 (97/93)    | NM (64.2)    | Delayed (6-7 mo)       | Mx     | T3 (Biomet 3i)                                                             | 42 smokers                                                                |
| <b>Malchiodi (1)</b>  | 2014 | PS (NM)           | Italy / University          | 136 (46/90)    | 48-71 (58.9) | Delayed (3-4 mo)       | Mx, Md | Endopore Dental System (Innova Corporation, Toronto, Canada)               | 32 light smokers<br>19 heavy smokers                                      |
| <b>Malchiodi (2)</b>  | 2016 | RCT (unicenter)   | Italy / University          | 40 (24/16)     | 35-75 (52)   | Delayed (3 mo)         | Mx, Md | SybronPRO XR (Sybron Implant Solutions)                                    | 10 light and heavy smokers                                                |
| <b>Maló (1)</b>       | 2013 | RA (unicenter)    | Portugal / Private clinic   | 70 (29/41)     | 35-81 (54)   | Immediate              | Mx     | NobelSpeedy Replace and Shorty (Nobel Biocare, Göteborg, Sweden)           | NM                                                                        |
| <b>Maló (2)</b>       | 2019 | RA (unicenter)    | Portugal / Private practice | 1072 (442/630) | 20-88 (55.8) | Immediate              | Mx     | MK III, MK IV, NobelSpeedy Groovy (Nobel Biocare, Göteborg, Sweden)        | 241 smokers                                                               |
| <b>Maló (3)</b>       | 2019 | RA (unicenter)    | Portugal / Private practice | 471 (185/286)  | 20-85 (57.7) | Immediate              | Md     | MK II, MK III, MK IV, NobelSpeedy Groovy (Nobel Biocare, Göteborg, Sweden) | 117 smokers                                                               |
| <b>Mastrangelo</b>    | 2018 | RCT (multicenter) | Italy / Private practice    | 102 (63/39)    | 18-72 (44)   | Delayed (4 mo)         | Mx     | NM (tioLogic Implant System, Dentaurem, Germany)                           | 28 smokers, but the degree of smoking among the patients was not reported |
| <b>Mayfield</b>       | 2001 | RA (unicenter)    | Sweden / Private practice   | 15 (7/8)       | 47-80 (71)   | NM                     | Mx, Md | Several (Nobel Biocare, ITI, Cresco IMZ )                                  | 3 smokers                                                                 |
| <b>McCarthy</b>       | 2003 | RA (unicenter)    | UK / University             | 18 (6/12)      | 18-75 (43.7) | Delayed (mean 35.4 wk) | Mx     | Brånemark (Nobel Biocare, Göteborg, Sweden)                                | 5 smokers                                                                 |
| <b>Mendonça</b>       | 2014 | RA (unicenter)    | Brazil / Private practice   | 198 (86/112)   | 45-81 (60)   | Delayed (12-18 wk)     | Mx, Md | NM                                                                         | NM                                                                        |
| <b>Merli (1)</b>      | 2017 | RCT (unicenter)   | Italy / Private practice    | 24 (9/15)      | 47-76 (63.4) | NM                     | Mx, Md | NM (Nobel Biocare, Göteborg, Sweden)                                       | 5 light and heavy smokers                                                 |
| <b>Merli (2)</b>      | 2020 | RCT (unicenter)   | Italy / Private practice    | 60 (22/38)     | 19-72 (49)   | Immediate, early       | Mx, Md | Element, Contact (Thommen Medical, Waldenburg, Switzerland)                | 7 smokers                                                                 |
| <b>Mertens</b>        | 2012 | PS (unicenter)    | Germany / University        | 15 (5/10)      | 41-69 (55.3) | Delayed (6 mo)         | Mx     | TiOblast (Astra Tech, Mölndal, Sweden)                                     | 6 smokers                                                                 |
| <b>Migliorati</b>     | 2015 | RCT (unicenter)   | Italy / University          | 48 (23/25)     | 22-70 (47.5) | Immediate              | Mx     | Tapered Effect, Bone Level SLActive (Straumann, Basel, Switzerland)        | 2 light smokers                                                           |
| <b>Mijiritsky (1)</b> | 2013 | RA (multicenter)  | Israel / Private practice   | 787 (NM)       | 18-86 (53.7) | Immediate, delayed     | Mx, Md | NM (Adin Dental Implants, Alon Tavor, Israel).                             | NM                                                                        |



|                        |      |                  |                                                                |               |                  |                  |        |                                                                                                                                                        |                         |
|------------------------|------|------------------|----------------------------------------------------------------|---------------|------------------|------------------|--------|--------------------------------------------------------------------------------------------------------------------------------------------------------|-------------------------|
| <b>Mijiritsky (2)</b>  | 2015 | RA (NM)          | Israel / NM                                                    | 20 (13/7)     | 44-67 (56)       | NM               | Mx, Md | Several (Zimmer Dental, Carlsbad, USA; Friadent, Mannheim, Germany; MIS Implants Technologies, Shlomi, Israel)                                         | 4 smokers               |
| <b>Mijiritsky (3)</b>  | 2016 | RA (multicenter) | Israel, Romania, Italy, Canada / University + Private practice | 37 (22/15)    | 37-75 (51.2)     | Delayed          | Mx     | iRaise (Maxillent Ltd, Herzliya, Israel)                                                                                                               | 2 smokers               |
| <b>Minsk</b>           | 1996 | RA (unicenter)   | USA / University                                               | 380 (NM)      | NM               | NM               | Mx, Md | Brånemark (Nobel Biocare, Göteborg, Sweden), others (ITI, 3i, IMZ, Astra)                                                                              | NM                      |
| <b>Mir-Mari</b>        | 2012 | RA (unicenter)   | Spain / Private practice                                       | 68 (24/44)    | NM (45.1)        | Delayed (4-6 mo) | Mx, Md | NM                                                                                                                                                     | 21 smokers              |
| <b>Moheng</b>          | 2005 | PS (unicenter)   | France / Hospital                                              | 93 (36/57)    | 18-85 (60.5)     | NM               | Mx, Md | Frialit-2 (Friadent, Mannheim, Germany), IMZ Twin Plus (Friadent, Mannheim, Germany)                                                                   | 15 smokers              |
| <b>Moraguez</b>        | 2016 | PS (unicenter)   | Switzerland / University                                       | 10 (4/6)      | 32-68 (49.4)     | Delayed          | Mx     | NM (Straumann, Basel, Switzerland)                                                                                                                     | 2 light smokers         |
| <b>Morales-Vadillo</b> | 2013 | RA (unicenter)   | Brazil / Private practice                                      | 154 (NM)      | 20-87 (55)       | NM               | Mx, Md | Bioform (BiomacMed, Juiz de Fora, Brazil)                                                                                                              | NM                      |
| <b>Mordenfeld</b>      | 2014 | PS (unicenter)   | Sweden / Public service                                        | 20 (6/14)     | 48-69 (62)       | Delayed (6-9 mo) | Mx     | Mk II (Nobel Biocare, Göteborg, Sweden)                                                                                                                | 9 smokers               |
| <b>Mundt</b>           | 2006 | RA (unicenter)   | Germany / Private practice                                     | 159 (65/94)   | 14.9-80.9 (54.1) | NM               | Mx, Md | TioloX implants (Dentaurum, Ispringen, Germany)                                                                                                        | NM                      |
| <b>Munoz</b>           | 2021 | RCT (unicenter)  | Spain / University                                             | 65 (32/33)    | NM (54.9)        | Delayed (10 wk)  | Mx, Md | Vega (Klockner, Spain)                                                                                                                                 | 8 smokers               |
| <b>Naeini</b>          | 2018 | CCT (unicenter)  | England / Private practice                                     | 36 (20/16)    | 28-85 (62)       | Delayed          | Mx, Md | Brånemark TiUnite (Nobel Biocare, Göteborg, Sweden)                                                                                                    | 5 smokers               |
| <b>Nedir</b>           | 2004 | CCT (unicenter)  | Switzerland / Private practice                                 | 236 (91/145)  | 18-89 (NM)       | Delayed          | Mx, Md | TPS, SLA, ITI (Straumann, Waldenburg, Switzerland)                                                                                                     | Light and heavy smokers |
| <b>Niedermayer</b>     | 2017 | RA (unicenter)   | Germany / Private practice                                     | 380 (188/192) | 23-92 (61.9)     | Immediate        | Mx, Md | NanoTite (Biomet 3i, Palm Beach Gardens, USA), Nobel Active, Nobel Speedy, Nobel Speedy Replace and Nobel Replace CC (Nobel Biocare, Göteborg, Sweden) | 141 smokers             |

|                         |      |                   |                                       |               |              |                  |        |                                                                                            |                                       |
|-------------------------|------|-------------------|---------------------------------------|---------------|--------------|------------------|--------|--------------------------------------------------------------------------------------------|---------------------------------------|
| <b>Nitzan</b>           | 2005 | RA (unicenter)    | Israel / Private practice             | 161 (NM)      | 23-89 (57)   | NM               | Mx, Md | NM                                                                                         | 59 light and heavy smokers            |
| <b>Noelken</b>          | 2020 | RCT (unicenter)   | Germany / Private practice            | 50 (18/32)    | 23-73 (47)   | Delayed (>3 mo)  | Mx, Md | OsseoSpeed (Astra Tech, Mölndal, Sweden)                                                   | 7 light smokers<br>1 heavy smoker     |
| <b>Nogueira</b>         | 2018 | PS (unicenter)    | Brazil / University                   | 45 (11/34)    | 48-80 (63.4) | Delayed (3 mo)   | Md     | Titamax (Neodent, Curitiba, Brazil)                                                        | 5 light smokers                       |
| <b>Noguerol</b>         | 2006 | RA (unicenter)    | Spain / Private practice              | 316 (NM)      | NM           | NM               | Mx, Md | Brånemark (Nobel Biocare, Göteborg, Sweden)                                                | Light, heavy, and extra-heavy smokers |
| <b>Norton</b>           | 2017 | PS (unicenter)    | United Kingdom / Private practice     | 22 (10/12)    | 22-79 (NM)   | Immediate        | Mx, Md | Astra Tech AV (Dentsply, Mölndal, Sweden)                                                  | Light smokers                         |
| <b>Nyström</b>          | 2009 | PS (unicenter)    | Sweden / University                   | 26 (13/13)    | 38-70 (54.7) | Delayed (4-8 wk) | Mx     | Brånemark (Nobel Biocare, Göteborg, Sweden)                                                | 6 smokers                             |
| <b>Oliva</b>            | 2012 | RA (unicenter)    | Spain / Private practice              | 17 (11/6)     | NM (52.88)   | Delayed (4 mo)   | Mx, Md | SLA, ITI (Straumann, Waldenburg, Switzerland), SSII (Osstem, Surrey, UK)                   | 8 smokers                             |
| <b>Olmedo-Gaya</b>      | 2016 | RA (unicenter)    | Spain / Private practice              | 142 (52/90)   | 20-78 (48.5) | Delayed          | Mx, Md | BTI (Biotechnology Institute)                                                              | 37 smokers                            |
| <b>Olson</b>            | 2000 | RA (multicenter)  | USA / University, Public institution  | 29 (28/1)     | 34-78 (56)   | NM               | Mx     | NM                                                                                         | NM                                    |
| <b>Omran</b>            | 2015 | RA (unicenter)    | USA / University                      | NM            | ≥18          | NM               | Mx, Md | Several (Astra Tech Osseospeed, Biomet 3i, NobelReplace)                                   | Yes, but exact number not informed    |
| <b>Park</b>             | 2019 | RA (unicenter)    | South Korea / Private practice        | 207 (137/70)  | 35-70 (51.1) | Delayed (6 mo)   | Mx     | NM                                                                                         | 98 smokers                            |
| <b>Patil</b>            | 2020 | RCT (unicenter)   | Malaysia / University                 | 24 (10/14)    | NM (64)      | Immediate        | Md     | Roxolid (Straumann, Basel, Switzerland)                                                    | 1 heavy smoker                        |
| <b>Peleg</b>            | 2006 | CCT (NM)          | USA, Israel / NM                      | 731 (278/453) | 42-81 (53)   | Delayed (6-9 mo) | Mx     | Spline HA cylinder MP-1 (Zimmer Dental, Carlsbad, USA), MTX (Zimmer Dental, Carlsbad, USA) | 226 smokers                           |
| <b>Penarrocha</b>       | 2014 | RA (unicenter)    | Spain / University                    | 13 (5/8)      | 30-76 (54.8) | Delayed (3 mo)   | Mx     | Phibo Avantblast (PhiboDental Solutions S.L., Barcelona, Spain)                            | 13 light smokers                      |
| <b>Penarrocha-Oltra</b> | 2019 | RCT (multicenter) | Spain / University + Private practice | 20 (7/13)     | 23-70 (51)   | Delayed (4 mo)   | Mx     | Ticare Inhex (MozoGrau, Valladolid, Spain)                                                 | 3 light smokers<br>4 heavy smokers    |

|                   |      |                      |                                                         |             |                   |                       |        |                                                                                                                 |                                    |
|-------------------|------|----------------------|---------------------------------------------------------|-------------|-------------------|-----------------------|--------|-----------------------------------------------------------------------------------------------------------------|------------------------------------|
| <b>Perez</b>      | 2020 | RCT<br>(unicenter)   | Switzerland /<br>University                             | 36 (19/17)  | 23-77 (51-<br>59) | Delayed (4 mo)        | Mx, Md | BLT (Straumann, Basel, Switzerland)                                                                             | 8 light smokers                    |
| <b>Pico</b>       | 2019 | RCT<br>(unicenter)   | Spain /<br>University                                   | 33 (NM)     | 40-76 (54)        | Delayed (3 mo)        | Mx, Md | BioniQ (LASAK)                                                                                                  | NM                                 |
| <b>Pozzi (1)</b>  | 2014 | RCT<br>(unicenter)   | Italy /<br>University                                   | 34 (15/19)  | 39-59<br>(52.2)   | Delayed (2 mo)        | Md     | NobelActive and Nobel Speedy Groovy<br>(Nobel Biocare, Göteborg, Sweden)                                        | 4 light smokers                    |
| <b>Pozzi (2)</b>  | 2014 | PS<br>(multicenter)  | Italy, USA /<br>Private<br>practice                     | 66 (28/38)  | 39-79<br>(51.3)   | Immediate             | Mx     | Nobel Speedy Replace and Groovy (Nobel<br>Biocare, Göteborg, Sweden)                                            | 16 light smokers                   |
| <b>Pozzi (3)</b>  | 2015 | RA (unicenter)       | Italy /<br>University                                   | 22 (11/11)  | 50-83<br>(68.3)   | Immediate             | Mx, Md | TiUnite (Nobel Biocare, Göteborg,<br>Sweden)                                                                    | 3 light smokers                    |
| <b>Pozzi (4)</b>  | 2016 | PS (unicenter)       | Italy /<br>University                                   | 18 (7/11)   | 58-73<br>(65.4)   | Delayed (3 mo)        | Mx, Md | Nobel Replace (Nobel Biocare, Göteborg,<br>Sweden)                                                              | 2 light smokers                    |
| <b>Prati</b>      | 2020 | PS<br>(multicenter)  | Italy /<br>University +<br>Private<br>practice          | 76 (34/42)  | NM<br>(55.6)      | Delayed (3 mo)        | Mx, Md | Premium SP (Sweden & Martina, Due<br>Carrare, Italy)                                                            | 8 heavy smokers                    |
| <b>Queridinha</b> | 2016 | RA (unicenter)       | Portugal /<br>Private<br>practice                       | 60 (21/39)  | NM (64.1)         | Immediate             | Mx     | Mk II, Mk III, Mk IV, TiUnite, NobelSpeedy<br>Groovy, NobelReplace Tapered (Nobel<br>Biocare, Göteborg, Sweden) | NM                                 |
| <b>Raabe</b>      | 2021 | RA (unicenter)       | Switzerland /<br>University                             | 55 (18/37)  | 26-87<br>(60.8)   | Delayed (>2 mo)       | Mx, Md | SLA, SLActive (Straumann, Basel,<br>Switzerland)                                                                | 2 light smokers<br>3 heavy smokers |
| <b>Raes (1)</b>   | 2015 | CCT<br>(multicenter) | Belgium, Italy<br>/ Private<br>practice +<br>University | 85 (42/43)  | NM                | Immediate             | Mx     | Osseospeed (Astra Tech, Mölndal,<br>Sweden)                                                                     | 46 smokers                         |
| <b>Raes (2)</b>   | 2018 | PS<br>(multicenter)  | Italy, Belgium<br>/ Private<br>practice +<br>University | 46 (23/23)  | 18-73<br>(44.5)   | Immediate             | Mx, Md | AnyRidge (MegaGen Implant, Gyeongbuk,<br>South Korea)                                                           | 17 smokers                         |
| <b>Ramaglia</b>   | 2015 | PS (unicenter)       | Italy /<br>University                                   | 21 (13/8)   | 30-53 (39)        | Delayed (4 mo)        | Mx     | NM (Biomet 3i, Palm Beach, USA)                                                                                 | 8 smokers                          |
| <b>Rasperini</b>  | 2014 | RA<br>(multicenter)  | Italy /<br>University                                   | 120 (NM)    | NM (46-<br>51)    | Delayed (4-6<br>mo)   | Mx, Md | Brånemark machined (Nobel Biocare,<br>Göteborg, Sweden), TPS (Straumann,<br>Basel, Switzerland)                 | 40 smokers                         |
| <b>Ravida (1)</b> | 2018 | RA (unicenter)       | USA /<br>University                                     | 45 (24/21)  | 22-83<br>(58.9)   | Immediate,<br>delayed | Mx, Md | Several                                                                                                         | 5 smokers                          |
| <b>Ravida (2)</b> | 2019 | RA (unicenter)       | USA /<br>University                                     | 145 (64/81) | NM (69.7)         | NM                    | Mx, Md | NM                                                                                                              | 39 smokers                         |

|                          |      |                     |                                   |                  |                                      |                              |        |                                                                                                                                                                                                                                                |                                          |
|--------------------------|------|---------------------|-----------------------------------|------------------|--------------------------------------|------------------------------|--------|------------------------------------------------------------------------------------------------------------------------------------------------------------------------------------------------------------------------------------------------|------------------------------------------|
| <b>Roccuzzo</b>          | 2016 | CCT<br>(unicenter)  | Italy / Private<br>practice       | 128 (52/76)      | NM (52.4)                            | Delayed (6-10<br>wk)         | Md     | SLA (Straumann, Basel, Switzerland)                                                                                                                                                                                                            | 21 smokers                               |
| <b>Rodriguez-Argueta</b> | 2011 | RA (unicenter)      | Spain /<br>University             | 295<br>(127/168) | 21-68<br>(53.1)                      | NM                           | Mx, Md | Brånemark, Replace (Nobel Biocare, Göteborg, Sweden), DEFCON Tissue Care (Impladent SL, Sentmenat, Spain), NM (AstraTech, Mölndal, Sweden)                                                                                                     | 113 smokers                              |
| <b>Romandini</b>         | 2019 | RA (unicenter)      | Italy /<br>University             | 52 (24/28)       | NM (68.5)                            | NM                           | Mx, Md | Several (Straumann, Biomet 3i, Nobel Biocare, Camlog)                                                                                                                                                                                          | 10 smokers<br>4 former smokers           |
| <b>Romanos (1)</b>       | 2013 | CCT<br>(unicenter)  | Germany /<br>University           | 20 (12/8)        | NM (55.7,<br>G1)<br>NM (65.9,<br>G2) | Immediate                    | Mx, Md | Ankylos (Dentsply Implants, Mannheim, Germany)                                                                                                                                                                                                 | 8 heavy smokers                          |
| <b>Romanos (2)</b>       | 2014 | PS (unicenter)      | Germany /<br>University           | 13 (7/6)         | NM (60.8)                            | Immediate                    | Md     | Ankylos (Dentsply implants, Mölndal, Sweden)                                                                                                                                                                                                   | 5 heavy smokers                          |
| <b>Rosen (1)</b>         | 1999 | RA<br>(multicenter) | USA / Private<br>practice         | 101 (37/64)      | 31-81<br>(56.1)                      | Delayed (mean<br>7 mo)       | Mx     | Several (Dentsply Standard; Implamed standard; TPS cylinders, Implant Innovations; standard, Implant Innovations; Interpore TPS cylinders, Wurmberg, Germany; turned, Nobel Biocare, Göteborg, Sweden; TPS, Straumann Waldenburg, Switzerland) | 17 smokers                               |
| <b>Rosen (2)</b>         | 2018 | RA (unicenter)      | USA / Private<br>practice         | 75 (27/48)       | 29-88 (61)                           | Delayed (2-6<br>mo)          | Mx, Md | ProActive (Neoss Ltd., Harrogate, England)                                                                                                                                                                                                     | 6 smokers                                |
| <b>Rossi (1)</b>         | 2017 | PS (unicenter)      | Italy / Private<br>practice       | 20 (7/13)        | NM (55)                              | Delayed (2 mo)               | Mx, Md | SLActive (Straumann, Basel, Switzerland)                                                                                                                                                                                                       | 7 heavy smokers                          |
| <b>Rossi (2)</b>         | 2018 | PS (unicenter)      | Italy / Private<br>practice       | 35 (13/22)       | 28-70 (51)                           | Delayed (6 wk)               | Mx, Md | SLActive (Straumann, Basel, Switzerland)                                                                                                                                                                                                       | 10 heavy smokers                         |
| <b>Salman</b>            | 2019 | RCT<br>(unicenter)  | USA /<br>University               | 30 (18/12)       | 53-85 (66)                           | Immediate,<br>delayed (3 mo) | Md     | Osseospeed TX (Astra Tech, Mölndal, Sweden)                                                                                                                                                                                                    | 4 light smokers                          |
| <b>Sánchez-Pérez</b>     | 2007 | RA (unicenter)      | Spain / Private<br>practice       | 66 (NM)          | 15-71<br>(43.4)                      | Delayed (2 mo)               | Mx, Md | Bis (Biotech, Avignon, France)                                                                                                                                                                                                                 | 40 light, heavy, and extra-heavy smokers |
| <b>Sanna</b>             | 2007 | RA (unicenter)      | Belgium /<br>University           | 30 (18/12)       | 38-74 (56)                           | Immediate                    | Mx, Md | NM (Nobel Biocare, Göteborg, Sweden)                                                                                                                                                                                                           | 13 smokers                               |
| <b>Sanz-Martin</b>       | 2017 | RCT<br>(unicenter)  | Spain /<br>University             | 47 (21/26)       | NM (58)                              | Delayed (12 mo)              | Mx, Md | NM (Sweden & Martina, Due Carrare, Italy)                                                                                                                                                                                                      | 10 light smokers<br>1 former smoker      |
| <b>Sayadoust</b>         | 2013 | RA (unicenter)      | Sweden /<br>Public<br>institution | 80 (40/40)       | NM (53.5-<br>63.2)                   | Delayed (3-4<br>mo)          | Mx, Md | Brånemark, TiUnite (Nobel Biocare, Göteborg, Sweden)                                                                                                                                                                                           | 40 heavy smokers                         |

|                               |      |                     |                                                                           |                  |                     |                                   |        |                                                                                                                                                                                                        |                                                         |
|-------------------------------|------|---------------------|---------------------------------------------------------------------------|------------------|---------------------|-----------------------------------|--------|--------------------------------------------------------------------------------------------------------------------------------------------------------------------------------------------------------|---------------------------------------------------------|
| <b>Schlee</b>                 | 2015 | PS<br>(multicenter) | Netherlands,<br>Germany,<br>Italy, France,<br>Spain / Private<br>practice | 105 (50/55)      | 22-77<br>(55.2)     | NM                                | Mx, Md | Trabecular Meta Material ( Zimmer TMT,<br>Parsippany, USA)                                                                                                                                             | 17 light and heavy<br>smokers                           |
| <b>Schmid (1)</b>             | 2020 | RA (unicenter)      | Switzerland /<br>University                                               | 26 (12/14)       | NM (72.2)           | Delayed (3-6<br>mo)               | Mx, Md | SLA (Straumann, Basel, Switzerland)                                                                                                                                                                    | 4 smokers                                               |
| <b>Schmid (2)</b>             | 2021 | RA (unicenter)      | Switzerland /<br>University                                               | 21 (9/12)        | 45-89<br>(71.4)     | Delayed (3-6<br>mo)               | Mx, Md | SLA (Straumann, Basel, Switzerland)                                                                                                                                                                    | 1 smoker                                                |
| <b>Schneider</b>              | 2012 | RA (unicenter)      | Switzerland /<br>University                                               | 70 (27/43)       | 19.8-76.6<br>(50.7) | Early, delayed<br>(mean 12 mo)    | Mx, Md | Brånemark (Nobel Biocare, Göteborg,<br>Sweden), SLA, ITI, (Straumann,<br>Waldenburg, Switzerland)                                                                                                      | 31 smokers                                              |
| <b>Schoenbaum</b>             | 2021 | RA<br>(multicenter) | USA / Private<br>practice                                                 | 378<br>(181/197) | NM (60)             | NM                                | Mx, Md | NM                                                                                                                                                                                                     | 15% of the implants in<br>smokers and former<br>smokers |
| <b>Schwartz-<br/>Arad (1)</b> | 2000 | RA (unicenter)      | Israel /<br>University                                                    | 43 (16/27)       | 17-73 (47)          | NM                                | Mx, Md | NM                                                                                                                                                                                                     | NM                                                      |
| <b>Schwartz-<br/>Arad (2)</b> | 2012 | RA (unicenter)      | Israel /<br>University                                                    | 261 (NM)         | 18-67 (48)          | NM                                | Mx, Md | NM                                                                                                                                                                                                     | 89 light and heavy<br>smokers                           |
| <b>Schwartz-<br/>Arad (3)</b> | 2016 | RA (unicenter)      | Israel / NM                                                               | 214 (35/179)     | NM (50.3)           | Delayed (4-6<br>mo)               | Mx, Md | Several (Screw-Vent and Spline, Zimmer<br>Dental Inc., Warsaw, USA; NobelActive<br>and Replace Select, Nobel Biocare,<br>Göteborg, Sweden; Implant Direct,<br>Implant Direct LLC, Zurich, Switzerland) | 39 smokers                                              |
| <b>Shibuya</b>                | 2012 | RA (unicenter)      | Japan /<br>University                                                     | 9 (8/1)          | 22-71<br>(50.6)     | NM                                | Mx     | TiUnite (Nobel Biocare, Göteborg,<br>Sweden)                                                                                                                                                           | 5 smokers                                               |
| <b>Si (1)</b>                 | 2016 | RA (unicenter)      | China /<br>University                                                     | 80 (43/37)       | 25-70<br>(48.8)     | Delayed (3-4<br>mo)               | Mx     | NM (Straumann, Basel, Switzerland)                                                                                                                                                                     | NM                                                      |
| <b>Si (2)</b>                 | 2019 | RA (unicenter)      | China /<br>University                                                     | 156 (56/100)     | 21-82<br>(51.5)     | Delayed (3 mo)                    | Mx, Md | SLA (Straumann, Basel, Switzerland)                                                                                                                                                                    | 13 smokers                                              |
| <b>Sicilia</b>                | 2021 | RA (unicenter)      | Spain / Private<br>practice                                               | 268 (NM)         | NM                  | Delayed (8-10<br>wk)              | Md     | Turned (Lifecore Biomedical), Osseotite<br>(Biomet 3i), TiUnite (Nobel Biocare,<br>Göteborg, Sweden)                                                                                                   | 75 smokers                                              |
| <b>Siebers</b>                | 2010 | CCT<br>(unicenter)  | Germany /<br>Private<br>practice                                          | 76 (34/42)       | 22-85 (52<br>± 13)  | Immediate,<br>delayed (4-6<br>mo) | Mx, Md | Camlog Rootline and Screw Line (Camlog<br>Biotechnologies, Basel, Switzerland),<br>Osseotite (Biomet 3i, Palm Beach<br>Gardens, USA), Restore RBM (Lifecore<br>Biomedical, Chaska, USA)                | 15 smokers                                              |

|                      |      |                   |                                    |              |               |                       |        |                                                                                                                                     |                            |
|----------------------|------|-------------------|------------------------------------|--------------|---------------|-----------------------|--------|-------------------------------------------------------------------------------------------------------------------------------------|----------------------------|
| <b>Simons</b>        | 2015 | RA (unicenter)    | Belgium / University               | 185 (69/116) | 20-88 (56.4)  | Delayed (3-6 mo)      | Md     | Brånemark MK III (Nobel Biocare, Göteborg, Sweden)                                                                                  | 29 smokers                 |
| <b>Sivolella</b>     | 2020 | RCT (unicenter)   | Italy / University                 | 16 (10/6)    | NM (53.5)     | Delayed (4 mo)        | Mx, Md | Osseotite Tapered Certain Prevail (Biomet 3i)                                                                                       | 3 light smokers            |
| <b>Souza</b>         | 2019 | RA (unicenter)    | Brazil / NM                        | 10 (4/6)     | 49-70 (60)    | Delayed (6 mo)        | Mx     | Master Porous (Conexão Sistemas de Prótese Ltda, São Paulo, Brazil)                                                                 | 1 smoker                   |
| <b>Stacchi</b>       | 2021 | RA (multicenter)  | Italy / Private practice           | 156 (61/95)  | 22-86 (60.9)  | NM                    | Mx     | NM                                                                                                                                  | 29 smokers                 |
| <b>Stoker</b>        | 2012 | RCT (unicenter)   | Netherlands / University           | 94 (28/66)   | NM (59.8)     | Delayed (3 mo)        | Md     | ITI/Bonefit (Straumann, Basel, Switzerland)                                                                                         | 35 smokers                 |
| <b>Striezel</b>      | 2011 | RA (unicenter)    | Germany, Israel / Private practice | 25 (12/13)   | 45-74 (55.2)  | Immediate             | Mx, Md | Alpha Bio (Alpha-Bio Tech Ltd., Petach Tikva, Israel)                                                                               | 3 smokers                  |
| <b>Sverzut</b>       | 2008 | RA (unicenter)    | Brazil / University                | 650 (NM)     | 13-84 (42.7)  | NM                    | Mx, Md | NM                                                                                                                                  | 76 smokers                 |
| <b>Tallarico (1)</b> | 2016 | RA (NM)           | NM                                 | 56 (25/31)   | NM (66.2)     | Immediate, delayed    | Mx, Md | NobelReplace Conical Connection, NobelSpeedy Groovy, Brånemark MKIII, NobelReplace Tapered Groovy (Nobel Biocare, Göteborg, Sweden) | 3 light smokers            |
| <b>Tallarico (2)</b> | 2017 | RA (multicenter)  | Italy / Private practice           | 141 (49/92)  | 29-88 (53.3)  | Immediate, delayed    | Mx, Md | TiUnite Nobel Replace Conical Connection, Nobel Replace Select Tapered, NobelSpeedy Groovy (Nobel Biocare, Göteborg, Sweden)        | Light and heavy smokers    |
| <b>Tallarico (3)</b> | 2018 | RCT (multicenter) | Italy / Private practice           | 20 (10/10)   | 28-84 (61-67) | Delayed (4 mo)        | Mx, Md | NobelSpeedy Groovy (Nobel Biocare, Göteborg, Sweden)                                                                                | 1 heavy smoker             |
| <b>Tartaglia</b>     | 2016 | RA (unicenter)    | Italy / Private practice           | 113 (53/60)  | 42-90 (65)    | Immediate             | Mx, Md | Milde (Titanmed, Bergamo, Italy)                                                                                                    | 18 smokers                 |
| <b>Taschieri</b>     | 2018 | RCT (unicenter)   | Italy / University                 | 52 (22/30)   | 31-77 (52)    | Delayed (5-7 mo)      | Mx     | Interna, Universal Platform and Universal Plus Platform (BTI Biotechnology Institute, Vitoria-Gasteiz, Spain)                       | 12 light and heavy smokers |
| <b>Tattan</b>        | 2021 | RA (unicenter)    | USA / University                   | 201 (95/106) | 45-69 (60)    | NM                    | Mx, Md | NM                                                                                                                                  | 37 smokers                 |
| <b>Tawil</b>         | 2008 | CCT (unicenter)   | Lebanon / Private practice         | 90 (57/33)   | 43-84 (64.7)  | Immediate, delayed    | Mx, Md | Brånemark, TiUnite (Nobel Biocare, Göteborg, Sweden)                                                                                | 40 smokers                 |
| <b>Tealdo</b>        | 2015 | RA (unicenter)    | Italy / University                 | 4 (3/1)      | 41-65 (54)    | Immediate             | Md     | NM (Nobel Biocare, Göteborg, Sweden)                                                                                                | 2 smokers                  |
| <b>Temmerman</b>     | 2015 | PS (unicenter)    | Belgium / University               | 28 (3/25)    | 42-76 (63)    | Delayed (mean 3.6 mo) | Mx, Md | NM (Astra Tech, Dentsply Implants, Mölndal, Sweden)                                                                                 | Light and heavy smokers    |

|                        |      |                      |                                                                                            |                  |                 |                                   |        |                                                                                                     |                                                   |
|------------------------|------|----------------------|--------------------------------------------------------------------------------------------|------------------|-----------------|-----------------------------------|--------|-----------------------------------------------------------------------------------------------------|---------------------------------------------------|
| <b>Testori (1)</b>     | 2001 | PS<br>(multicenter)  | Italy, Canada,<br>Ireland, USA /<br>Private<br>Practice                                    | 181 (76/105)     | 18-86<br>(55.4) | Delayed (4-6<br>mo)               | Mx, Md | Osseotite NanoTite Tapered (Biomet 3i,<br>Palm Beach Gardens, USA)                                  | 37 light smokers                                  |
| <b>Testori (2)</b>     | 2014 | RA (unicenter)       | Italy /<br>University                                                                      | 80 (38/42)       | NM (59)         | Immediate,<br>delayed             | Mx, Md | NM (Biomet 3i, Palm Beach Gardens, USA)                                                             | 11 light smokers<br>15 heavy smokers              |
| <b>Testori (3)</b>     | 2017 | RA<br>(multicenter)  | Italy / NM                                                                                 | 27 (8/19)        | 39-69 (57)      | Immediate                         | Mx     | NM (Biomet 3i, Palm Beach Gardens, USA)                                                             | 3 light smokers                                   |
| <b>Testori (4)</b>     | 2017 | RA (unicenter)       | Italy / Private<br>practice                                                                | 21 (11/10)       | 24-73<br>(55.6) | Immediate,<br>delayed             | Mx, Md | T3 (Biomet 3i, Palm Beach Gardens, USA)                                                             | 1 light smoker<br>1 heavy smoker<br>1 pipe smoker |
| <b>Thoma (1)</b>       | 2018 | RCT<br>(multicenter) | Switzerland,<br>Poland,<br>Austria, Spain,<br>USA /<br>University +<br>Private<br>practice | 101 (49/52)      | 20-75<br>(50.5) | Delayed (5 mo)                    | Mx     | Osseospeed (Astra Tech, Mölndal,<br>Sweden)                                                         | NM                                                |
| <b>Thoma (2)</b>       | 2019 | RA (unicenter)       | Switzerland /<br>University                                                                | 38 (18/20)       | 30-92<br>(62.8) | NM                                | Mx, Md | NM (Nobel Biocare, Göteborg, Sweden)<br>NM (Straumann, Basel, Switzerland)                          | 2 light smokers                                   |
| <b>Thoma (3)</b>       | 2020 | RCT<br>(unicenter)   | Switzerland /<br>University                                                                | 20 (7/13)        | NM (44)         | Delayed (3 mo)                    | Mx, Md | NM                                                                                                  | 2 smokers                                         |
| <b>Troiano</b>         | 2021 | RA (unicenter)       | Italy / Private<br>practice                                                                | 109 (63/46)      | NM (58.1)       | Immediate,<br>Delayed (2-4<br>mo) | Mx, Md | Several (3i, JD Dental Care, Astra Tech,<br>Sweden & Martina, SIN, Henry Schein<br>Krugg, Biosfera) | 31 smokers                                        |
| <b>Twito</b>           | 2014 | RA (unicenter)       | Israel /<br>Military clinic                                                                | NM               | 22-55 (41)      | Immediate,<br>delayed             | Mx, Md | NM                                                                                                  | NM                                                |
| <b>Urdaneta</b>        | 2012 | RA (unicenter)       | USA / Private<br>practice                                                                  | 291<br>(147/144) | NM              | NM                                | Mx, Md | Integra-CP (Bicon, Boston, USA)                                                                     | 22 smokers                                        |
| <b>Uribarri</b>        | 2017 | CCT<br>(unicenter)   | Spain /<br>University                                                                      | 104 (44/60)      | 38-78 (52)      | Delayed (6 mo)                    | Mx     | Osseospeed (Astra Tech, Mölndal,<br>Sweden)<br>SLActive (Straumann, Basel, Switzerland)             | 12 smokers                                        |
| <b>Van Steenberghe</b> | 2004 | PS (unicenter)       | Belgium /<br>University                                                                    | 50 (25/25)       | 45-80<br>(56.5) | Immediate                         | Md     | Brånemark (Nobel Biocare, Göteborg,<br>Sweden)                                                      | 13 heavy smokers                                  |
| <b>Vandeweghe (1)</b>  | 2011 | RA<br>(multicenter)  | Belgium /<br>Private<br>practice                                                           | 329<br>(141/188) | 18-84 (54)      | Immediate,<br>delayed             | Mx, Md | NM (Southern Implants, Irene, South<br>Africa)                                                      | 41 smokers                                        |

|                       |      |                  |                                                |               |              |                             |        |                                                                                                          |                                 |
|-----------------------|------|------------------|------------------------------------------------|---------------|--------------|-----------------------------|--------|----------------------------------------------------------------------------------------------------------|---------------------------------|
| <b>Vandeweghe (2)</b> | 2012 | RA (multicenter) | South Africa, UK, Germany / Private practice   | 75 (31/44)    | 25-82 (58)   | Immediate, delayed (3 mo)   | Mx, Md | Sandblasted (Max Southern Implants, Irene, South Africa)                                                 | 10 light and heavy smokers      |
| <b>Vandeweghe (3)</b> | 2013 | RA (multicenter) | Greece, Belgium / Private practice, University | 38 (16/22)    | 20-82 (49)   | Immediate                   | Mx, Md | Sandblasted (Southern Implants, Irene, South Africa)                                                     | 5 smokers                       |
| <b>Vervaeke</b>       | 2015 | RA (unicenter)   | Belgium / Private Practice                     | 376 (166/210) | 17-82 (56)   | Immediate, delayed          | Mx, Md | Osseospeed (Astra Tech, Mölndal, Sweden)                                                                 | NM                              |
| <b>Waechter</b>       | 2017 | RCT (unicenter)  | Brazil / University                            | 20 (7/13)     | NM (50.8)    | Delayed (3 mo)              | Md     | Duo, Integra (Signo Vincens)                                                                             | 2 light smokers                 |
| <b>Wagenberg (1)</b>  | 2006 | RA (unicenter)   | USA / University                               | 891 (281/510) | 14-94 (57.9) | Immediate, delayed (3-6 mo) | Mx, Md | Brånemark (Nobel Biocare, Göteborg, Sweden), Osseotite (3i Implant Innovations, Palm Beach Gardens, USA) | NM                              |
| <b>Wagenberg (2)</b>  | 2013 | RA (unicenter)   | USA / Private practice                         | 541 (NM)      | 12-88 (58)   | Immediate, delayed          | Mx, Md | NM                                                                                                       | Heavy smokers                   |
| <b>Wallace</b>        | 2000 | RA (unicenter)   | UK / NM                                        | 56 (29/27)    | NM           | NM                          | Mx, Md | NM                                                                                                       | 17 smokers                      |
| <b>Wang (1)</b>       | 2016 | RA (unicenter)   | China / University                             | 26 (15/11)    | 55-76 (64)   | Delayed (3 mo)              | Mx     | Tissue Level (Straumann, Basel, Switzerland)                                                             | 8 light smokers                 |
| <b>Wang (2)</b>       | 2020 | RCT (unicenter)  | USA / University                               | 49 (15/34)    | 25-70 (46.8) | Immediate, Delayed (3 mo)   | Mx, Md | NobelParallel Conical Connection (Nobel Biocare, Göteborg, Sweden)                                       | 1 light smoker                  |
| <b>Wennström</b>      | 2004 | RCT (unicenter)  | Sweden / University                            | 51 (20/31)    | 36-80 (59.5) | Delayed (3-6 mo)            | Mx, Md | Tioblast (Astra Tech, Mölndal, Sweden)                                                                   | 17 smokers                      |
| <b>Werbelow</b>       | 2020 | RA (unicenter)   | Germany / Private practice                     | 23 (13/10)    | 42-74 (64)   | Immediate                   | Mx, Md | blueSKY© (Bredent GmbH & Co. KG, Senden, Germany)                                                        | 2 smokers                       |
| <b>Widmark</b>        | 2001 | RA (unicenter)   | Sweden / Public Service                        | 36 (13/23)    | NM           | 6-8 months                  | Mx     | Brånemark (Nobel Biocare, Göteborg, Sweden)                                                              | 11 smokers                      |
| <b>Windael (1)</b>    | 2018 | PS (unicenter)   | Belgium / University                           | 21 (8/13)     | 49-84 (68.4) | Immediate                   | Md     | Osseospeed (Astra Tech, Mölndal, Sweden)                                                                 | 1 smoker<br>6 former smokers    |
| <b>Windael (2)</b>    | 2021 | RA (unicenter)   | Belgium / Private practice                     | 407 (186/221) | 28-92 (64.9) | Immediate, Delayed (3 mo)   | Mx, Md | Osseospeed (Astra Tech, Mölndal, Sweden)                                                                 | 50 smokers<br>66 former smokers |
| <b>Wolf</b>           | 2021 | RA (unicenter)   | Germany / University                           | 121 (91/30)   | 45-89 (65.7) | NM                          | Mx, Md | Several (Dentsply Sirona, Straumann, Camlog, Nobel Biocare)                                              | 27 smokers                      |



|                     |      |                |                                |               |              |                                  |        |                                                                                         |                       |
|---------------------|------|----------------|--------------------------------|---------------|--------------|----------------------------------|--------|-----------------------------------------------------------------------------------------|-----------------------|
| <b>Wu (1)</b>       | 2014 | RA (unicenter) | Canada / Private practice      | 490 (198/292) | 17-93 (56.4) | Immediate, delayed (mean 5.1 mo) | Mx, Md | Brånemark (Nobel Biocare, Göteborg, Sweden)                                             | Heavy smokers         |
| <b>Wu (2)</b>       | 2016 | RA (unicenter) | Canada / Private practice      | 728 (375/353) | 18-93 (57.7) | Immediate, Delayed               | Mx, Md | TiUnite (Nobel Biocare, Göteborg, Sweden)                                               | 83 smokers            |
| <b>Wu (3)</b>       | 2017 | RA (unicenter) | Canada / University            | 799 (369/430) | 18-93 (56.6) | NM                               | Mx, Md | TiUnite (Nobel Biocare, Göteborg, Sweden)                                               | Any degree of smoking |
| <b>Wu (4)</b>       | 2018 | RA (unicenter) | China / University             | 72 (42/30)    | NM (47)      | Delayed (3-6 mo)                 | Mx, Md | XiVE S Plus (Dentsply implants, Mölndal, Sweden)                                        | 9 light smokers       |
| <b>Zafiropoulos</b> | 2010 | RA (unicenter) | Germany / Private practice     | 252 (135/117) | 43-70 (49)   | Immediate                        | Mx, Md | Camlog root line (Altatec, Wimsheim, Germany), SLA (Straumann, Waldenburg, Switzerland) | 86 light smokers      |
| <b>Zembic</b>       | 2016 | PS (unicenter) | Netherlands / University       | 20 (15/5)     | 45-84 (61)   | Delayed (3-5 mo)                 | Mx     | Roxolid Tissue Level (Straumann, Basel, Switzerland)                                    | 6 smokers             |
| <b>Zinser</b>       | 2013 | RA (unicenter) | Netherlands / Public Hospital  | 224 (120/104) | 35-81 (56)   | Delayed (3-6 mo)                 | Mx     | NM                                                                                      | NM                    |
| <b>Zumstein</b>     | 2019 | RA (unicenter) | Switzerland / Private practice | 51 (22/29)    | NM (58.2)    | Immediate, delayed               | Mx, Md | Neoss ProActive Straight (Neoss Ltd, Harrogate, UK)                                     | 4 smokers             |

NM – not mentioned; RA – retrospective analysis; PS – prospective study; CCT – controlled clinical trial; RCT – randomized controlled trial

G1 – group smokers; G2 – group non-smokers

d – days; wk – weeks; mo – months; Mx – maxilla; Md – mandible

<sup>a</sup> light smokers <10 cig/day; heavy smokers >10 cig/day; extra-heavy smokers >20 cig/day





|                |      |   |   |   |   |   |   |   |   |   |   |     |
|----------------|------|---|---|---|---|---|---|---|---|---|---|-----|
| Chrcanovic (3) | 2018 | 1 | 1 | 0 | 1 | 1 | 1 | 1 | 1 | 1 | 1 | 8/9 |
| Clauser        | 2020 | 1 | 1 | 1 | 1 | 1 | 1 | 1 | 1 | 1 | 1 | 9/9 |
| Conrad         | 2011 | 1 | 1 | 0 | 1 | 1 | 1 | 1 | 1 | 1 | 1 | 8/9 |
| Corvino        | 2020 | 1 | 1 | 0 | 1 | 1 | 1 | 1 | 0 | 1 | 1 | 7/9 |
| Coskunses      | 2021 | 1 | 1 | 1 | 1 | 1 | 1 | 1 | 1 | 1 | 1 | 9/9 |
| Crespi         | 2019 | 1 | 1 | 0 | 1 | 1 | 1 | 1 | 1 | 1 | 1 | 8/9 |
| Cristalli      | 2015 | 1 | 1 | 1 | 1 | 1 | 1 | 1 | 1 | 1 | 1 | 9/9 |
| Cucchi         | 2019 | 1 | 1 | 0 | 1 | 1 | 1 | 1 | 1 | 1 | 1 | 8/9 |
| Daher          | 2019 | 1 | 1 | 0 | 1 | 1 | 1 | 1 | 1 | 1 | 1 | 8/9 |
| Daneshvar      | 2016 | 1 | 1 | 1 | 1 | 1 | 1 | 1 | 0 | 1 | 1 | 8/9 |
| Daubert        | 2015 | 1 | 1 | 1 | 1 | 1 | 1 | 1 | 1 | 1 | 1 | 9/9 |
| De Bruyn (1)   | 1994 | 1 | 1 | 0 | 1 | 1 | 1 | 1 | 0 | 1 | 1 | 7/9 |
| De Bruyn (2)   | 1999 | 1 | 1 | 0 | 1 | 1 | 1 | 1 | 0 | 1 | 1 | 7/9 |
| Degidi         | 2015 | 1 | 1 | 0 | 1 | 1 | 1 | 1 | 1 | 1 | 1 | 8/9 |
| Deli           | 2014 | 1 | 1 | 0 | 1 | 1 | 1 | 1 | 0 | 1 | 1 | 7/9 |
| D'haese        | 2013 | 1 | 1 | 0 | 1 | 1 | 1 | 1 | 0 | 1 | 1 | 7/9 |
| Di Stefano     | 2020 | 1 | 1 | 0 | 1 | 1 | 1 | 1 | 1 | 1 | 1 | 8/9 |
| Doan           | 2014 | 1 | 1 | 1 | 1 | 1 | 1 | 1 | 0 | 1 | 1 | 8/9 |
| Donati (1)     | 2015 | 1 | 1 | 0 | 1 | 1 | 1 | 1 | 1 | 1 | 1 | 8/9 |
| Donati (2)     | 2018 | 1 | 1 | 0 | 1 | 1 | 1 | 1 | 1 | 1 | 1 | 8/9 |
| Donos          | 2019 | 1 | 1 | 0 | 1 | 1 | 1 | 1 | 0 | 1 | 1 | 7/9 |
| Doyle          | 2007 | 1 | 1 | 0 | 1 | 1 | 1 | 1 | 0 | 1 | 1 | 7/9 |
| Engstrand      | 2003 | 1 | 1 | 1 | 1 | 1 | 1 | 1 | 1 | 1 | 1 | 9/9 |
| Feher          | 2020 | 1 | 1 | 0 | 1 | 1 | 1 | 1 | 1 | 1 | 1 | 8/9 |
| Felice         | 2015 | 1 | 1 | 1 | 1 | 1 | 1 | 1 | 1 | 1 | 1 | 9/9 |
| Flores-Guillen | 2018 | 1 | 1 | 1 | 1 | 1 | 1 | 1 | 1 | 1 | 1 | 9/9 |
| Fonseca        | 2021 | 1 | 1 | 0 | 1 | 1 | 1 | 1 | 1 | 1 | 1 | 8/9 |
| Francetti (1)  | 2014 | 1 | 1 | 0 | 1 | 1 | 1 | 1 | 0 | 1 | 1 | 7/9 |
| Francetti (2)  | 2019 | 1 | 1 | 0 | 1 | 1 | 1 | 1 | 1 | 1 | 1 | 8/9 |
| Friberg        | 2008 | 1 | 1 | 1 | 1 | 1 | 1 | 1 | 1 | 1 | 1 | 9/9 |
| Gamper         | 2017 | 1 | 1 | 1 | 1 | 1 | 1 | 1 | 1 | 1 | 1 | 9/9 |
| Gander         | 2014 | 1 | 1 | 1 | 1 | 1 | 1 | 1 | 1 | 1 | 1 | 9/9 |
| Gaspersic      | 2021 | 1 | 1 | 0 | 1 | 1 | 1 | 1 | 1 | 1 | 1 | 8/9 |
| Geurs          | 2001 | 1 | 1 | 0 | 1 | 1 | 1 | 1 | 0 | 1 | 1 | 7/9 |
| Ghazal         | 2019 | 1 | 1 | 0 | 1 | 1 | 1 | 1 | 1 | 1 | 1 | 8/9 |

|                 |      |   |   |   |   |   |   |   |   |   |   |     |
|-----------------|------|---|---|---|---|---|---|---|---|---|---|-----|
| Gherlone        | 2016 | 1 | 1 | 0 | 1 | 1 | 1 | 1 | 1 | 1 | 1 | 8/9 |
| Gjelvold        | 2020 | 1 | 1 | 1 | 1 | 1 | 1 | 1 | 1 | 1 | 1 | 9/9 |
| Gorman          | 1994 | 1 | 1 | 0 | 1 | 1 | 1 | 1 | 0 | 1 | 1 | 7/9 |
| Grandi (1)      | 2012 | 1 | 1 | 1 | 1 | 1 | 1 | 1 | 1 | 1 | 1 | 9/9 |
| Grandi (2)      | 2012 | 1 | 1 | 0 | 1 | 1 | 1 | 1 | 1 | 1 | 1 | 8/9 |
| Grandi (3)      | 2012 | 1 | 1 | 1 | 1 | 1 | 1 | 1 | 1 | 1 | 1 | 9/9 |
| Grandi (4)      | 2013 | 1 | 1 | 1 | 1 | 1 | 1 | 1 | 1 | 1 | 1 | 9/9 |
| Grandi (5)      | 2014 | 1 | 1 | 0 | 1 | 1 | 1 | 1 | 1 | 1 | 1 | 8/9 |
| Grandi (6)      | 2015 | 1 | 1 | 1 | 1 | 1 | 1 | 1 | 1 | 1 | 1 | 9/9 |
| Grisar          | 2017 | 1 | 1 | 1 | 1 | 1 | 1 | 1 | 1 | 1 | 1 | 9/9 |
| Groenendijk     | 2020 | 1 | 1 | 1 | 1 | 1 | 1 | 1 | 0 | 1 | 1 | 8/9 |
| Grossmann       | 2008 | 1 | 1 | 1 | 1 | 1 | 1 | 1 | 0 | 1 | 1 | 8/9 |
| Grunder         | 1999 | 1 | 1 | 0 | 1 | 1 | 1 | 1 | 1 | 1 | 1 | 8/9 |
| Guarnieri (1)   | 2019 | 1 | 1 | 1 | 1 | 1 | 1 | 1 | 1 | 1 | 1 | 9/9 |
| Guarnieri (2)   | 2020 | 1 | 1 | 1 | 1 | 1 | 1 | 1 | 1 | 1 | 1 | 9/9 |
| Guida           | 2020 | 1 | 1 | 0 | 1 | 1 | 1 | 1 | 1 | 1 | 1 | 8/9 |
| Göthberg        | 2018 | 1 | 1 | 0 | 1 | 1 | 1 | 1 | 1 | 1 | 1 | 8/9 |
| Habsha          | 2000 | 1 | 1 | 1 | 1 | 1 | 1 | 1 | 1 | 1 | 1 | 9/9 |
| Hakam           | 2021 | 1 | 1 | 0 | 1 | 1 | 1 | 1 | 1 | 1 | 1 | 8/9 |
| Han             | 2018 | 1 | 1 | 0 | 1 | 1 | 1 | 1 | 1 | 1 | 1 | 8/9 |
| Hartlev         | 2021 | 1 | 1 | 1 | 1 | 1 | 1 | 1 | 1 | 1 | 1 | 9/9 |
| Hattingh (1)    | 2018 | 1 | 1 | 0 | 1 | 1 | 1 | 1 | 0 | 1 | 1 | 7/9 |
| Hattingh (2)    | 2019 | 1 | 1 | 0 | 1 | 1 | 1 | 1 | 1 | 1 | 1 | 8/9 |
| He              | 2015 | 1 | 1 | 1 | 1 | 1 | 1 | 1 | 1 | 1 | 1 | 9/9 |
| Higuchi         | 2020 | 1 | 1 | 0 | 1 | 1 | 1 | 1 | 0 | 1 | 1 | 7/9 |
| Hingsammer      | 2018 | 1 | 1 | 0 | 1 | 1 | 1 | 1 | 1 | 1 | 1 | 8/9 |
| Hinze           | 2010 | 1 | 1 | 0 | 1 | 1 | 1 | 1 | 0 | 1 | 1 | 7/9 |
| Hof             | 2014 | 1 | 1 | 1 | 1 | 1 | 1 | 1 | 1 | 1 | 1 | 9/9 |
| Holahan         | 2008 | 1 | 1 | 0 | 1 | 1 | 1 | 1 | 1 | 1 | 1 | 8/9 |
| Horwitz         | 2012 | 1 | 1 | 0 | 1 | 1 | 1 | 1 | 0 | 1 | 1 | 7/9 |
| Hsu             | 2016 | 1 | 1 | 0 | 1 | 1 | 1 | 1 | 1 | 1 | 1 | 8/9 |
| Hu              | 2020 | 1 | 1 | 1 | 1 | 1 | 1 | 1 | 1 | 0 | 1 | 8/9 |
| Ibañez (1)      | 2003 | 1 | 1 | 0 | 1 | 1 | 1 | 1 | 0 | 1 | 1 | 7/9 |
| Ibañez (2)      | 2005 | 1 | 1 | 1 | 1 | 1 | 1 | 1 | 0 | 1 | 1 | 8/9 |
| Iorio-Siciliano | 2016 | 1 | 1 | 0 | 1 | 1 | 1 | 1 | 0 | 1 | 1 | 7/9 |

|               |      |   |   |   |   |   |   |   |   |   |     |
|---------------|------|---|---|---|---|---|---|---|---|---|-----|
| Ji            | 2012 | 1 | 1 | 0 | 1 | 1 | 1 | 1 | 0 | 1 | 7/9 |
| Jones         | 1999 | 1 | 1 | 0 | 1 | 1 | 1 | 1 | 0 | 1 | 7/9 |
| Kan           | 1999 | 1 | 1 | 0 | 1 | 1 | 1 | 1 | 0 | 1 | 7/9 |
| Karoussis     | 2003 | 1 | 1 | 0 | 1 | 1 | 1 | 1 | 1 | 1 | 8/9 |
| Keller        | 1999 | 1 | 1 | 1 | 1 | 1 | 1 | 1 | 0 | 1 | 8/9 |
| Khouly        | 2017 | 1 | 1 | 1 | 1 | 1 | 1 | 1 | 1 | 0 | 8/9 |
| Kim           | 2015 | 1 | 1 | 0 | 1 | 1 | 1 | 1 | 1 | 1 | 8/9 |
| Kinsel        | 2007 | 1 | 1 | 1 | 1 | 1 | 1 | 1 | 1 | 1 | 9/9 |
| Klotz         | 2019 | 1 | 1 | 1 | 1 | 1 | 1 | 1 | 1 | 1 | 9/9 |
| Kolerman      | 2017 | 1 | 1 | 1 | 1 | 1 | 1 | 1 | 0 | 1 | 8/9 |
| Komiyama      | 2008 | 1 | 1 | 0 | 1 | 1 | 1 | 1 | 0 | 1 | 7/9 |
| Krennmair (1) | 2016 | 1 | 1 | 0 | 1 | 1 | 1 | 1 | 1 | 1 | 8/9 |
| Krennmair (2) | 2019 | 1 | 1 | 1 | 1 | 1 | 1 | 1 | 1 | 1 | 9/9 |
| Kumar         | 2002 | 1 | 1 | 1 | 1 | 1 | 1 | 1 | 0 | 1 | 8/9 |
| Lambert       | 2000 | 1 | 1 | 0 | 1 | 1 | 1 | 1 | 1 | 1 | 8/9 |
| Le            | 2013 | 1 | 1 | 0 | 1 | 1 | 1 | 1 | 0 | 1 | 7/9 |
| Lee (1)       | 2018 | 1 | 1 | 0 | 1 | 1 | 1 | 1 | 1 | 0 | 7/9 |
| Lee (2)       | 2020 | 1 | 1 | 0 | 1 | 1 | 1 | 1 | 0 | 1 | 7/9 |
| Leventi       | 2014 | 1 | 1 | 0 | 1 | 1 | 1 | 1 | 0 | 1 | 7/9 |
| Levin (1)     | 2008 | 1 | 1 | 1 | 1 | 1 | 1 | 1 | 0 | 1 | 8/9 |
| Levin (2)     | 2011 | 1 | 1 | 1 | 1 | 1 | 1 | 1 | 1 | 1 | 9/9 |
| Lin           | 2012 | 1 | 1 | 0 | 1 | 1 | 1 | 1 | 0 | 1 | 7/9 |
| Lindquist     | 1997 | 1 | 1 | 0 | 1 | 1 | 1 | 1 | 1 | 1 | 8/9 |
| Lini          | 2019 | 1 | 1 | 1 | 1 | 1 | 1 | 1 | 1 | 0 | 8/9 |
| Lobato        | 2020 | 1 | 1 | 0 | 1 | 1 | 1 | 1 | 1 | 0 | 7/9 |
| Locante       | 2004 | 1 | 1 | 0 | 1 | 1 | 1 | 1 | 0 | 1 | 7/9 |
| Lombardo      | 2020 | 1 | 1 | 1 | 1 | 1 | 1 | 1 | 1 | 1 | 9/9 |
| Luongo        | 2020 | 1 | 1 | 0 | 1 | 1 | 1 | 1 | 0 | 1 | 7/9 |
| Malchiodi (1) | 2014 | 1 | 1 | 1 | 1 | 1 | 1 | 1 | 1 | 1 | 9/9 |
| Malchiodi (2) | 2016 | 1 | 1 | 0 | 1 | 1 | 1 | 1 | 1 | 1 | 8/9 |
| Maló (1)      | 2013 | 1 | 1 | 1 | 1 | 1 | 1 | 1 | 0 | 1 | 8/9 |
| Maló (2)      | 2019 | 1 | 1 | 1 | 1 | 1 | 1 | 1 | 1 | 1 | 9/9 |
| Maló (3)      | 2019 | 1 | 1 | 0 | 1 | 1 | 1 | 1 | 1 | 1 | 8/9 |
| Mastrangelo   | 2018 | 1 | 1 | 0 | 1 | 1 | 1 | 1 | 1 | 1 | 8/9 |
| Mayfield      | 2001 | 1 | 1 | 0 | 1 | 1 | 1 | 1 | 0 | 1 | 7/9 |

|                 |      |   |   |   |   |   |   |   |   |   |     |
|-----------------|------|---|---|---|---|---|---|---|---|---|-----|
| McCarthy        | 2003 | 1 | 1 | 1 | 1 | 1 | 1 | 1 | 0 | 1 | 8/9 |
| Mendonca        | 2014 | 1 | 1 | 0 | 1 | 1 | 1 | 1 | 1 | 1 | 8/9 |
| Merli (1)       | 2017 | 1 | 1 | 0 | 1 | 1 | 1 | 1 | 1 | 1 | 8/9 |
| Merli (2)       | 2020 | 1 | 1 | 1 | 1 | 1 | 1 | 1 | 1 | 1 | 9/9 |
| Mertens         | 2012 | 1 | 1 | 1 | 1 | 1 | 1 | 1 | 1 | 1 | 9/9 |
| Mijiritsky (1)  | 2013 | 1 | 1 | 1 | 1 | 1 | 1 | 1 | 0 | 1 | 8/9 |
| Mijiritsky (2)  | 2015 | 1 | 1 | 1 | 1 | 1 | 1 | 1 | 0 | 1 | 8/9 |
| Mijiritsky (3)  | 2016 | 1 | 1 | 0 | 1 | 1 | 1 | 1 | 0 | 1 | 7/9 |
| Minsk           | 1996 | 1 | 1 | 1 | 1 | 1 | 1 | 1 | 0 | 1 | 8/9 |
| Mir-Mari        | 2012 | 1 | 1 | 0 | 1 | 1 | 1 | 1 | 0 | 1 | 7/9 |
| Moheng          | 2005 | 1 | 1 | 1 | 1 | 1 | 1 | 1 | 1 | 1 | 9/9 |
| Moraguez        | 2016 | 1 | 1 | 0 | 1 | 1 | 1 | 1 | 1 | 1 | 8/9 |
| Morales-Vadillo |      | 1 | 1 | 1 | 1 | 1 | 1 | 1 | 0 | 1 | 8/9 |
| Mordenfeld      | 2014 | 1 | 1 | 1 | 1 | 1 | 1 | 1 | 1 | 1 | 9/9 |
| Mundt           | 2006 | 1 | 1 | 1 | 1 | 1 | 1 | 1 | 1 | 1 | 9/9 |
| Munoz           | 2021 | 1 | 1 | 0 | 1 | 1 | 1 | 1 | 1 | 1 | 8/9 |
| Naeini          | 2018 | 1 | 1 | 0 | 1 | 1 | 1 | 1 | 1 | 1 | 8/9 |
| Nedir           | 2004 | 1 | 1 | 1 | 1 | 1 | 1 | 1 | 0 | 1 | 8/9 |
| Niedemaier      | 2017 | 1 | 1 | 0 | 1 | 1 | 1 | 1 | 1 | 1 | 8/9 |
| Nitzan          | 2005 | 1 | 1 | 1 | 1 | 1 | 1 | 1 | 0 | 1 | 8/9 |
| Noelken         | 2020 | 1 | 1 | 0 | 1 | 1 | 1 | 1 | 1 | 1 | 8/9 |
| Nogueira        | 2018 | 1 | 1 | 1 | 1 | 1 | 1 | 1 | 1 | 1 | 9/9 |
| Noguerol        | 2006 | 1 | 1 | 1 | 1 | 1 | 1 | 1 | 1 | 1 | 9/9 |
| Norton          | 2017 | 1 | 1 | 1 | 1 | 1 | 1 | 1 | 1 | 1 | 9/9 |
| Nyström         | 2009 | 1 | 1 | 1 | 1 | 1 | 1 | 1 | 1 | 1 | 9/9 |
| Oliva           | 2012 | 1 | 1 | 0 | 1 | 1 | 1 | 1 | 0 | 1 | 7/9 |
| Olmedo-Gaya     | 2016 | 1 | 1 | 1 | 1 | 1 | 1 | 1 | 1 | 1 | 9/9 |
| Olson           | 2000 | 1 | 1 | 0 | 1 | 1 | 1 | 1 | 1 | 1 | 8/9 |
| Omran           | 2015 | 1 | 1 | 1 | 1 | 1 | 1 | 1 | 1 | 1 | 9/9 |
| Park            | 2019 | 1 | 1 | 0 | 1 | 1 | 1 | 1 | 1 | 1 | 8/9 |
| Patil           | 2020 | 1 | 1 | 0 | 1 | 1 | 1 | 1 | 0 | 1 | 7/9 |
| Peleg           | 2006 | 1 | 1 | 0 | 1 | 1 | 1 | 1 | 0 | 1 | 7/9 |
| Penarrocha      | 2014 | 1 | 1 | 0 | 1 | 1 | 1 | 1 | 0 | 1 | 7/9 |

|                       |      |   |   |   |   |   |   |   |   |   |     |
|-----------------------|------|---|---|---|---|---|---|---|---|---|-----|
| Penarrocha-<br>Oltra  | 2019 | 1 | 1 | 1 | 1 | 1 | 1 | 1 | 1 | 1 | 9/9 |
| Perez                 | 2020 | 1 | 1 | 0 | 1 | 1 | 1 | 1 | 1 | 1 | 8/9 |
| Pico                  | 2019 | 1 | 1 | 1 | 1 | 1 | 1 | 1 | 1 | 1 | 9/9 |
| Pozzi (1)             | 2014 | 1 | 1 | 1 | 1 | 1 | 1 | 1 | 1 | 1 | 9/9 |
| Pozzi (2)             | 2014 | 1 | 1 | 1 | 1 | 1 | 1 | 1 | 1 | 1 | 9/9 |
| Pozzi (3)             | 2015 | 1 | 1 | 1 | 1 | 1 | 1 | 1 | 1 | 1 | 9/9 |
| Pozzi (4)             | 2016 | 1 | 1 | 1 | 1 | 1 | 1 | 1 | 1 | 1 | 9/9 |
| Prati                 | 2020 | 1 | 1 | 1 | 1 | 1 | 1 | 1 | 1 | 1 | 9/9 |
| Queridinha            | 2016 | 1 | 1 | 0 | 1 | 1 | 1 | 1 | 1 | 1 | 8/9 |
| Raabe                 | 2021 | 1 | 1 | 0 | 1 | 1 | 1 | 1 | 1 | 1 | 8/9 |
| Raes (1)              | 2015 | 1 | 1 | 1 | 1 | 1 | 1 | 1 | 1 | 1 | 9/9 |
| Raes (2)              | 2018 | 1 | 1 | 0 | 1 | 1 | 1 | 1 | 1 | 1 | 8/9 |
| Ramaglia              | 2015 | 1 | 1 | 0 | 1 | 1 | 1 | 1 | 0 | 1 | 7/9 |
| Rasperini             | 2014 | 1 | 1 | 1 | 1 | 1 | 1 | 1 | 0 | 1 | 8/9 |
| Ravida (1)            | 2018 | 1 | 1 | 0 | 1 | 1 | 1 | 1 | 1 | 1 | 8/9 |
| Ravida (2)            | 2019 | 1 | 1 | 1 | 1 | 1 | 1 | 1 | 1 | 1 | 9/9 |
| Roccuzzo              | 2016 | 1 | 1 | 1 | 1 | 1 | 1 | 1 | 1 | 1 | 9/9 |
| Rodriguez-<br>Argueta | 2011 | 1 | 1 | 1 | 1 | 1 | 1 | 1 | 0 | 1 | 8/9 |
| Romandini             | 2019 | 1 | 1 | 0 | 1 | 1 | 1 | 1 | 0 | 1 | 7/9 |
| Romanos (1)           | 2013 | 1 | 1 | 0 | 1 | 1 | 1 | 1 | 0 | 1 | 7/9 |
| Romanos (2)           | 2014 | 1 | 1 | 0 | 1 | 1 | 1 | 1 | 0 | 1 | 7/9 |
| Rosen (1)             | 1999 | 1 | 1 | 1 | 1 | 1 | 1 | 1 | 0 | 1 | 8/9 |
| Rosen (2)             | 2018 | 1 | 1 | 1 | 1 | 1 | 1 | 1 | 1 | 1 | 9/9 |
| Rossi (1)             | 2017 | 1 | 1 | 1 | 1 | 1 | 1 | 1 | 0 | 1 | 8/9 |
| Rossi (2)             | 2018 | 1 | 1 | 1 | 1 | 1 | 1 | 1 | 0 | 1 | 8/9 |
| Salman                | 2019 | 1 | 1 | 0 | 1 | 1 | 1 | 1 | 1 | 1 | 8/9 |
| Sánchez-Pérez         | 2007 | 1 | 1 | 1 | 1 | 1 | 1 | 1 | 0 | 1 | 8/9 |
| Sanna                 | 2007 | 1 | 1 | 1 | 1 | 1 | 1 | 1 | 1 | 1 | 9/9 |
| Sanz-Martin           | 2017 | 1 | 1 | 1 | 1 | 1 | 1 | 1 | 1 | 1 | 9/9 |
| Sayardoust            | 2013 | 1 | 1 | 1 | 1 | 1 | 1 | 1 | 0 | 1 | 8/9 |
| Schlee                | 2015 | 1 | 1 | 0 | 1 | 1 | 1 | 1 | 0 | 1 | 7/9 |
| Schmid (1)            | 2020 | 1 | 1 | 0 | 1 | 1 | 1 | 1 | 1 | 1 | 8/9 |
| Schmid (2)            | 2021 | 1 | 1 | 0 | 1 | 1 | 1 | 1 | 1 | 1 | 8/9 |



|               |      |   |   |   |   |   |   |   |   |   |     |
|---------------|------|---|---|---|---|---|---|---|---|---|-----|
| Schneider     | 2012 | 1 | 1 | 1 | 1 | 1 | 1 | 1 | 1 | 1 | 9/9 |
| Schoenbaum    | 2021 | 1 | 1 | 0 | 1 | 1 | 1 | 1 | 1 | 1 | 8/9 |
| Schwartz-Arad |      | 1 | 1 | 0 | 1 | 1 | 1 | 1 | 0 | 1 | 7/9 |
| (1)           | 2000 |   |   |   |   |   |   |   |   |   |     |
| Schwartz-Arad |      | 1 | 1 | 0 | 1 | 1 | 1 | 1 | 0 | 1 | 7/9 |
| (2)           | 2002 |   |   |   |   |   |   |   |   |   |     |
| Schwartz-Arad |      | 1 | 1 | 1 | 1 | 1 | 1 | 1 | 1 | 1 | 9/9 |
| (3)           | 2016 |   |   |   |   |   |   |   |   |   |     |
| Shibuya       | 2012 | 1 | 1 | 0 | 1 | 1 | 1 | 1 | 0 | 1 | 7/9 |
| Si (1)        | 2016 | 1 | 1 | 1 | 1 | 1 | 1 | 1 | 1 | 1 | 9/9 |
| Si (2)        | 2019 | 1 | 1 | 1 | 1 | 1 | 1 | 1 | 1 | 1 | 9/9 |
| Siebers       | 2010 | 1 | 1 | 0 | 1 | 1 | 1 | 1 | 0 | 1 | 7/9 |
| Simons        | 2015 | 1 | 1 | 0 | 1 | 1 | 1 | 1 | 1 | 1 | 8/9 |
| Sivolella     | 2020 | 1 | 1 | 0 | 1 | 1 | 1 | 1 | 1 | 1 | 8/9 |
| Souza         | 2019 | 1 | 1 | 0 | 1 | 1 | 1 | 1 | 0 | 1 | 7/9 |
| Stacchi       | 2021 | 1 | 1 | 1 | 1 | 1 | 1 | 1 | 1 | 1 | 9/9 |
| Stoker        | 2012 | 1 | 1 | 0 | 1 | 1 | 1 | 1 | 0 | 1 | 7/9 |
| Strietzel     | 2011 | 1 | 1 | 0 | 1 | 1 | 1 | 1 | 1 | 1 | 8/9 |
| Sverzut       | 2008 | 1 | 1 | 1 | 1 | 1 | 1 | 1 | 1 | 1 | 9/9 |
| Tallarico (1) | 2016 | 1 | 1 | 1 | 1 | 1 | 1 | 1 | 1 | 1 | 9/9 |
| Tallarico (2) | 2017 | 1 | 1 | 1 | 1 | 1 | 1 | 1 | 1 | 1 | 9/9 |
| Tallarico (3) | 2018 | 1 | 1 | 1 | 1 | 1 | 1 | 1 | 1 | 0 | 8/9 |
| Tartaglia     | 2016 | 1 | 1 | 0 | 1 | 1 | 1 | 1 | 1 | 1 | 8/9 |
| Taschieri     | 2018 | 1 | 1 | 0 | 1 | 1 | 1 | 1 | 1 | 1 | 8/9 |
| Tattan        | 2021 | 1 | 1 | 1 | 1 | 1 | 1 | 1 | 1 | 1 | 9/9 |
| Tawil         | 2008 | 1 | 1 | 1 | 1 | 1 | 1 | 1 | 1 | 1 | 9/9 |
| Tealdo        | 2015 | 1 | 1 | 0 | 1 | 1 | 1 | 1 | 0 | 1 | 7/9 |
| Temmerman     | 2015 | 1 | 1 | 0 | 1 | 1 | 1 | 1 | 1 | 1 | 8/9 |
| Testori (1)   | 2001 | 1 | 1 | 1 | 1 | 1 | 1 | 1 | 0 | 1 | 8/9 |
| Testori (2)   | 2014 | 1 | 1 | 1 | 1 | 1 | 1 | 1 | 1 | 1 | 9/9 |
| Testori (3)   | 2017 | 1 | 1 | 0 | 1 | 1 | 1 | 1 | 0 | 1 | 7/9 |
| Testori (4)   | 2017 | 1 | 1 | 0 | 1 | 1 | 1 | 1 | 1 | 1 | 8/9 |
| Thoma (1)     | 2018 | 1 | 1 | 0 | 1 | 1 | 1 | 1 | 1 | 1 | 8/9 |
| Thoma (2)     | 2019 | 1 | 1 | 0 | 1 | 1 | 1 | 1 | 0 | 1 | 7/9 |
| Thoma (3)     | 2020 | 1 | 1 | 0 | 1 | 1 | 1 | 1 | 1 | 1 | 8/9 |



<sup>a</sup> 3 months of follow-up was considered to be of adequate length.

Color codes concerning risk of bias of the studies (last column of the table): low (green), moderate (yellow) or high (red) risk of bias
